# Supplementary material for: Quality measures of virtual care in ambulatory healthcare environments: a scoping review
Source: PubMed Central journal article supplement — BMJ Open. 2024 Apr 2;14(4):e078214. doi: 10.1136/bmjopen-2023-078214 (PMC10989112; doi:10.1136/bmjopen-2023-078214), 2024-04-02
Supplement: bmjopen-2023-078214.draft_revisions.pdf [file bmjopen-2023-078214.draft_revisions.pdf]

# BMJ Open

BMJ Open is committed to open peer review. As part of this commitment we make the peer review history of every article we publish publicly available.

When an article is published we post the peer reviewers' comments and the authors' responses online. We also post the versions of the paper that were used during peer review. These are the versions that the peer review comments apply to.

The versions of the paper that follow are the versions that were submitted during the peer review process. They are not the versions of record or the final published versions. They should not be cited or distributed as the published version of this manuscript.

BMJ Open is an open access journal and the full, final, typeset and author-corrected version of record of the manuscript is available on our site with no access controls, subscription charges or pay-per-view fees (<http://bmjopen.bmj.com>).

If you have any questions on BMJ Open's open peer review process please email [info.bmjopen@bmj.com](mailto:info.bmjopen@bmj.com)

# BMJ Open

## Quality measures of virtual care in ambulatory healthcare environments: A scoping review

|                               |                                                                                                                                                                                                                                                                                                                                                                                                                                                                                                                                                                                                                                                                                                                                                                                                                                                                                                                                                                                                                                                                                                                                                                                                                                                          |
|-------------------------------|----------------------------------------------------------------------------------------------------------------------------------------------------------------------------------------------------------------------------------------------------------------------------------------------------------------------------------------------------------------------------------------------------------------------------------------------------------------------------------------------------------------------------------------------------------------------------------------------------------------------------------------------------------------------------------------------------------------------------------------------------------------------------------------------------------------------------------------------------------------------------------------------------------------------------------------------------------------------------------------------------------------------------------------------------------------------------------------------------------------------------------------------------------------------------------------------------------------------------------------------------------|
| Journal:                      | <i>BMJ Open</i>                                                                                                                                                                                                                                                                                                                                                                                                                                                                                                                                                                                                                                                                                                                                                                                                                                                                                                                                                                                                                                                                                                                                                                                                                                          |
| Manuscript ID                 | bmjopen-2023-078214                                                                                                                                                                                                                                                                                                                                                                                                                                                                                                                                                                                                                                                                                                                                                                                                                                                                                                                                                                                                                                                                                                                                                                                                                                      |
| Article Type:                 | Original research                                                                                                                                                                                                                                                                                                                                                                                                                                                                                                                                                                                                                                                                                                                                                                                                                                                                                                                                                                                                                                                                                                                                                                                                                                        |
| Date Submitted by the Author: | 27-Jul-2023                                                                                                                                                                                                                                                                                                                                                                                                                                                                                                                                                                                                                                                                                                                                                                                                                                                                                                                                                                                                                                                                                                                                                                                                                                              |
| Complete List of Authors:     | <p>Petrie, Samuel; University Health Network, Ted Rogers Centre for Heart Research; University of Toronto, Institute of Health Policy, Management and Evaluation</p> <p>Laur, Celia ; Women's College Hospital, Women's College Institute for Health Systems Solutions and Virtual Care; University of Toronto, Institute of Health Policy, Management and Evaluation</p> <p>Rios, Patricia; Women's College Hospital, Women's College Institute for Health Systems Solutions and Virtual Care</p> <p>Suarez, Ally; Women's College Hospital, Women's College Institute for Health Systems Solutions and Virtual Care</p> <p>Makanjuola, Oluwatoni; Women's College Hospital, Women's College Institute for Health Systems Solutions and Virtual Care</p> <p>Burke, Emeraldalda; Women's College Hospital, Women's College Institute for Health Systems Solutions and Virtual Care</p> <p>Bhattacharyya, Onil; University of Toronto, Family and Community Medicine; Women's College Hospital, Women's College Institute for Health Systems Solutions and Virtual Care</p> <p>Mukerji, Geetha; Women's College Hospital, Women's College Institute for Health Systems Solutions and Virtual Care; University of Toronto, Temerty Faculty of Medicine</p> |
| Keywords:                     | Quality in health care < HEALTH SERVICES ADMINISTRATION & MANAGEMENT, Telemedicine < BIOTECHNOLOGY & BIOINFORMATICS, Patient-Centered Care, Health Equity                                                                                                                                                                                                                                                                                                                                                                                                                                                                                                                                                                                                                                                                                                                                                                                                                                                                                                                                                                                                                                                                                                |
|                               |                                                                                                                                                                                                                                                                                                                                                                                                                                                                                                                                                                                                                                                                                                                                                                                                                                                                                                                                                                                                                                                                                                                                                                                                                                                          |

SCHOLARONE™  
Manuscripts

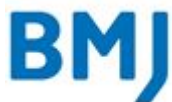

I, the Submitting Author has the right to grant and does grant on behalf of all authors of the Work (as defined in the below author licence), an exclusive licence and/or a non-exclusive licence for contributions from authors who are: i) UK Crown employees; ii) where BMJ has agreed a CC-BY licence shall apply, and/or iii) in accordance with the terms applicable for US Federal Government officers or employees acting as part of their official duties; on a worldwide, perpetual, irrevocable, royalty-free basis to BMJ Publishing Group Ltd ("BMJ") its licensees and where the relevant Journal is co-owned by BMJ to the co-owners of the Journal, to publish the Work in this journal and any other BMJ products and to exploit all rights, as set out in our [licence](#).

The Submitting Author accepts and understands that any supply made under these terms is made by BMJ to the Submitting Author unless you are acting as an employee on behalf of your employer or a postgraduate student of an affiliated institution which is paying any applicable article publishing charge ("APC") for Open Access articles. Where the Submitting Author wishes to make the Work available on an Open Access basis (and intends to pay the relevant APC), the terms of reuse of such Open Access shall be governed by a Creative Commons licence – details of these licences and which [Creative Commons](#) licence will apply to this Work are set out in our licence referred to above.

Other than as permitted in any relevant BMJ Author's Self Archiving Policies, I confirm this Work has not been accepted for publication elsewhere, is not being considered for publication elsewhere and does not duplicate material already published. I confirm all authors consent to publication of this Work and authorise the granting of this licence.

1  
2  
3 1 Quality measures of virtual care in ambulatory healthcare environments: A scoping  
4 review  
5 2  
6 3

8 4 Samuel Petrie (ORCID: 0000-0001-6809-6027)<sup>1,3†</sup>, Celia V Laur (ORCID: 0000-0003-  
9 4555-1407)<sup>2,3†</sup>, Patricia Rios (ORCID: 0000-0003-2599-282X)<sup>2</sup>, Ally Suarez<sup>2</sup>, Oluwatoni  
10 5 Makanjuola<sup>2</sup>, Emeralda Burke<sup>2</sup>, Onil Bhattacharyya (ORCID: 0000-0001-5219-7288)<sup>2,3,4</sup>,  
11 6 Geetha Mukerji (ORCID:0000-0002-6477-9848)<sup>2,3,5\*</sup>  
12 7  
13 8

15 9  
16 10  
17 11  
18 12  
19 13  
20 14  
21 15  
22 16  
23 17  
24 18  
25 19  
26 20  
27 21  
28 22  
29 23  
30 24  
31 25  
32 26  
33 27  
34 28  
35 29  
36 30  
37 31  
38 32  
39 33  
40 34  
41 35  
42 36  
43 37  
44 38  
45 39  
46 40  
47 41  
48 42  
49 43  
50 44  
51 45  
52 46  
53 47  
54 48  
55 49  
56 50  
57 51  
58 52  
59 53  
60 54

1 Ted Rogers Centre for Heart Research, University Health Network, Toronto, ON,  
Canada

2 Women's College Institute for Health Systems Solutions and Virtual Care, Women's  
College Hospital, Toronto, ON, Canada

3 Institute of Health Policy, Management and Evaluation, University of Toronto, Toronto,  
ON, Canada

4 Department of Family & Community Medicine, Temerty Faculty of Medicine, University  
of Toronto, Toronto, ON, Canada

5 Department of Medicine, Temerty Faculty of Medicine, University of Toronto, Toronto,  
ON, Canada

\*Corresponding Author: Geetha Mukerji, Women's College Hospital Institute for Health  
System Solutions & Virtual Care, Rm 3414, 76 Grenville Street, Toronto, Ontario M5S  
1B3; e-mail: [geetha.mukerji@wchospital.ca](mailto:geetha.mukerji@wchospital.ca)

†These authors contributed equally to this work

**Keywords:** Quality Improvement; Quality Indicators, Health Care; Delivery of Health  
Care; Virtual Medicine

**ABSTRACT**

**Objectives:** Delivery of virtual care - i.e., any interaction between patients and/or members of their circle of care occurring remotely using any form of communication or information technologies - increased throughout the COVID-19 pandemic and persisted after physical distancing measures were dropped. However, little is known about how best to measure the quality of virtual care, as extant measures focus on in-person care and may be not applicable for a virtual context. This scoping review aims to understand the connections between virtual care modalities and quality measures within the Quintuple Aim: provider experience, patient experience, per capita cost, population health, and health equity.

**Design:** Five databases and multiple grey literature sources were searched for publications that analysed virtual care in ambulatory settings. Indicators were extracted, double coded into the Quintuple Aim framework, and categorized based on the National Academy of Medicine quality framework (safety, effectiveness, patient-centeredness, timeliness, efficiency, and equity). Sustainability was added to capture potential for continued use of virtual care.

**Results:** A total of 13,504 citations were double screened resulting in 631 full-text articles, of which 66 articles were included. Articles were mostly observational designs (n=30) and published in North America (n=29) or Europe (n=21). Common virtual care modalities included video or audio visits (n=43), remote monitoring (n=11), and mobile applications (n=11). The most reported type of quality indicator related to patient experience (n=58 articles), followed by provider experience (n=25), population health outcomes (n=23), and health system costs (n=19).

1  
2  
3 55 **Conclusions:** The connection between virtual care modalities and quality domains  
4  
5 56 identified through this review can inform clinicians, healthcare managers, and other  
6  
7 57 decision makers, on how to monitor quality of virtual care, and inform quality  
8  
9 58 improvement efforts. Next steps include the development of a prioritized subset of  
10  
11 59 indicators within a balanced scorecard of virtual care quality indicators for ambulatory  
12  
13 60 settings.  
14  
15

### 16 17 61 **Strengths and limitations of this study**

- 18  
19 62 • Literature search developed by an academic librarian and included sources from a  
20  
21 63 wide variety of medical and health policy databases, grey literature, and targeted  
22  
23 64 web and journal searches
- 24  
25 65 • Used established scoping review methods for literature search, study selection, data  
26  
27 66 collection, coding, and reporting
- 28  
29 67 • Applied established quality frameworks like the Quintuple Aim and the National  
30  
31 68 Academy of Medicine quality domains to map existing quality indicators in virtual  
32  
33 69 care
- 34  
35 70 • Literature search was limited to articles published after 2015 and available in English  
36  
37 71 language only
- 38  
39 72 • Categorization of indicators was complicated by the lack of reported detail that  
40  
41 73 required assumptions to be made in certain cases  
42  
43  
44  
45  
46  
47  
48  
49  
50  
51  
52  
53  
54  
55  
56  
57  
58  
59  
60

## 75 INTRODUCTION

76 Virtual care, defined as any interaction between patients and/or caregivers and their  
77 healthcare providers (or “circle of care”) that occurs remotely and is facilitated through  
78 digital communication or other information technologies (1), was largely underutilized for  
79 delivering healthcare services in Canada prior to the COVID-19 pandemic (2). The  
80 COVID-19 pandemic changed the global healthcare landscape and accelerated the  
81 implementation of and access to virtual care for patients (2). The demands for virtual  
82 care continue post-pandemic, with many patients appreciating the convenience and  
83 want the option to receive care virtually(3,4). Healthcare providers also see the value of  
84 virtual care in situations due to its’ potential to improve patient access to care, (i.e., for  
85 those with mobility issues or living in rural/remote areas), convenience, and for  
86 maintaining connections with patients in between in-person visits (5). The future of  
87 healthcare delivery will require the integration of both virtual and in-person modalities  
88 across the continuum of care (6), but we need to be able to better measure quality of  
89 virtual care. Virtual care was introduced to reduce the risk of infectious disease  
90 transmission during the COVID-19 pandemic, but its continued use should depend on  
91 its impact on the quality of care and the experiences of patients, caregivers, and  
92 healthcare providers.

93 Quality indicators are standardized, evidence-based measures that can be used to track  
94 and compare health outcomes and performance over time and across different  
95 organizations (7,8). Measurement of these indicators can identify gaps in care delivery  
96 and inform quality improvement (QI) efforts within an organization, across health  
97 systems, and across geographical boundaries. However, traditional indicators to assess

1  
2  
3 98 quality in healthcare primarily focus on in-person care and may have limited applicability  
4  
5 99 to care delivered virtually. While some literature on virtual care indicators have been  
6  
7  
8 100 published, most studies focus solely within a specific clinical area (e.g., obstetrics,  
9  
10 101 cardiology, etc.) or few domains of interest (e.g., acceptability, satisfaction etc.), limiting  
11  
12 102 the scope and applicability for healthcare organizations to evaluate what constitutes  
13  
14 103 “quality” in virtual care (9–11). Since virtual care can now be considered an integral  
15  
16 104 option for health care delivery, it is important to understand the breadth of domains of  
17  
18 105 quality related to virtual care in order to characterize and identifying individual quality  
19  
20 106 indicators(12).

21  
22  
23  
24 107 As virtual care becomes an integrated part of a patient’s care journey via hybrid  
25  
26 108 healthcare models, this review can help clinicians and decision makers understand how  
27  
28 109 to measure quality of a virtual care in an appropriate and comprehensive fashion across  
29  
30 110 all relevant domains of quality. The aim of this scoping review is to determine the  
31  
32 111 connections between virtual care modalities and quality domains within the Quintuple  
33  
34 112 Aim framework in ambulatory/outpatient settings. This review contributes to this aim in  
35  
36 113 three distinct ways. First, it is the first review to the author’s knowledge which  
37  
38 114 systemically categorizes quality indicators of virtual care according to two separate  
39  
40 115 existing quality frameworks: the Quintuple aim and the National Academy of Medicine’s  
41  
42 116 (NAM) quality framework. Second, this review was agnostic with regards to virtual care  
43  
44 117 modalities. Understanding that care is care, as outlined by the government of Canada in  
45  
46 118 a 2021 report, implies that all modalities of virtual care should be understood from a  
47  
48 119 quality perspective, not just video-conferencing, for example(12). Lastly, the  
49  
50 120 methodology used for this review was broad in scope, seeking to collate a  
51  
52  
53  
54  
55  
56  
57  
58  
59  
60



1  
2  
3 121 comprehensive list of quality indicators reported in the literature. This work will provide  
4  
5 122 the foundation for identification and categorization of quality indicators that can inform  
6  
7 123 clinicians, healthcare managers, and other decision makers how best to monitor quality  
8  
9  
10 124 of virtual care, identify performance gaps, and target areas for future improvement  
11  
12 125 efforts.

## 14 126 **METHODS**

16  
17 127 Our scoping review methodology was guided by the Joanna Briggs Institute (JBI)  
18  
19 128 Manual for Evidence Synthesis (13) and by the World Health Organization's (WHO)  
20  
21 129 guide on rapid reviews (14). Reporting of methods and results was developed in  
22  
23 130 accordance with the PRISMA extension statement for scoping reviews (Supplemental  
24  
25 131 Material 1) (15).

### 28 132 **Information sources and literature search**

30  
31 133 A comprehensive literature search was developed in consultation with an academic  
32  
33 134 librarian that included published academic and grey literature sources, as well as hand  
34  
35 135 searches of relevant journals. Initial literature searches were conducted in June 2021  
36  
37 136 and were updated in August 2022. Databases searched included MEDLINE, EMBASE,  
38  
39 137 PsycINFO, The Cochrane Library, and the JBI Evidence-based practice database  
40  
41 138 (Supplemental Material 2 – Table 1). Keyword searches were also carried out in  
42  
43 139 selected websites, Google Scholar, Medrxiv, and Open Grey to identify grey literature  
44  
45 140 including policy documents, organizational strategies, and unpublished academic  
46  
47 141 literature (Supplemental Material 2 – Table 2). Specialty journals focused on  
48  
49 142 virtual/digital care – Journal of Medical Internet Research, Lancet Digital Health, and  
50  
51 143 Nature Digital Medicine – were hand searched from 2015 onwards.  
52  
53  
54  
55  
56  
57  
58  
59  
60

## 144 **Eligibility criteria**

145 The eligibility criteria were structured based on the “Population, Context, Concept”  
146 (PCC) research framework(13) as follows:

- 147 • *Population*: adults receiving ambulatory/outpatient care through healthcare  
148 organizations for chronic or acute/subacute conditions.
- 149 • *Context*: participation in virtual care, defined as “any interaction between patients  
150 and/or members of their circle of care, occurring remotely, using any forms of  
151 communication or information technologies”(1)
- 152 • *Concept*: within the Quintuple Aim framework (provider experience, patient  
153 experience, per capita cost, population health, and health equity)(16), indicators are  
154 based in the NAM’s quality framework (safety, effectiveness, patient-centeredness,  
155 timeliness, efficiency and equity) and sustainability(17).

156 Studies that focused on only one domain in a specific population were excluded.

157 Disease specific publications were only included if they focused on two or more quality  
158 domains. Due to changes in technology and the rapid increase in virtual care, we only  
159 include studies published only in English from 2015-2022 to accommodate the rapid  
160 timeline for the review and acknowledge the changes in virtual care over the past few  
161 years.

## 162 **Study selection process**

163 The literature search results were uploaded into Covidence review manager and de-  
164 duplicated prior to screening. Screening questions based on the eligibility criteria  
165 (Supplemental Material 2 – Figure 1) were developed for both title/abstract and full-text  
166 screening and pilot tested with rounds of randomly selected citations until satisfactory

1  
2  
3 167 agreement (>75%) was reached between reviewers. Double screening of title/abstracts  
4  
5 168 was conducted (by CL, PR, VK, and AS), followed by full text screening by a single  
6  
7 169 reviewer for a streamlined approach. After full text screening, all excluded citations or  
8  
9  
10 170 articles were re-reviewed by an independent second reviewer (PR) to ensure accuracy.  
11  
12 171 A similar process was followed for the 2022 update with SP, PR and AS, as reviewers.  
13

## 14 172 **Data collection and management**

15  
16  
17 173 Initially, to enable rapid review, data extraction was to be completed by a single  
18  
19 174 reviewer. However, with large heterogeneity across the types of papers, and the lack of  
20  
21 175 standardization in reporting of quality indicators and domains, the team opted for a more  
22  
23 176 rigorous approach with two reviewers (two of CL, PR, VK, SP, and AS) independently  
24  
25 177 extracting each article. Any discrepancies in extracted data were reviewed and resolved  
26  
27 178 by an independent third reviewer. A standardized data extraction form was developed to  
28  
29 179 summarize and record the reviewed studies within Covidence review manager. Data  
30  
31 180 items included publication characteristics (year of publication, country, study design,  
32  
33 181 funding source, and sample size), intervention details (care setting, virtual care  
34  
35 182 modality, primary condition/health concern), and details on reported quality indicators  
36  
37 183 (definition, measurement/scoring tools, etc.).  
38  
39  
40  
41

## 42 184 **Data Synthesis**

43  
44 185 Individual indicators were used to demonstrate the connections between virtual care  
45  
46 186 modalities and the Quintuple Aim (16); patient experience and provider experience were  
47  
48 187 further sub-coded into the NAM quality domains (17) along with sustainability, which  
49  
50 188 was visualized through an alluvial (also known as Sankey) diagram. Although these  
51  
52 189 individual indicators will be further refined through a future Delphi consensus process to  
53  
54  
55  
56  
57  
58  
59  
60

1  
2  
3 190 narrow a subset of indicators across quality domains, the proportions provide valuable  
4  
5 191 information regarding the types of quality domains and their corresponding modalities.  
6  
7

## 8 192 **Risk of bias**

9  
10 193 As this was a scoping review intended to capture a collection of quality indicator items,  
11  
12 194 rather than evaluate their effectiveness or appropriateness, risk of bias was not  
13  
14 195 assessed based on current published guidelines (13).  
15  
16

## 17 196 **Patient and Public Involvement Statement**

18  
19 197 Patients were involved in the conception and development of the scoping review as well  
20  
21 198 as the presentation and dissemination of results through the Patient Experience  
22  
23 199 Advisors program and the Community Liaison Advisory Council (CLAC) at Women's  
24  
25 200 College Hospital. We intend to solicit further patient participation as well as general  
26  
27 201 public involvement in future work developing a balanced scorecard based on the  
28  
29 202 literature identified in this review.  
30  
31  
32

## 33 203 **RESULTS**

34  
35 204 The literature search resulted in a total of 18,395 citations that were imported into  
36  
37 205 Covidence. A total of 4,891 duplicate citations were removed leaving 13,504 citations  
38  
39 206 for title and abstract screening. After title and abstract screening a total of 814 full-text  
40  
41 207 articles were identified for retrieval but 183 reports, mostly conference abstracts and  
42  
43 208 commentaries, were not retrieved for full-text screening. After assessing the reports for  
44  
45 209 eligibility, 66 articles were included for data extraction (Fig 1).  
46  
47  
48  
49

50 210

## 51 211 **Figure 1: PRISMA study flow diagram**

52 212  
53  
54  
55  
56  
57  
58  
59  
60

## 213 **Characteristics of Included Studies**

214 The included studies comprised 47 primary research studies (e.g., observational  
 215 studies) and 21 secondary research articles (e.g., systematic reviews). Table 1  
 216 summarizes the main characteristics of the included articles. The most frequent study  
 217 design were observational studies (n=32), followed by systematic reviews (n=11),  
 218 qualitative studies (n=5), and interventional trials (n=5). The majority of included studies  
 219 were published between 2018 and 2020 (n=25) in North America (n=29) or Europe  
 220 (n=22). Funding sources were mainly from public institutions (n=30), but a large  
 221 proportion of studies also reported no external funding for their study (n=24).

222 **Table 1: Characteristics of included studies (n=66)**

|                                             | <b>Primary Studies<br/>(n=45)<br/>[n (%)]</b> | <b>Secondary<br/>Studies (n=21)<br/>[n (%)]</b> |
|---------------------------------------------|-----------------------------------------------|-------------------------------------------------|
| <b>Year of Publication</b>                  |                                               |                                                 |
| 2015-2017                                   | 13 (29)                                       | 7 (33)                                          |
| 2018-2020                                   | 18 (40)                                       | 7 (33)                                          |
| 2021-2022                                   | 14 (31)                                       | 7 (33)                                          |
| <b>Country of Publication</b>               |                                               |                                                 |
| Asia                                        | 1 (2)                                         | 3 (14)                                          |
| Australia/South Pacific                     | 4 (9)                                         | 2 (10)                                          |
| Europe                                      | 14 (31)                                       | 7 (33)                                          |
| North Africa and Middle East                | 4 (9)                                         | 1 (5)                                           |
| North America                               | 21 (47)                                       | 8 (38)                                          |
| South America                               | 1 (2)                                         | --                                              |
| <b>Study Design</b>                         |                                               |                                                 |
| Case report/series                          | 1 (2)                                         | --                                              |
| Observational (cross-sectional, cohort)     | 30 (67)                                       | --                                              |
| Qualitative study                           | 5 (11)                                        | --                                              |
| Mixed methods                               | 3 (7)                                         | --                                              |
| Interventional (pre/post, controlled trial) | 5 (11)                                        | --                                              |

|                                                 |                            |             |
|-------------------------------------------------|----------------------------|-------------|
| Cost/Cost-Effectiveness                         | 1 (2)                      | --          |
| Systematic Review                               | --                         | 11 (53)     |
| Scoping/Umbrella Review                         | --                         | 4 (19)      |
| Integrative Review                              | --                         | 3 (14)      |
| Environmental Scan                              | --                         | 3 (14)      |
| <b>Funding Source</b>                           |                            |             |
| Private                                         | 1 (2)                      | 2 (10)      |
| Public                                          | 22 (49)                    | 8 (38)      |
| Mixed                                           | 2 (5)                      | --          |
| None                                            | 14 (31)                    | 9 (42)      |
| Not Reported                                    | 6 (13)                     | 2 (10)      |
| <b>Number of participants</b>                   |                            |             |
| Patients/Caregivers [median (IQR)]              | 115 (42-265)               | --          |
| Healthcare Providers [median (IQR)]             | 18 (13, 22)                | --          |
| <b>Participant Age</b>                          |                            |             |
| Patients/Caregivers [median (IQR)]              | 55.5 (47, 63)              | --          |
| Healthcare Providers [range]                    | 22-76                      | --          |
| <b>Participant Gender (%)</b>                   |                            |             |
| Patients/Caregivers [median]                    | Female: 53.7<br>Male: 50   | --          |
| Healthcare Providers [median]                   | Female: 61.3<br>Male: 38.7 | --          |
| <b>Review Methods</b>                           |                            |             |
| Number of included publications [median (IQR)]  | --                         | 17 (12, 22) |
| Reported inclusion/exclusion criteria           | --                         | 16 (76)     |
| Limited search by language                      | --                         | 10 (48)     |
| Limited search by date                          | --                         | 5 (24)      |
| <b>Age/publication date of included studies</b> |                            |             |
| 0-5 years prior                                 | --                         | 3 (14)      |
| 6-10 years prior                                | --                         | 4 (19)      |
| 11+ years prior                                 | --                         | 9 (43)      |
| Not reported                                    | --                         | 5 (24)      |

223

224 Interventions examined in the included studies covered a range of virtual care  
 225 modalities (Table 2) including video and audio visits with clinicians (n=44), remote  
 226 monitoring programs (n=13), mobile applications (n=12), self-monitoring and wearable  
 227 devices (n=9), synchronous or asynchronous messaging with healthcare providers  
 228 (n=13), or patient portals (n=10). Care settings (Table 2) ranged from ambulatory and  
 229 outpatient clinics (n=41) to primary care (n=13), and home and community care settings  
 230 (n=8). Patient populations (Table 2) included individuals with chronic noncommunicable  
 231 conditions (n=19), cancer (n=7), and mental health conditions (n=5).

232 **Table 2: Summary of intervention and setting characteristics (n=66)**

|                                         | <b>Value<br/>[n (%)]</b> |
|-----------------------------------------|--------------------------|
| <b>Primary Condition/Health Concern</b> |                          |
| Cancer                                  | 7 (11)                   |
| Cardiac conditions                      | 3 (5)                    |
| Chronic pain/Musculoskeletal            | 3 (5)                    |
| Dermatologic conditions                 | 4 (6)                    |
| Diabetes                                | 5 (8)                    |
| Kidney disease                          | 3 (5)                    |
| Mental Health                           | 5 (8)                    |
| Palliative                              | 3 (5)                    |
| Specialist Clinic*                      | 8 (12)                   |
| Surgery - unspecified                   | 3 (5)                    |
| Multiple conditions                     | 11 (17)                  |
| Not applicable/unspecified              | 11 (17)                  |
| <b>Setting/Context of care delivery</b> |                          |
| Ambulatory care/outpatient clinic       | 40 (60)                  |
| Primary care                            | 13 (20)                  |
| Home and Community care                 | 7 (11)                   |
| Not applicable/not specified            | 6 (9)                    |
| <b>Type of Virtual Care Modality**</b>  |                          |
| Virtual visit/telemedicine – video      | 43 (65)                  |
| Virtual visit/telemedicine – audio only | 37 (56)                  |
| Remote monitoring                       | 11 (17)                  |
| Mobile application                      | 11 (17)                  |
| Self-monitoring/Wearables               | 8 (12)                   |
| Synchronous messaging                   | 4 (6)                    |

|                                                                                        |         |
|----------------------------------------------------------------------------------------|---------|
| Asynchronous messaging                                                                 | 9 (14)  |
| Patient Portals                                                                        | 10 (15) |
| Other/Not specified                                                                    | 7 (11)  |
| <b>Number of Interventions</b>                                                         |         |
| 1 or 2                                                                                 | 46 (70) |
| 3 or 4                                                                                 | 17 (25) |
| 5 to 7                                                                                 | 3 (5)   |
| *medical specialties include ENT, Gastroenterology, Neurology, Gynecology, and Urology |         |
| **percentage totals exceed 100 as studies included multiple modalities                 |         |

233

234 Connections between virtual care modalities (video visits etc.) within the Quintuple Aim

235 framework and NAM quality domains (effectiveness, patient centeredness etc.) are

236 visualized in Figure 2. Within the Quintuple Aim, the most reported category related to

237 patient experience (n=200 indicators), followed by provider experience (n=52),

238 population health outcomes (n=47), health system costs (n=22), and equity (n=7).

239 Virtual visits by phone and/or video (n=96) were the most common modality of virtual

240 care reported, and was strongly connected to patient experience, provider experience,

241 and population health outcomes (Fig 2). Virtual visits (video only) (n=60) and remote

242 monitoring (n=56) were the next most common, also connecting strongly to patient

243 experience, provider experience, and population health outcomes.

244 Within the NAM quality domains, the most common sub-coded domains included patient

245 centeredness (n=66), effectiveness (n=64), sustainability (n=36), and efficiency of care

246 (n=36) (Fig 2). Details regarding the frequency of indicators for NAM domains and

247 patient experience and provider experience are provided in Supplemental Material 2 –

248 Table 3, with examples of indicators and their stem groupings in Table 3.



249

**Figure 2: Alluvial diagram connecting virtual care modalities to the Quintuple Aim and quality domains.** Through the middle are the Quintuple Aim domains, with curved bars representing connection to the virtual care modality (left) and NAM quality domains (right). For example, the 59 mentions of remote monitoring (left) were mostly connected with patient experience, followed by population health outcomes, then provider experience. The thick vertical bars show the frequency compared to the other domains: virtual visits were the most common modality; patient experience was the most common Quintuple Aim domain; and effectiveness was the most common NAM quality domain.

258

**Table 3: Examples of indicator-stem groupings and indicators within the Quintuple Aim, specific to virtual care.**

| Examples of Indicator-Stem Grouping<br>(NAM Quality Domain)                                      | Examples of Individual Indicators                                        | Examples of Indicator Measurement                                                                                                                                                                                                                                                                                                                                                        |
|--------------------------------------------------------------------------------------------------|--------------------------------------------------------------------------|------------------------------------------------------------------------------------------------------------------------------------------------------------------------------------------------------------------------------------------------------------------------------------------------------------------------------------------------------------------------------------------|
| <b>Quintuple Aim domain: Patient Experience</b>                                                  |                                                                          |                                                                                                                                                                                                                                                                                                                                                                                          |
| Patient satisfaction<br>( <i>Patient centeredness</i> )<br><br>Usability<br>( <i>Efficient</i> ) | Patient satisfaction of virtual care compared to in-person consultations | 5-point Likert scale – proportion of positive responses:<br>"The clinical care I received during a virtual visit was the same as a face-to-face visit"<br><br>Telemedicine usability questionnaire: 18 items, 7-point Likert scale; higher mean score indicates higher satisfaction (usefulness, ease, interface quality, interaction quality, satisfaction and future use, reliability) |
| Effectiveness                                                                                    | Patient-perceived value of the virtual consultation.                     | Net promoter score – "recommend virtual visit to a friend"<br><br>Virtual visits are more convenient than an office visit                                                                                                                                                                                                                                                                |
| Access to care<br>( <i>Equitable</i> )                                                           | Ease of navigating access to a video appointment.                        | Proportion of patients requiring help with equipment<br><br>Proportion of patients experiencing difficulty logging on to platform                                                                                                                                                                                                                                                        |

|                                                               |                                                            |                                                                                                                                                                           |
|---------------------------------------------------------------|------------------------------------------------------------|---------------------------------------------------------------------------------------------------------------------------------------------------------------------------|
|                                                               | Support to patients to overcome technical issues.          |                                                                                                                                                                           |
| <b>Quintuple Aim domain: Provider Experience</b>              |                                                            |                                                                                                                                                                           |
| Provider satisfaction and preference                          | Provider satisfaction compared to in-person consultations. | 5-item questionnaire using 0-100 Visual Analog Scales – overall score calculated by averaging responses                                                                   |
| Infrastructure/organizational capacity ( <i>Sustainable</i> ) | Perceptions of effectiveness.                              | Telehealth Usability Questionnaire                                                                                                                                        |
|                                                               | Provider and clinic efficiency.                            | Reduction in ‘no-shows’ and cancelled appointments<br>Decrease in wait times for patients                                                                                 |
| Provider-patient workload/workflow (Timely, efficiency)       |                                                            |                                                                                                                                                                           |
| Physician perspective of effectiveness ( <i>Effective</i> )   | Ability to evaluate/examine patient.                       | Likert scales – proportion of physicians that agree:<br>I was confident with my ability to diagnose/make recommendations.<br>I was able to effectively inform my patient. |
| <b>Quintuple Aim domain: Population Health &amp; Outcomes</b> |                                                            |                                                                                                                                                                           |
| Follow-up Care                                                | 30- or 90-day outpatient follow-up.                        | Number or proportion of patients seen in follow-up after virtual visit                                                                                                    |
|                                                               | Emergency Department use after virtual visit.              | Number or proportion of patients seeking emergency care after virtual visit                                                                                               |
| Access to Care                                                | Program usage.                                             | Proportion of participants engaging with the platform/completing program                                                                                                  |
| Clinical outcomes and measures                                | Clinical effectiveness of care.                            | Changes in clinical outcomes/disease markers                                                                                                                              |
|                                                               | Quality of life.                                           | Changes in QoL as measured by validated scales: EQ-5D*, WHO-QL**                                                                                                          |
|                                                               | Patient safety.                                            | Incidence of adverse clinical events                                                                                                                                      |
| <b>Quintuple Aim domain: Cost</b>                             |                                                            |                                                                                                                                                                           |
| Health system costs                                           | Cost reduction.                                            | Cost of standard visit compared to virtual visit                                                                                                                          |
| Patient Costs                                                 | Cost-effectiveness.                                        | Cost of telemedicine implementation and maintenance                                                                                                                       |

|                                                                     |                           |                                                                             |
|---------------------------------------------------------------------|---------------------------|-----------------------------------------------------------------------------|
|                                                                     | Cost-avoidance.           | Patient travel savings compared to in-office visits                         |
| <b>Quintuple Aim domain: Equity</b>                                 |                           |                                                                             |
| Accessibility                                                       | Equal access to care.     | Availability of appropriate connectivity/ technical services in rural areas |
| Financial impact                                                    | Time saved by the patient | Reduction in travel time                                                    |
| *EQ-5D: EuroQol-5 Dimensions – health-related quality of life scale |                           |                                                                             |
| **WHO-QL: World Health Organization-Quality of Life scale           |                           |                                                                             |

261

## 262 Specific Instruments Measuring Quality

263 Throughout data extraction, several existing tools were mentioned for measuring quality  
 264 of care. For patient experience tools included Telemedicine/Telehealth usability  
 265 questionnaires (n=18 studies); Telemedicine Satisfaction and Usefulness Questionnaire  
 266 (n=3); and Service user technology acceptability questionnaire (n=1). For provider  
 267 experience the Telemedicine/Telehealth Usability Questionnaire (n=2) was used, while  
 268 others only mention 5- and 10-point Likert scales with unique or custom question  
 269 prompts. No specific measurement tools were mentioned for population health  
 270 outcomes, costs, or health equity.

## 271 DISCUSSION

272 We conducted a scoping review on quality measures for virtual care and found that  
 273 within the Quintuple Aim, the most reported category assessing quality of virtual care  
 274 was related to patient experience, followed by provider experience, and population  
 275 health outcomes. There was limited mention of health system costs, patient costs, and  
 276 equity. The most frequently mentioned virtual care modality was virtual visits in video  
 277 and/or audio, followed by video visits only, remote monitoring programs, mobile

1  
2  
3 278 applications, and self-monitoring tools. Within the National Academies of Medicine  
4  
5 279 domains of quality for patient and provider experience, effectiveness was most  
6  
7  
8 280 common, followed by patient centeredness and efficiency, with limited mention of  
9  
10 281 sustainability.

### 12 282 **Limited Attention on Equity, Sustainability and Cost**

14 283 Most quality indicators concentrated in specific domains such as patient experience  
15  
16 284 and/or satisfaction, provider experience and/or satisfaction, while the more complex  
17  
18  
19 285 indicators, such as equity, cost, and sustainability, were not as widely reported. The  
20  
21 286 limited attention on equity is consistent with published literature, such as a scoping  
22  
23  
24 287 review of reviews highlighting the gaps of focus to equity assessments in virtual care  
25  
26 288 deployments (18). The lack of consideration of equity is a missed opportunity, since  
27  
28 289 virtual care has the potential to improve access to care for some typically underserved  
29  
30  
31 290 populations and worsen access for others (19). Equity is often difficult to measure and  
32  
33 291 integrate into program evaluations, as it is difficult to assess within a few questions or  
34  
35 292 survey deployments that are pragmatic to measure, and may have been outside the  
36  
37  
38 293 scope of QI projects or time-sensitive deployments (such as during the COVID-19  
39  
40 294 pandemic) (20).

42 295 Our review also found a lack of focus on sustainability of virtual care. Sustainability can  
43  
44 296 be considered from multiple perspectives, including if the patient plans to continue to  
45  
46  
47 297 use the virtual options, and if the organization has the means (infrastructure, IT support  
48  
49 298 etc.) to continue to deliver virtual care, particularly beyond the COVID-19 pandemic.  
50  
51 299 Further indicators are needed to monitor the continued need for and use of virtual care  
52  
53  
54 300 to assess if it remains a preferred and feasible option especially with hybrid-models of  
55  
56  
57  
58  
59  
60

1  
2  
3 301 care delivery which includes both virtual and in person options. Considering  
4  
5 302 sustainability is important for Learning Health Systems (LHS) approaches being  
6  
7 303 implemented across healthcare organizations and systems (21). Sustainability needs to  
8  
9 304 be a key part of this systems-based approach, and thus quality indicators of virtual care  
10  
11 305 that consider sustainability are needed, yet there are few examples in the literature.  
12  
13  
14 306 The limited focus on the Quintuple Aim domain of cost was also not noted; cost may be  
15  
16 307 difficult to measure and quantify in rapid virtual care deployments. This finding is  
17  
18 308 consistent with a 2020 scoping review which analyzed the cost-effectiveness of  
19  
20 309 telehealth to the healthcare system(22). Cost should be considered within quality  
21  
22 310 indicators, including in connection with sustainability of the service.  
23  
24  
25

### 26 311 **Evidence Synthesis of Virtual Care**

27  
28 312 There has been considerable synthesis in analyzing virtual care. About a third of  
29  
30 313 literature included in this scoping review were reviews themselves, however, these  
31  
32 314 reviews usually focused on a specific service or modality of virtual care such as patient  
33  
34 315 portals (23), telehealth/phone visits (24,25) and video consultations (26,27). Very few  
35  
36 316 reviews assessed approaches or models for evaluating virtual care, or tools which  
37  
38 317 specifically measured quality as identified by the quintuple aim and NAM. Reviews that  
39  
40 318 did explore evaluation or quality did so on a limited basis. To the authors' knowledge,  
41  
42 319 this is the first review which specifically evaluates quality in virtual care with a  
43  
44 320 comprehensive approach in defining quality indicators and assessing their deployment  
45  
46 321 in the extant literature against established quality frameworks.  
47  
48  
49  
50

51 322 A report by the Canadian Agency for Drugs and Technology in Health (CADTH) which  
52  
53 323 studied evaluations of virtual care was consistent with our findings (28). The CADTH  
54  
55  
56  
57  
58  
59  
60

1  
2  
3 324 report stated that evaluations should focus on ensuring the scope of the virtual care  
4  
5 325 visits was appropriate for the care being administered, be conducted systematically, and  
6  
7 326 that cost-analysis or cost-benefit evaluations be conducted with a specific viewpoint in  
8  
9  
10 327 mind – such as a patient or provider (28). The findings of this scoping review support  
11  
12 328 these assertions from a quality perspective. A quality virtual care program is clear in its  
13  
14  
15 329 scope, has dedicated resources for cyclical evaluations, and specifically investigates the  
16  
17 330 impact of the program from the patient perspective, provider perspective, or both.

### 19 331 **Leveraging Review Results: Next Steps**

21 332 This review provides the foundational knowledge base of existing quality indicators of  
22  
23 333 virtual care across domains of quality and organized within established Quality  
24  
25  
26 334 frameworks. This knowledge base will be further refined and distilled through a modified  
27  
28 335 Delphi approach, which will collate and rank the existing indicators into a subset, which  
29  
30 336 can then be disseminated as a balanced score card for evaluating the quality of virtual  
31  
32 337 care. An understanding of quality domains in virtual care and the subsequent quality  
33  
34 338 indicators are key to the development and growth of a potential Learning health system  
35  
36 339 (LHS), which enables cycles of continuous learning and improvement to be routinised  
37  
38 340 and embedded across the healthcare system (29). A LHS is the combination of a health  
39  
40 341 system and research system that, at all levels, is anchored on patient's needs,  
41  
42 342 perspectives, and aspirations; driven by timely data and evidence; supported by  
43  
44 343 appropriate decision supports, aligned governance, financial and care delivery  
45  
46  
47 344 arrangements; and enabled with a culture of, and competencies for, rapid learning and  
48  
49 345 improvement (30). Further, it is a system in which science, informatics, incentives, and  
50  
51  
52 346 culture are aligned for continuous improvement and innovation, and thus our domains of  
53  
54  
55  
56  
57  
58  
59  
60

1  
2  
3 347 quality for virtual care can be integrated into this approach. Ideally, best practices,  
4  
5 348 including best practices in virtual care, are seamlessly embedded in the delivery  
6  
7 349 process, patients and families are active participants in all elements, and new  
8  
9  
10 350 knowledge capture is an integral by-product of delivery experience (29). Ultimately, the  
11  
12 351 deployment of virtual care should follow a Learning Health System approach, with  
13  
14 352 consistent revision and adjustment of virtual care initiatives to reflect dynamic contexts.  
15  
16  
17 353 Mapping the current knowledge base provides organizations quick references for  
18  
19 354 improving and iterating their virtual care program. Working towards true integration of  
20  
21 355 virtual care into a Learning Health System is subject to further research and  
22  
23 356 implementation. A modified-Delphi consensus process is currently underway to confirm  
24  
25  
26 357 indicators based on feasibility, relevance, and utility which will lead to the development  
27  
28 358 of a balanced scorecard of virtual care indicators across quality domains.  
29  
30  
31 359 This work provides the foundation for identification and refinement of selection of quality  
32  
33 360 indicators in virtual care and highlights current gaps in assessment of virtual care  
34  
35 361 performance indicators. Existing literature identified in this review had a focus on the  
36  
37 362 effectiveness and patient satisfaction and/or experience of virtual care but has not  
38  
39 363 explored cost or equity to the same degree. Further development of evaluation methods  
40  
41 364 specifically analyzing the equitable and cost-efficient deployment of virtual care are  
42  
43 365 needed to integrate virtual care into an LHS.  
44  
45  
46  
47 366 Best practice guidelines for virtual care are required to realize integration of virtual care  
48  
49 367 across health systems (31,32). Ensuring that virtual care is deployed in a satisfactory  
50  
51 368 fashion for patients and providers requires a prioritization of quality, something that this  
52  
53 369 scoping review provides a foundation for. Measurement of quality of virtual care will  
54  
55  
56  
57  
58  
59  
60



1  
2  
3 370 support understanding performance gaps, and targets for future quality improvement  
4  
5 371 efforts and benchmarking efforts across organizations.  
6

## 7 372 **Strengths and Limitations**

8  
9  
10 373 This scoping review used a wide range of published and grey sources, covered a vast  
11  
12 374 breadth of literature, and applied rigorous methods for data extraction and coding. The  
13  
14 375 body of literature included in this review also represents the current state of publications  
15  
16 376 on virtual care, as the search was updated as the project progressed. However, our  
17  
18 377 search strategy was limited to English only, and relying on the past seven years meant  
19  
20 378 that foundational work on the implementation of virtual care may have been excluded.  
21  
22 379 A key strength of this work was our categorization of existing indicators across  
23  
24 380 established quality frameworks (NAM and sustainability, Quintuple Aim) to identify  
25  
26 381 which quality domains of virtual care are present and lacking within the current  
27  
28 382 literature. Other published reviews did not categorize indicators and/or report  
29  
30 383 specifically tools that measure quality. However, there is considerable overlap between  
31  
32 384 the NAM domains for categorization and heterogeneity in the way indicators were  
33  
34 385 explained in the published studies, typically with very little detail. Indicators were  
35  
36 386 regularly found to fit within more than one domain, and the lack of detail provided about  
37  
38 387 each indicator means that some assumptions were made, leading to subjectivity with  
39  
40 388 current results but we dual-coded all indicators and resolved discrepancy with a third  
41  
42 389 reviewer. The lack of reporting on how indicators were selected when measuring quality  
43  
44 390 of care, and the lack of reported knowledge user (patient, provider, management etc.)  
45  
46 391 involvement, further highlighted the need for a consensus-based approach to finalize a  
47  
48 392 concise list of virtual care quality indicators across all quality domains.  
49  
50  
51  
52  
53  
54  
55  
56  
57  
58  
59  
60



1  
2  
3 393 **CONCLUSION**  
4

5 394 Patients and providers have expressed satisfaction and acceptability with virtual care  
6  
7 395 and would prefer the option of hybrid approach of in-person and virtual care (3,4,33). To  
8  
9 396 ensure high quality virtual care, it is imperative to understand what we mean by “quality”  
10  
11 397 in virtual care. Before identifying a set of virtual care quality indicators, this review  
12  
13 398 highlights gaps in virtual care assessments across modalities. We noted that patient  
14  
15 399 experience is the most reported aspect of the Quintuple Aim, with effectiveness, patient  
16  
17 400 centeredness, and efficiency being the most common quality domains. The lack of  
18  
19 401 indicators related to equity and sustainability highlight the need for development of new  
20  
21 402 indicators, and a consensus-based process with knowledge users to create a prioritized  
22  
23 403 list. This paper provides healthcare teams and organizations a collated list of virtual  
24  
25 404 care quality indicators to reference in local implementations and evaluations. Further  
26  
27 405 stratification of the quality indicators through a modified Delphi approach will provide  
28  
29 406 decision-makers with a validated scorecard for the implementation of quality virtual care  
30  
31 407 initiatives moving forward.  
32  
33  
34  
35  
36  
37  
38  
39  
40  
41  
42  
43  
44  
45  
46  
47  
48  
49  
50  
51  
52  
53  
54  
55  
56  
57  
58  
59  
60

1  
2  
3 408 **Author Contributions**  
4

5 409 Conceptualization: Geetha Mukerji  
6

7 410 Formal Analysis: Sam Petrie, Celia Laur, Patricia Rios  
8

9 411 Funding Acquisition: Geetha Mukerji  
10

11 412 Investigation: Sam Petrie, Celia Laur, Toni Makanjoula, Patricia Rios, Geetha Mukerji,  
12

13 413 Ally Suarez  
14

15 414 Writing – Original Draft Preparation: Sam Petrie, Celia Laur  
16

17 415 Writing – Reviewing & Editing: Celia Laur, Patricia Rios, Ally Suarez, Toni Makanjoula,  
18

19 416 Geetha Mukerji, Onil Bhattacharyya, Emeraldalda Burke  
20

21 417  
22  
23

24 418 **Acknowledgements**  
25

26 419 We would like to thank the following for their assistance with this manuscript: Vanessa  
27

28 420 Kishimoto for assistance with title and abstract screening and Becky Skidmore for  
29

30 421 assistance with developing the literature search.  
31

32 422  
33  
34

35 423 **FUNDING**  
36

37 424 This study was supported by a grant from the Innovation Fund of the Alternative  
38

39 425 Funding Plan for the Academic Health Sciences Centres of Ontario  
40

41 426  
42  
43  
44

45 427 **CONFLICT OF INTEREST**  
46

47 428 The authors have no conflict of interest to declare.  
48  
49  
50  
51  
52  
53  
54  
55  
56  
57  
58  
59  
60

429 **REFERENCES**

- 430 1. Jamieson T, Wallace R, Armstrong K, Agarwal P, Griffin B, Wong I, et al. Virtual  
431 Care: A Framework for a Patient-Centric System [Internet]. Women's College  
432 Hospital Institute for Health Systems Solutions and Virtual Care; 2015 Jun p. 121.  
433 Available from:  
434 [https://www.womenscollegehospital.ca/assets/pdf/wihv/WIHV\\_VirtualHealthSymposium.pdf](https://www.womenscollegehospital.ca/assets/pdf/wihv/WIHV_VirtualHealthSymposium.pdf)  
435
- 436 2. Bhatia RS, Chu C, Pang A, Tadrous M, Stamenova V, Cram P. Virtual care use  
437 before and during the COVID-19 pandemic: a repeated cross-sectional study. *CMAJ*  
438 *Open*. 2021;9(1):E107–14.
- 439 3. Canadian Medical Association, Abacus Data. What Canadians Think about Virtual  
440 Health Care [Internet]. 2020 May. Available from: [https://abacusdata.ca/wp-](https://abacusdata.ca/wp-content/uploads/2020/06/CMA-Abacus-May-2020-Jun-4-ENv2.pdf)  
441 [content/uploads/2020/06/CMA-Abacus-May-2020-Jun-4-ENv2.pdf](https://abacusdata.ca/wp-content/uploads/2020/06/CMA-Abacus-May-2020-Jun-4-ENv2.pdf)
- 442 4. Ashcroft R, Ryan B, Mehta K, Brown J, Lam S, Dolovich L, et al. “Healthcare at its  
443 finest”: Patient perspectives on virtual care appointments in primary care. In: COVID-  
444 19 [Internet]. American Academy of Family Physicians; 2022 [cited 2023 May 5]. p.  
445 2944. Available from: <http://www.annfammed.org/lookup/doi/10.1370/afm.20.s1.2944>
- 446 5. Abrams K, Burrill S, Elsner N. What can health systems do to encourage physicians  
447 to embrace virtual care? [Internet]. Deloitte Center for Health Solutions; 2018 p. 24.  
448 Available from:  
449 [https://www2.deloitte.com/content/dam/insights/us/articles/4407\\_Virtual-care-](https://www2.deloitte.com/content/dam/insights/us/articles/4407_Virtual-care-survey/DI_Virtual-care-survey.pdf)  
450 [survey/DI\\_Virtual-care-survey.pdf](https://www2.deloitte.com/content/dam/insights/us/articles/4407_Virtual-care-survey/DI_Virtual-care-survey.pdf)
- 451 6. Government of Canada. Pan-Canadian virtual care priorities in response to COVID-  
452 19 [Internet]. 2021. Available from: [https://www.canada.ca/en/health-](https://www.canada.ca/en/health-canada/corporate/transparency/health-agreements/bilateral-agreement-pan-canadian-virtual-care-priorities-covid-19.html)  
453 [canada/corporate/transparency/health-agreements/bilateral-agreement-pan-](https://www.canada.ca/en/health-canada/corporate/transparency/health-agreements/bilateral-agreement-pan-canadian-virtual-care-priorities-covid-19.html)  
454 [canadian-virtual-care-priorities-covid-19.html](https://www.canada.ca/en/health-canada/corporate/transparency/health-agreements/bilateral-agreement-pan-canadian-virtual-care-priorities-covid-19.html)
- 455 7. Agency for Healthcare Research and Quality. Quality Indicator Measures [Internet].  
456 Available from: [https://qualityindicators.ahrq.gov/measures/qi\\_resources](https://qualityindicators.ahrq.gov/measures/qi_resources)
- 457 8. Canadian Institute for Health Information. What is an Indicator? [Internet]. Available  
458 from: [https://www.cihi.ca/en/access-data-and-reports/health-system-performance-](https://www.cihi.ca/en/access-data-and-reports/health-system-performance-measurement/what-is-an-indicator)  
459 [measurement/what-is-an-indicator](https://www.cihi.ca/en/access-data-and-reports/health-system-performance-measurement/what-is-an-indicator)
- 460 9. Pflugeisen BM, Mou J. Patient Satisfaction with Virtual Obstetric Care. *Matern Child*  
461 *Health J*. 2017 Jul;21(7):1544–51.
- 462 10. Saiyed S, Nguyen A, Singh R. Physician Perspective and Key Satisfaction  
463 Indicators with Rapid Telehealth Adoption During the Coronavirus Disease 2019  
464 Pandemic. *Telemed J E-Health Off J Am Telemed Assoc*. 2021 Nov;27(11):1225–34.

- 1  
2  
3 465 11. Parmanto B, Lewis ANJ, Graham KM, Bertolet MH. Development of the  
4 466 Telehealth Usability Questionnaire (TUQ). *Int J Telerehabilitation*. 2016;8(1):3–10.  
5
- 6  
7 467 12. Falk W. The State of Virtual Care in Canada as of Wave Three of the COVID-19  
8 468 Pandemic: An early diagnostic and policy recommendations [Internet]. Ottawa,  
9 469 Ontario: Health Canada; 2021 Jun p. 88. Report No.: H22-4/26-2021E-PDF.  
10 470 Available from: [publications.gc.ca/pub?id=9.902532&sl=0](https://publications.gc.ca/pub?id=9.902532&sl=0)  
11
- 12 471 13. Aromataris E, Munn Z, editors. *JBI Manual for Evidence Synthesis* [Internet]. JBI;  
13 472 2020 [cited 2023 May 5]. Available from: [https://jbi-global-](https://jbi-global-wiki.refined.site/space/MANUAL)  
14 473 [wiki.refined.site/space/MANUAL](https://jbi-global-wiki.refined.site/space/MANUAL)  
15
- 16  
17 474 14. Tricco AC, Langlois EtienneV, Straus SE, Alliance for Health Policy and Systems  
18 475 Research, World Health Organization. *Rapid reviews to strengthen health policy and*  
19 476 *systems: a practical guide* [Internet]. Geneva: World Health Organization; 2017 [cited  
20 477 2023 May 5]. Available from: <https://apps.who.int/iris/handle/10665/258698>  
21
- 22 478 15. Tricco AC, Lillie E, Zarin W, O'Brien KK, Colquhoun H, Levac D, et al. PRISMA  
23 479 Extension for Scoping Reviews (PRISMA-ScR): Checklist and Explanation. *Ann*  
24 480 *Intern Med*. 2018 Oct 2;169(7):467–73.  
25
- 26  
27 481 16. Nundy S, Cooper LA, Mate KS. The Quintuple Aim for Health Care Improvement:  
28 482 A New Imperative to Advance Health Equity. *JAMA*. 2022 Feb 8;327(6):521–2.  
29
- 30 483 17. Institute of Medicine (U.S.), editor. *Crossing the quality chasm: a new health*  
31 484 *system for the 21st century*. Washington, D.C: National Academy Press; 2001. 337 p.  
32
- 33 485 18. Budhwani S, Fujioka J, Thomas-Jacques T, De Vera K, Challa P, De Silva R, et  
34 486 al. Challenges and strategies for promoting health equity in virtual care: findings and  
35 487 policy directions from a scoping review of reviews. *J Am Med Inform Assoc JAMIA*.  
36 488 2022 Apr 13;29(5):990–9.  
37
- 38  
39 489 19. Saeed SA, Masters RM. Disparities in Health Care and the Digital Divide. *Curr*  
40 490 *Psychiatry Rep*. 2021 Jul 23;23(9):61.  
41
- 42 491 20. Crawford A, Serhal E. Digital Health Equity and COVID-19: The Innovation Curve  
43 492 Cannot Reinforce the Social Gradient of Health. *J Med Internet Res*. 2020 Jun  
44 493 2;22(6):e19361.  
45
- 46  
47 494 21. Shaw J, Brewer LC, Veinot T. Recommendations for Health Equity and Virtual  
48 495 Care Arising From the COVID-19 Pandemic: Narrative Review. *JMIR Form Res*.  
49 496 2021 Apr 5;5(4):e23233.  
50
- 51 497 22. Snoswell CL, Taylor ML, Comans TA, Smith AC, Gray LC, Caffery LJ.  
52 498 Determining if Telehealth Can Reduce Health System Costs: Scoping Review. *J Med*  
53 499 *Internet Res*. 2020 Oct 19;22(10):e17298.  
54  
55  
56  
57  
58  
59  
60

- 1  
2  
3 500 23. Mold F, de Lusignan S, Sheikh A, Majeed A, Wyatt JC, Quinn T, et al. Patients'  
4 501 online access to their electronic health records and linked online services: a  
5 502 systematic review in primary care. *Br J Gen Pract J R Coll Gen Pract*. 2015  
6 503 Mar;65(632):e141-151.
- 7  
8  
9 504 24. Haroon S, Voo TC, Chua H, Tan GL, Lau T. Telemedicine and Haemodialysis  
10 505 Care during the COVID-19 Pandemic: An Integrative Review of Patient Safety,  
11 506 Healthcare Quality, Ethics and the Legal Considerations in Singapore Practice. *Int J*  
12 507 *Environ Res Public Health*. 2022;19(9).
- 13  
14 508 25. Allen Watts K, Malone E, Dionne-Odom JN, McCammon S, Currie E, Hicks J, et  
15 509 al. Can you hear me now?: Improving palliative care access through telehealth. *Res*  
16 510 *Nurs Health*. 2021;44(1):226–37.
- 17  
18  
19 511 26. Andrees V, Klein TM, Augustin M, Otten M. Live interactive teledermatology  
20 512 compared to in-person care - a systematic review. *J Eur Acad Dermatol Venereol*  
21 513 *J EADV*. 2020 Apr;34(4):733–45.
- 22  
23 514 27. Barsom EZ, van Hees E, Bemelman WA, Schijven MP. Measuring patient  
24 515 satisfaction with video consultation: a systematic review of assessment tools and  
25 516 their measurement properties. *Int J Technol Assess Health Care*. 2020 Jun 23;1–7.
- 26  
27  
28 517 28. Hui D, Dolcine B, Loshak H. Approaches to Evaluations of Virtual Care in  
29 518 Primary Care. *Can J Health Technol*. 2022 Jan 12;2(1):es0358.
- 30  
31 519 29. Best Care at Lower Cost: The Path to Continuously Learning Health Care in  
32 520 America [Internet]. Washington, D.C.: National Academies Press; 2013 [cited 2023  
33 521 May 5]. Available from: <http://www.nap.edu/catalog/13444>
- 34  
35 522 30. Lavis JN, Gauvin FP, Mattison CA, Moat KA, Waddell K, Wilson MG, et al. Rapid  
36 523 synthesis: Creating rapid-learning health systems in Canada [Internet]. Hamilton,  
37 524 Canada: McMaster Health Forum; 2018 Dec p. 36. Available from:  
38 525 [https://www.mcmasterforum.org/docs/default-source/product-documents/rapid-](https://www.mcmasterforum.org/docs/default-source/product-documents/rapid-responses/creating-rapid-learning-health-systems-in-canada.pdf?sfvrsn=4)  
39 526 [responses/creating-rapid-learning-health-systems-in-canada.pdf?sfvrsn=4](https://www.mcmasterforum.org/docs/default-source/product-documents/rapid-responses/creating-rapid-learning-health-systems-in-canada.pdf?sfvrsn=4)
- 40  
41  
42 527 31. Petrie S, Carson D, Peters P, Hurtig AK, LeBlanc M, Simpson H, et al. What a  
43 528 Pandemic Has Taught Us About the Potential for Innovation in Rural Health:  
44 529 Commencing an Ethnography in Canada, the United States, Sweden, and Australia.  
45 530 *Front Public Health*. 2021;9:1836.
- 46  
47  
48 531 32. Enhancing equitable access to virtual care in Canada: Principle-based  
49 532 recommendations for equity [Internet]. 2021. Available from:  
50 533 <https://policybase.cma.ca/link/policy14447>
- 51  
52 534 33. Fujioka JK, Nguyen M, Phung M, Bhattacharyya O, Kelley L, Stamenova V, et al.  
53 535 Redesigning primary care: Provider perspectives on the clinical utility of virtual visits.  
54 536 *Can Fam Physician*. 2023 Apr;69(4):e78–85.

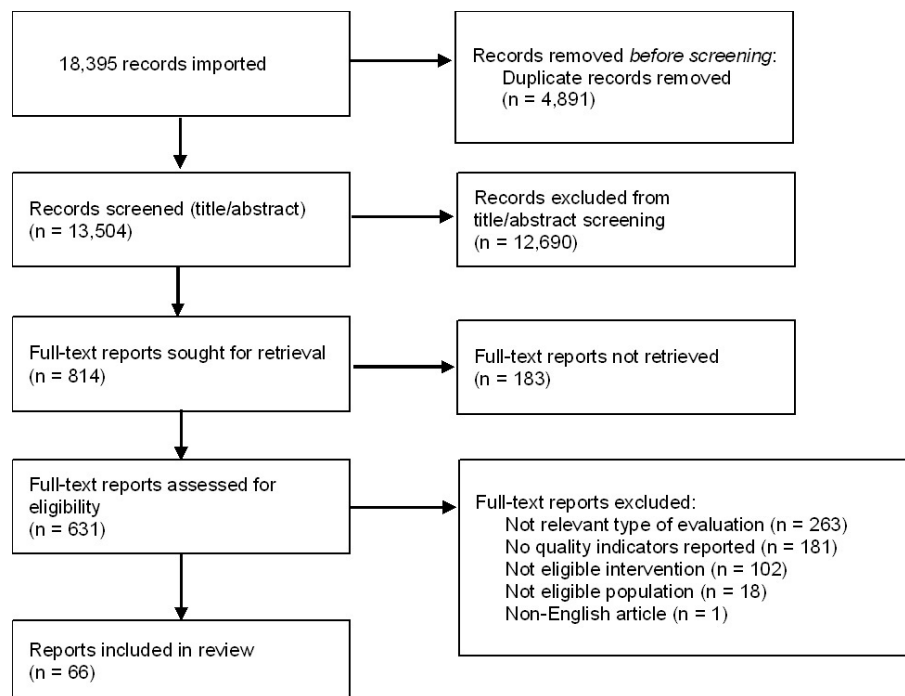

Figure 1: PRISMA study flow diagram

91x65mm (300 x 300 DPI)

1  
2  
3  
4  
5  
6  
7  
8  
9  
10  
11  
12  
13  
14  
15  
16  
17  
18  
19  
20  
21  
22  
23  
24  
25  
26  
27  
28  
29  
30  
31  
32  
33  
34  
35  
36  
37  
38  
39  
40  
41  
42  
43  
44  
45  
46  
47  
48  
49  
50  
51  
52  
53  
54  
55  
56  
57  
58  
59  
60

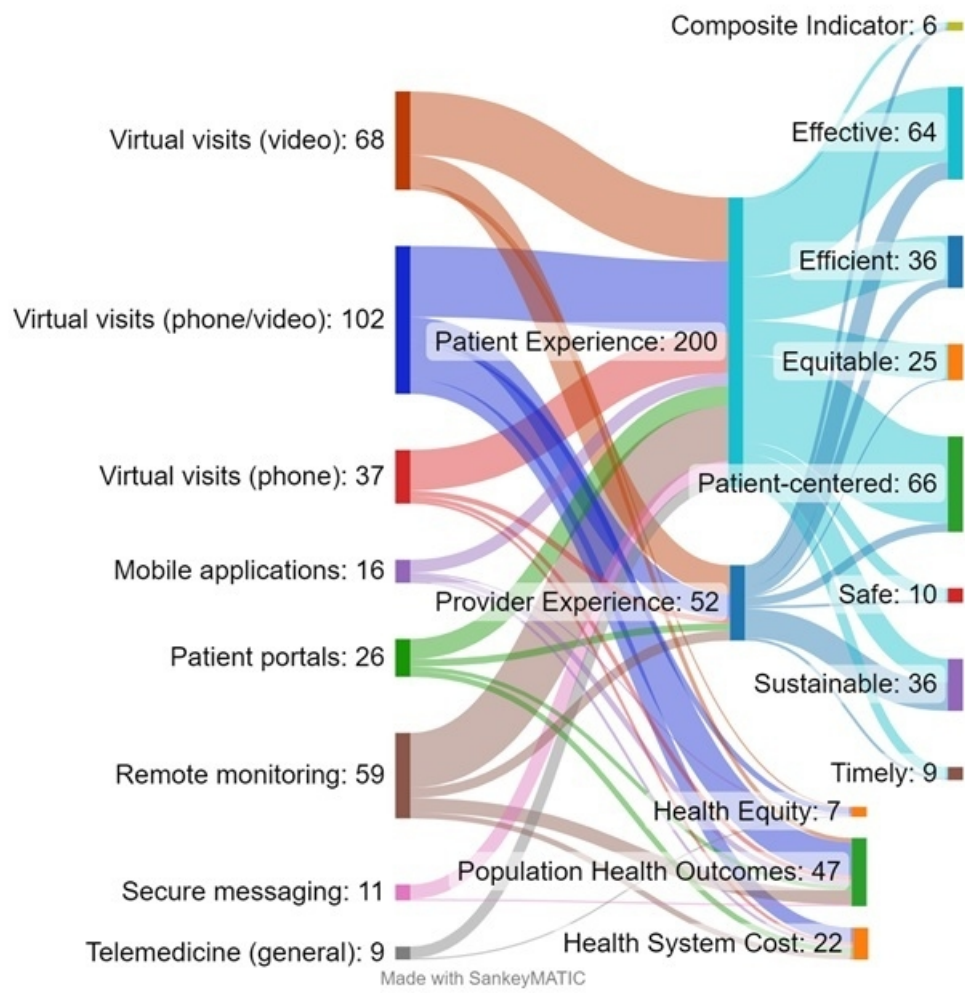

Figure 2: Alluvial diagram connecting virtual care modalities to the Quintuple Aim and quality domains.

52x52mm (300 x 300 DPI)



**S1 Table - Preferred Reporting Items for Systematic reviews and Meta-Analyses extension for Scoping Reviews (PRISMA-ScR) Checklist**

| SECTION                           | ITEM | PRISMA-ScR CHECKLIST ITEM                                                                                                                                                                                                                                                                                  | REPORTED ON PAGE #       |
|-----------------------------------|------|------------------------------------------------------------------------------------------------------------------------------------------------------------------------------------------------------------------------------------------------------------------------------------------------------------|--------------------------|
| <b>TITLE</b>                      |      |                                                                                                                                                                                                                                                                                                            |                          |
| Title                             | 1    | Identify the report as a scoping review.                                                                                                                                                                                                                                                                   | 1                        |
| <b>ABSTRACT</b>                   |      |                                                                                                                                                                                                                                                                                                            |                          |
| Structured summary                | 2    | Provide a structured summary that includes (as applicable): background, objectives, eligibility criteria, sources of evidence, charting methods, results, and conclusions that relate to the review questions and objectives.                                                                              | 2-3                      |
| <b>INTRODUCTION</b>               |      |                                                                                                                                                                                                                                                                                                            |                          |
| Rationale                         | 3    | Describe the rationale for the review in the context of what is already known. Explain why the review questions/objectives lend themselves to a scoping review approach.                                                                                                                                   | 4-6                      |
| Objectives                        | 4    | Provide an explicit statement of the questions and objectives being addressed with reference to their key elements (e.g., population or participants, concepts, and context) or other relevant key elements used to conceptualize the review questions and/or objectives.                                  | 5-6                      |
| <b>METHODS</b>                    |      |                                                                                                                                                                                                                                                                                                            |                          |
| Protocol and registration         | 5    | Indicate whether a review protocol exists; state if and where it can be accessed (e.g., a Web address); and if available, provide registration information, including the registration number.                                                                                                             | N/A                      |
| Eligibility criteria              | 6    | Specify characteristics of the sources of evidence used as eligibility criteria (e.g., years considered, language, and publication status), and provide a rationale.                                                                                                                                       | 7                        |
| Information sources*              | 7    | Describe all information sources in the search (e.g., databases with dates of coverage and contact with authors to identify additional sources), as well as the date the most recent search was executed.                                                                                                  | 6                        |
| Search                            | 8    | Present the full electronic search strategy for at least 1 database, including any limits used, such that it could be repeated.                                                                                                                                                                            | Supplementary Material 2 |
| Selection of sources of evidence† | 9    | State the process for selecting sources of evidence (i.e., screening and eligibility) included in the scoping review.                                                                                                                                                                                      | 7-8                      |
| Data charting process‡            | 10   | Describe the methods of charting data from the included sources of evidence (e.g., calibrated forms or forms that have been tested by the team before their use, and whether data charting was done independently or in duplicate) and any processes for obtaining and confirming data from investigators. | 8-9                      |
| Data items                        | 11   | List and define all variables for which data were sought and any assumptions and simplifications made.                                                                                                                                                                                                     | 8-9                      |
| Critical appraisal of individual  | 12   | If done, provide a rationale for conducting a critical appraisal of included sources of evidence; describe                                                                                                                                                                                                 | N/A                      |



| SECTION                                       | ITEM | PRISMA-ScR CHECKLIST ITEM                                                                                                                                                                       | REPORTED ON PAGE # |
|-----------------------------------------------|------|-------------------------------------------------------------------------------------------------------------------------------------------------------------------------------------------------|--------------------|
| sources of evidence§                          |      | the methods used and how this information was used in any data synthesis (if appropriate).                                                                                                      |                    |
| Synthesis of results                          | 13   | Describe the methods of handling and summarizing the data that were charted.                                                                                                                    | 9                  |
| <b>RESULTS</b>                                |      |                                                                                                                                                                                                 |                    |
| Selection of sources of evidence              | 14   | Give numbers of sources of evidence screened, assessed for eligibility, and included in the review, with reasons for exclusions at each stage, ideally using a flow diagram.                    | 9-10               |
| Characteristics of sources of evidence        | 15   | For each source of evidence, present characteristics for which data were charted and provide the citations.                                                                                     | 10-12              |
| Critical appraisal within sources of evidence | 16   | If done, present data on critical appraisal of included sources of evidence (see item 12).                                                                                                      | N/A                |
| Results of individual sources of evidence     | 17   | For each included source of evidence, present the relevant data that were charted that relate to the review questions and objectives.                                                           | 13-18              |
| Synthesis of results                          | 18   | Summarize and/or present the charting results as they relate to the review questions and objectives.                                                                                            | 13-18              |
| <b>DISCUSSION</b>                             |      |                                                                                                                                                                                                 |                    |
| Summary of evidence                           | 19   | Summarize the main results (including an overview of concepts, themes, and types of evidence available), link to the review questions and objectives, and consider the relevance to key groups. | 18-22              |
| Limitations                                   | 20   | Discuss the limitations of the scoping review process.                                                                                                                                          | 23                 |
| Conclusions                                   | 21   | Provide a general interpretation of the results with respect to the review questions and objectives, as well as potential implications and/or next steps.                                       | 24                 |
| <b>FUNDING</b>                                |      |                                                                                                                                                                                                 |                    |
| Funding                                       | 22   | Describe sources of funding for the included sources of evidence, as well as sources of funding for the scoping review. Describe the role of the funders of the scoping review.                 | N/A                |

JB1 = Joanna Briggs Institute; PRISMA-ScR = Preferred Reporting Items for Systematic reviews and Meta-Analyses extension for Scoping Reviews.

\* Where *sources of evidence* (see second footnote) are compiled from, such as bibliographic databases, social media platforms, and Web sites.

† A more inclusive/heterogeneous term used to account for the different types of evidence or data sources (e.g., quantitative and/or qualitative research, expert opinion, and policy documents) that may be eligible in a scoping review as opposed to only studies. This is not to be confused with *information sources* (see first footnote).

‡ The frameworks by Arksey and O'Malley (6) and Levac and colleagues (7) and the JBI guidance (4, 5) refer to the process of data extraction in a scoping review as data charting.

§ The process of systematically examining research evidence to assess its validity, results, and relevance before using it to inform a decision. This term is used for items 12 and 19 instead of "risk of bias" (which is more applicable to systematic reviews of interventions) to include and acknowledge the various sources of evidence that may be used in a scoping review (e.g., quantitative and/or qualitative research, expert opinion, and policy document).

From: Tricco AC, Lillie E, Zarin W, O'Brien KK, Colquhoun H, Levac D, et al. PRISMA Extension for Scoping Reviews (PRISMA-ScR): Checklist and Explanation. *Ann Intern Med.* 2018;169:467-473. doi: [10.7326/M18-0850](https://doi.org/10.7326/M18-0850).

**Figure 1 – Screening Criteria**

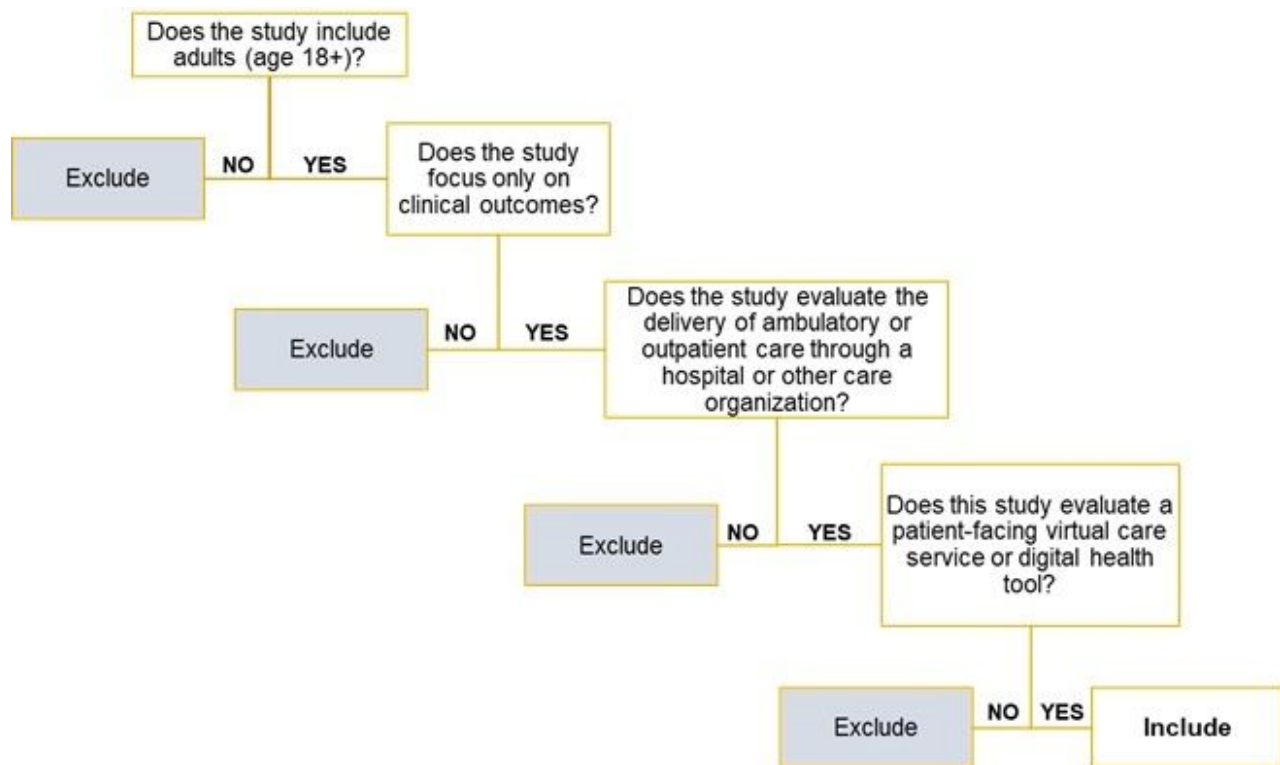

**Table 1 – Medline Search strategy**

**Ovid MEDLINE: Epub Ahead of Print, In-Process & Other Non-Indexed Citations, Ovid MEDLINE® Daily and Ovid MEDLINE® 1946-Present**

| # | Query                                                                                                                                                                                                                                                                                                                                                                                                                                                                                                           |
|---|-----------------------------------------------------------------------------------------------------------------------------------------------------------------------------------------------------------------------------------------------------------------------------------------------------------------------------------------------------------------------------------------------------------------------------------------------------------------------------------------------------------------|
| 1 | exp telemedicine/                                                                                                                                                                                                                                                                                                                                                                                                                                                                                               |
| 2 | exp internet-based intervention/                                                                                                                                                                                                                                                                                                                                                                                                                                                                                |
| 3 | (remot* adj2 (consult* or interact* or diagnos* or monitor* or treat* or therap* or care)).tw,kf.                                                                                                                                                                                                                                                                                                                                                                                                               |
| 4 | (telemonitor* or telemedicine* or telecommunication* or telehealth*).tw,kf.                                                                                                                                                                                                                                                                                                                                                                                                                                     |
| 5 | (((((remote or online or video* or text message* or telephone* or phone or phones or email* or virtual* or technolog* or iphone* or smartphone* or mobile application* or mobile app* or teleconferenc* or messenger or whatsapp or skype or zoom or instant messag* or tablet* or e-mail* or asynchronous messag* or synchronous messag* or Videoconferenc* or hotline* or helpline* or call center*) adj3 (communicat* or engag* or discuss* or care or interact* or clinical guidance)) and patient*).tw,kf. |

|    |                                                                                                                                                                                                                                                                                                                                                                                                                                                                                                                                                                                                                                                                                                                                                                                                                                                                                                                                                                                                                                                                                                                                                                                                                                                                                                                                                              |
|----|--------------------------------------------------------------------------------------------------------------------------------------------------------------------------------------------------------------------------------------------------------------------------------------------------------------------------------------------------------------------------------------------------------------------------------------------------------------------------------------------------------------------------------------------------------------------------------------------------------------------------------------------------------------------------------------------------------------------------------------------------------------------------------------------------------------------------------------------------------------------------------------------------------------------------------------------------------------------------------------------------------------------------------------------------------------------------------------------------------------------------------------------------------------------------------------------------------------------------------------------------------------------------------------------------------------------------------------------------------------|
| 6  | ((remote or online or electronic* or video* or text message* or telephone* or phone* or email* or technolog* or virtual* or iphone* or smartphone* or mobile application* or mobile app* or teleconferenc* or messenger or whatsapp or skype or zoom or instant messag* or tablet* or e-mail* or asynchronous messag* or synchronous messag* or Videoconferenc* or hotline* or helpline* or call center*) adj3 (consult* or appointment* or meet or meeting* or visit*)) or virtual tool*).tw,kf.                                                                                                                                                                                                                                                                                                                                                                                                                                                                                                                                                                                                                                                                                                                                                                                                                                                            |
| 7  | ((virtual* or digital*) adj3 (healthcare or health care or health strategy)).tw,kw,kf. or (virtual care or virtual health).tw,kf. or (rapid* adj3 virtual*).tw,kf.                                                                                                                                                                                                                                                                                                                                                                                                                                                                                                                                                                                                                                                                                                                                                                                                                                                                                                                                                                                                                                                                                                                                                                                           |
| 8  | ((online or digital* or virtual*) adj3 (doctor* or physician* or clinic or clinics or nurse or nurses or nursing or medicine or medical)).tw,kf.                                                                                                                                                                                                                                                                                                                                                                                                                                                                                                                                                                                                                                                                                                                                                                                                                                                                                                                                                                                                                                                                                                                                                                                                             |
| 9  | (digital health or digital first).tw,kf.                                                                                                                                                                                                                                                                                                                                                                                                                                                                                                                                                                                                                                                                                                                                                                                                                                                                                                                                                                                                                                                                                                                                                                                                                                                                                                                     |
| 10 | ("e health*" or ehealth* or evisit* or "e-visit*").tw,kf.                                                                                                                                                                                                                                                                                                                                                                                                                                                                                                                                                                                                                                                                                                                                                                                                                                                                                                                                                                                                                                                                                                                                                                                                                                                                                                    |
| 11 | (online adj3 (healthcare or health care)).tw,kf.                                                                                                                                                                                                                                                                                                                                                                                                                                                                                                                                                                                                                                                                                                                                                                                                                                                                                                                                                                                                                                                                                                                                                                                                                                                                                                             |
| 12 | ((virtual* or digital*) adj3 (healthcare or health care or health strategy)).tw,kf.                                                                                                                                                                                                                                                                                                                                                                                                                                                                                                                                                                                                                                                                                                                                                                                                                                                                                                                                                                                                                                                                                                                                                                                                                                                                          |
| 13 | (teleassist* or "tele-assist*" or teleaudiolog* or "tele-audiolog*" or telebased or "tele-based" or telecancer or "tele-cancer" or "tele-cardiolo*" or telecardiolog* or teleconsult* or "tele-consult*" or telecounselling or "tele-counselling" or telecounseling or "tele-counseling" or teledental or "tele-dental" or telederm* or "tele-derm*" or telediagnos* or "tele-diagnos*" or teledialysis or "tele-dialysis" or teleecho* or "tele-echo*" or teleemerg* or "tele-emerg*" or teleepileps* or "tele-epileps*" or telefollow* or "tele-follow*" or teleguidance or "tele-guidance" or "tele-health*" or telehome* or "tele-home*" or teleICU or "tele-ICU" or teleintervention* or "tele-intervention*" or telemanag* or "tele-manag*" or telemedicine or "tele-medicine" or telemental* or "tele-mental*" or telemonitor* or "tele-monitor*" or telenurs* or "tele-nurs*" or teleoncolo* or "tele-oncolo*" or teleophthalm* or "tele-ophthalm*" or telepalliat* or "tele-palliat*" or "tele-patholog*" or teleprocedu* or "tele-procedu*" or telepsych* or "tele-psych*" or teleradiol* or "tele-radiol*" or telerefer* or "tele-refer*" or telerehab* or "tele-rehab*" or telesurger* or "tele-surger*" or telesurgic* or "tele-surgic*" or teletherap* or "tele-therap*" or teletreat* or "tele-treat*" or teletriage or "tele-triage").tw,kf. |
| 14 | (tele adj (care or counselling or counseling or diagnos* or health* or intervention* or manag* or therap* or treat* or medicine or medical or nursing)).tw,kf.                                                                                                                                                                                                                                                                                                                                                                                                                                                                                                                                                                                                                                                                                                                                                                                                                                                                                                                                                                                                                                                                                                                                                                                               |
| 15 | ("e-care" or ecare or "e-consult*" or econsult* or "e-diagnos*" or ediagnosis* or "e-medicine" or emedicine or "e-nurse*" or enurse* or "e-nursing" or enursing or "e-physician*" or ephysician* or "e-psych*" or epsych* or "e-therapy" or etherapy or mhEALTH or "M-HEALTH").tw,kf.                                                                                                                                                                                                                                                                                                                                                                                                                                                                                                                                                                                                                                                                                                                                                                                                                                                                                                                                                                                                                                                                        |
| 16 | ((online or video* or text message* or telephone* or phon* or email* or virtual* or technolog* or iphone* or smartphone* or mobile application* or mobile app* or teleconferenc* or messenger or instant messag* or whatsapp or skype or zoom or tablet* or e-mail* or asynchronous messag* or synchronous messag* or Videoconferenc* or hotline* or helpline* or call center*) adj2 (care or                                                                                                                                                                                                                                                                                                                                                                                                                                                                                                                                                                                                                                                                                                                                                                                                                                                                                                                                                                |

|    |                                                                                                                                                                                                                                                                 |
|----|-----------------------------------------------------------------------------------------------------------------------------------------------------------------------------------------------------------------------------------------------------------------|
|    | counselling or Counseling or diagnos* or health* or intervention* or manag* or therap* or treat* or medicine or medical or nursing)).tw,kf.                                                                                                                     |
| 17 | (virtual* adj3 monitor*).tw,kf.                                                                                                                                                                                                                                 |
| 18 | ((implant* sensor* or body sensor*) adj4 (diagnost* or monitor* or report*)).tw,kf.                                                                                                                                                                             |
| 19 | mobile health monitor*.tw,kf.                                                                                                                                                                                                                                   |
| 20 | 1 or 2 or 3 or 4 or 5 or 6 or 7 or 8 or 9 or 10 or 11 or 12 or 13 or 14 or 15 or 16 or 17 or 18 or 19                                                                                                                                                           |
| 21 | "Outcome and Process Assessment, Health Care"/                                                                                                                                                                                                                  |
| 22 | Quality Assurance, Health Care/                                                                                                                                                                                                                                 |
| 23 | Benchmarking/                                                                                                                                                                                                                                                   |
| 24 | Total Quality Management/                                                                                                                                                                                                                                       |
| 25 | Quality Improvement/                                                                                                                                                                                                                                            |
| 26 | Quality Indicators, Health Care/                                                                                                                                                                                                                                |
| 27 | "Utilization Review"/                                                                                                                                                                                                                                           |
| 28 | Patient Outcome Assessment/                                                                                                                                                                                                                                     |
| 29 | (quality indicat* or quality metric or quality standard* or quality measure* or quality report* or performance measure* or metric or performance metric or usability or care evaluation or benchmark* or scorecard or balanced scorecard or logic model).tw,kf. |
| 30 | (quality adj3 (indicat* or metric* or standard* or measure*)).tw,kf.                                                                                                                                                                                            |
| 31 | 21 or 22 or 23 or 24 or 25 or 26 or 27 or 28 or 29 or 30 or 31                                                                                                                                                                                                  |
| 32 | 20 and 32                                                                                                                                                                                                                                                       |
| 33 | limit 33 to (english language and yr="2015 -Current")                                                                                                                                                                                                           |

**Table 2 - Grey Literature Sources**

| Targeted Website Searches                                                                               |                                                                                           |
|---------------------------------------------------------------------------------------------------------|-------------------------------------------------------------------------------------------|
| Organization name & website URL                                                                         | Search strategy(s)/ terms searched                                                        |
| McMaster Health Forum<br><a href="http://www.healthsystemevidence.org">www.healthsystemevidence.org</a> | 1. (virtual care OR digital health) AND quality<br>2. Telemedicine AND quality indicators |
| Publications Canada<br><a href="https://publications.gc.ca">https://publications.gc.ca</a>              | 1. Virtual care<br>2. Telemedicine                                                        |

|                                                                                                                                                                                                                                                                      |                                                                                                                                                   |
|----------------------------------------------------------------------------------------------------------------------------------------------------------------------------------------------------------------------------------------------------------------------|---------------------------------------------------------------------------------------------------------------------------------------------------|
|                                                                                                                                                                                                                                                                      | 3. eHealth                                                                                                                                        |
| Health Quality Ontario<br><a href="http://www.hqontario.ca/Evidence-to-Improve-Care/Health-Technology-Assessment">http://www.hqontario.ca/Evidence-to-Improve-Care/Health-Technology-Assessment</a>                                                                  | 1. Virtual care<br>2. Telemedicine<br>3. Telehealth                                                                                               |
| NICE<br><a href="http://www.nice.org.uk">www.nice.org.uk</a>                                                                                                                                                                                                         | 1. Virtual care<br>2. Telemedicine<br>3. Telehealth<br>4. Digital care                                                                            |
| AHRQ - EPC<br><a href="http://www.ahrq.gov/research/findings/evidence-based-reports/search.html">http://www.ahrq.gov/research/findings/evidence-based-reports/search.html</a>                                                                                        | 1. Virtual care<br>2. Telemedicine<br>3. Telehealth                                                                                               |
| AHRQ – EHC<br><a href="https://effectivehealthcare.ahrq.gov/products-tools/">https://effectivehealthcare.ahrq.gov/products-tools/</a>                                                                                                                                | 1. Virtual care<br>2. Telemedicine<br>3. Telehealth                                                                                               |
| Canadian Medical Association<br><a href="http://www.cma.ca">www.cma.ca</a>                                                                                                                                                                                           | 1. Virtual care<br>2. Telemedicine<br>3. Telehealth                                                                                               |
| Institute for Healthcare Improvement – White Papers<br><a href="http://www.ihl.org">www.ihl.org</a>                                                                                                                                                                  | N/A – no search function, reviewed ‘Publications’ and ‘White Papers’ section of site                                                              |
| Health Quality Council of Alberta<br><a href="http://hqca.ca/studies-and-reviews/completed-reviews/">http://hqca.ca/studies-and-reviews/completed-reviews/</a>                                                                                                       | 1. Virtual care<br>2. Telemedicine<br>3. Telehealth                                                                                               |
| INATHA Secretariat<br><a href="http://www.inahta.org/publications">http://www.inahta.org/publications</a>                                                                                                                                                            | 1. Virtual care<br>2. Telemedicine<br>3. Telehealth                                                                                               |
| WHO Health Evidence Network<br><a href="http://www.euro.who.int/en/what-we-do/data-and-evidence/health-evidence-network-hen/publications/by-keyword">http://www.euro.who.int/en/what-we-do/data-and-evidence/health-evidence-network-hen/publications/by-keyword</a> | 1. Virtual care<br>2. Telemedicine<br>3. Telehealth                                                                                               |
| <b>Targeted Database Searches</b>                                                                                                                                                                                                                                    |                                                                                                                                                   |
| <i>Database name &amp; URL</i>                                                                                                                                                                                                                                       | <i>Search strategy(s)/ terms searched</i>                                                                                                         |
| Google Scholar<br>scholar.google.com                                                                                                                                                                                                                                 | 1. “virtual care” AND quality indicators<br>2. Telemedicine AND quality indicators<br>3. eHealth AND quality indicators                           |
| MedRXiv<br><a href="http://www.medrxiv.org">www.medrxiv.org</a>                                                                                                                                                                                                      | 1. Virtual care quality indicator<br>2. Telemedicine quality indicator<br>Results screened by 1 reviewer, 23 items selected for further screening |
| OpenGrey<br><a href="http://www.opengrey.eu/">http://www.opengrey.eu/</a>                                                                                                                                                                                            | 1. Virtual care<br>Telemedicine                                                                                                                   |
| <b>Targeted Journal Search</b>                                                                                                                                                                                                                                       |                                                                                                                                                   |
| <i>Journal Name</i>                                                                                                                                                                                                                                                  | <i>Search strategy(s)/ terms searched</i>                                                                                                         |

|                                      |                                                                                |
|--------------------------------------|--------------------------------------------------------------------------------|
| Journal of Medical Internet Research | Hand-searched (reviewed table of contents) of all editions in previous 2 years |
| Lancet Digital Health                | Hand-searched (reviewed table of contents) of all editions in previous 2 years |
| Nature Digital Medicine              | Hand-searched (reviewed table of contents) of all editions in previous 2 years |

**Table 3: Frequency of NAM quality domain sub-codes.**

| <i>NAM Quality Domain</i>                                         | <b>Patient Experience<br/>(n=200)</b> | <b>Provider Experience<br/>(n=52)</b> |
|-------------------------------------------------------------------|---------------------------------------|---------------------------------------|
| <i>Effective (n=64)<br/>[n (%)]</i>                               | 52 (81)                               | 12 (19)                               |
| <i>Equitable (n=25)<br/>[n (%)]</i>                               | 24 (96)                               | 1 (4)                                 |
| <i>Efficient (n=36)<br/>[n (%)]</i>                               | 30 (83)                               | 6 (17)                                |
| <i>Patient-centered (n=66)<br/>[n (%)]</i>                        | 60 (91)                               | 6 (9)                                 |
| <i>Safe (n=10)<br/>[n (%)]</i>                                    | 8 (80)                                | 2 (20)                                |
| <i>Timely (n=9)<br/>[n (%)]</i>                                   | 7 (78)                                | 2 (22)                                |
| <i>Sustainable (n=36)<br/>[n (%)]</i>                             | 16 (44)                               | 20 (56)                               |
| <i>Composite (n=6)<br/>[n (%)]</i>                                | 3 (50)                                | 3 (50)                                |
| *Indicators that address more than one of the NAM quality domains |                                       |                                       |

# BMJ Open

## Quality measures of virtual care in ambulatory healthcare environments: A scoping review

|                                 |                                                                                                                                                                                                                                                                                                                                                                                                                                                                                                                                                                                                                                                                                                                                                                                                                                                                                                                                                                                                                                                                                                                                                                                                                                                          |
|---------------------------------|----------------------------------------------------------------------------------------------------------------------------------------------------------------------------------------------------------------------------------------------------------------------------------------------------------------------------------------------------------------------------------------------------------------------------------------------------------------------------------------------------------------------------------------------------------------------------------------------------------------------------------------------------------------------------------------------------------------------------------------------------------------------------------------------------------------------------------------------------------------------------------------------------------------------------------------------------------------------------------------------------------------------------------------------------------------------------------------------------------------------------------------------------------------------------------------------------------------------------------------------------------|
| Journal:                        | <i>BMJ Open</i>                                                                                                                                                                                                                                                                                                                                                                                                                                                                                                                                                                                                                                                                                                                                                                                                                                                                                                                                                                                                                                                                                                                                                                                                                                          |
| Manuscript ID                   | bmjopen-2023-078214.R1                                                                                                                                                                                                                                                                                                                                                                                                                                                                                                                                                                                                                                                                                                                                                                                                                                                                                                                                                                                                                                                                                                                                                                                                                                   |
| Article Type:                   | Original research                                                                                                                                                                                                                                                                                                                                                                                                                                                                                                                                                                                                                                                                                                                                                                                                                                                                                                                                                                                                                                                                                                                                                                                                                                        |
| Date Submitted by the Author:   | 03-Nov-2023                                                                                                                                                                                                                                                                                                                                                                                                                                                                                                                                                                                                                                                                                                                                                                                                                                                                                                                                                                                                                                                                                                                                                                                                                                              |
| Complete List of Authors:       | <p>Petrie, Samuel; University Health Network, Ted Rogers Centre for Heart Research; University of Toronto, Institute of Health Policy, Management and Evaluation</p> <p>Laur, Celia ; Women's College Hospital, Women's College Institute for Health Systems Solutions and Virtual Care; University of Toronto, Institute of Health Policy, Management and Evaluation</p> <p>Rios, Patricia; Women's College Hospital, Women's College Institute for Health Systems Solutions and Virtual Care</p> <p>Suarez, Ally; Women's College Hospital, Women's College Institute for Health Systems Solutions and Virtual Care</p> <p>Makanjuola, Oluwatoni; Women's College Hospital, Women's College Institute for Health Systems Solutions and Virtual Care</p> <p>Burke, Emeraldalda; Women's College Hospital, Women's College Institute for Health Systems Solutions and Virtual Care</p> <p>Bhattacharyya, Onil; University of Toronto, Family and Community Medicine; Women's College Hospital, Women's College Institute for Health Systems Solutions and Virtual Care</p> <p>Mukerji, Geetha; Women's College Hospital, Women's College Institute for Health Systems Solutions and Virtual Care; University of Toronto, Temerty Faculty of Medicine</p> |
| <b>Primary Subject Heading</b>: | Health services research                                                                                                                                                                                                                                                                                                                                                                                                                                                                                                                                                                                                                                                                                                                                                                                                                                                                                                                                                                                                                                                                                                                                                                                                                                 |
| Secondary Subject Heading:      | Evidence based practice                                                                                                                                                                                                                                                                                                                                                                                                                                                                                                                                                                                                                                                                                                                                                                                                                                                                                                                                                                                                                                                                                                                                                                                                                                  |
| Keywords:                       | Quality in health care < HEALTH SERVICES ADMINISTRATION & MANAGEMENT, Telemedicine < BIOTECHNOLOGY & BIOINFORMATICS, Patient-Centered Care, Health Equity                                                                                                                                                                                                                                                                                                                                                                                                                                                                                                                                                                                                                                                                                                                                                                                                                                                                                                                                                                                                                                                                                                |
|                                 |                                                                                                                                                                                                                                                                                                                                                                                                                                                                                                                                                                                                                                                                                                                                                                                                                                                                                                                                                                                                                                                                                                                                                                                                                                                          |

SCHOLARONE™  
Manuscripts

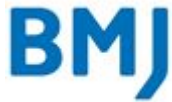

I, the Submitting Author has the right to grant and does grant on behalf of all authors of the Work (as defined in the below author licence), an exclusive licence and/or a non-exclusive licence for contributions from authors who are: i) UK Crown employees; ii) where BMJ has agreed a CC-BY licence shall apply, and/or iii) in accordance with the terms applicable for US Federal Government officers or employees acting as part of their official duties; on a worldwide, perpetual, irrevocable, royalty-free basis to BMJ Publishing Group Ltd ("BMJ") its licensees and where the relevant Journal is co-owned by BMJ to the co-owners of the Journal, to publish the Work in this journal and any other BMJ products and to exploit all rights, as set out in our [licence](#).

The Submitting Author accepts and understands that any supply made under these terms is made by BMJ to the Submitting Author unless you are acting as an employee on behalf of your employer or a postgraduate student of an affiliated institution which is paying any applicable article publishing charge ("APC") for Open Access articles. Where the Submitting Author wishes to make the Work available on an Open Access basis (and intends to pay the relevant APC), the terms of reuse of such Open Access shall be governed by a Creative Commons licence – details of these licences and which [Creative Commons](#) licence will apply to this Work are set out in our licence referred to above.

Other than as permitted in any relevant BMJ Author's Self Archiving Policies, I confirm this Work has not been accepted for publication elsewhere, is not being considered for publication elsewhere and does not duplicate material already published. I confirm all authors consent to publication of this Work and authorise the granting of this licence.



1  
2  
3 1 Quality measures of virtual care in ambulatory healthcare environments: A scoping  
4 review  
5 2  
6 3

8 4 Samuel Petrie (ORCID: 0000-0001-6809-6027)<sup>1,3†</sup>, Celia V Laur (ORCID: 0000-0003-  
9 4555-1407)<sup>2,3†</sup>, Patricia Rios (ORCID: 0000-0003-2599-282X)<sup>2</sup>, Ally Suarez<sup>2</sup>, Oluwatoni  
10 5 Makanjuola<sup>2</sup>, Emeralda Burke<sup>2</sup>, Onil Bhattacharyya (ORCID: 0000-0001-5219-7288)<sup>2,3,4</sup>,  
11 6 Geetha Mukerji (ORCID:0000-0002-6477-9848)<sup>2,3,5\*</sup>  
12 7  
13 8

15 9  
16 10  
17 11  
18 12  
19 13  
20 14  
21 15  
22 16  
23 17  
24 18  
25 19  
26 20  
27 21  
28 22  
29 23  
30 24  
31 25  
32 26  
33 27  
34 28  
35 29  
36 30  
37 31  
38 32  
39 33  
40 34  
41 35  
42 36  
43 37  
44 38  
45 39  
46 40  
47 41  
48 42  
49 43  
50 44  
51 45  
52 46  
53 47  
54 48  
55 49  
56 50  
57 51  
58 52  
59 53  
60 54

1 Ted Rogers Centre for Heart Research, University Health Network, Toronto, ON,  
Canada

2 Women's College Institute for Health Systems Solutions and Virtual Care, Women's  
College Hospital, Toronto, ON, Canada

3 Institute of Health Policy, Management and Evaluation, University of Toronto, Toronto,  
ON, Canada

4 Department of Family & Community Medicine, Temerty Faculty of Medicine, University  
of Toronto, Toronto, ON, Canada

5 Department of Medicine, Temerty Faculty of Medicine, University of Toronto, Toronto,  
ON, Canada

\*Corresponding Author: Geetha Mukerji, Women's College Hospital Institute for Health  
System Solutions & Virtual Care, Rm 3414, 76 Grenville Street, Toronto, Ontario M5S  
1B3; e-mail: [geetha.mukerji@wchospital.ca](mailto:geetha.mukerji@wchospital.ca)

†These authors contributed equally to this work

**Keywords:** Quality Improvement; Quality Indicators, Health Care; Delivery of Health  
Care; Virtual Medicine

**ABSTRACT**

**Objectives:** Delivery of virtual care increased throughout the COVID-19 pandemic and persisted after physical distancing measures ended. However, little is known about how to measure the quality of virtual care, as current measures focus on in-person care and may not apply to a virtual context. This scoping review aims to understand the connections between virtual care modalities used with ambulatory patient populations and quality measures across the Quintuple Aim ( provider experience, patient experience, per capita cost, population health, and health equity).

**Design:** Virtual care was considered any interaction between patients and/or their circle of care occurring remotely using any form of information technology. Five databases (Medline, Embase, PsycInfo, Cochrane Library, JBI) and grey literature sources (11 websites, 3 search engines) were searched from 2015-June 2021 and again in August 2022 for publications that analysed virtual care in ambulatory settings. Indicators were extracted, double coded into the Quintuple Aim framework; patient and provider experience indicators were further categorized based on the National Academy of Medicine quality framework (safety, effectiveness, patient-centeredness, timeliness, efficiency, and equity). Sustainability was added to capture potential for continued use of virtual care.

**Results:** 13,504 citations were double screened resulting in 631 full-text articles, 66 of which were included. Common modalities included video or audio visits (n=43), remote monitoring (n=11), and mobile applications (n=11). The most common quality indicators were related to patient experience (n=58 articles), followed by provider experience (n=25), population health outcomes (n=23), and health system costs (n=19).

1  
2  
3 55 **Conclusions:** The connections between virtual care modalities and quality domains  
4  
5 56 identified here can inform clinicians, administrators, and other decision makers how to  
6  
7 57 monitor quality of virtual care and provides insights into gaps in current quality  
8  
9 58 measures. Next steps include development of a balanced scorecard of virtual care  
10  
11 59 quality indicators for ambulatory settings to inform quality improvement.  
12  
13  
14  
15  
16

### 17 61 **Strengths and limitations of this study**

- 19 62 • The methodology was broad in scope, seeking to collate a comprehensive list of  
20  
21 63 quality indicators of virtual care that included both published and grey literature  
22  
23  
24 64 • Used established scoping review methods for literature search, study selection, data  
25  
26 65 collection, coding, and reporting  
27  
28  
29 66 • Quality indicators were mapped and categorized into established quality frameworks  
30  
31 67 including the Quintuple Aim and the National Academy of Medicine quality domains  
32  
33 68 • Literature search was limited to articles published after 2015 and available in English  
34  
35 69 language only  
36  
37  
38 70 • Categorization of indicators was complicated by the lack of reported detail  
39  
40

41 71  
42  
43  
44  
45  
46  
47  
48  
49  
50  
51  
52  
53  
54  
55  
56  
57  
58  
59  
60

## 72 INTRODUCTION

73 Virtual care is defined as any interaction between patients and/or caregivers and their  
74 healthcare providers (or “circle of care”) that occurs remotely and is facilitated through  
75 digital communication or other information technologies (1). Prior to the COVID-19  
76 pandemic, virtual care was largely underutilized for delivering healthcare services in  
77 Canada (2). The COVID-19 pandemic changed the global healthcare landscape and  
78 accelerated the implementation and access to virtual care for many patients (2).  
79 Although utilization of virtual care decreased after pandemic restrictions eased, the  
80 demands for the option to virtual care persist with many patients and/or caregivers  
81 appreciating the convenience that virtual care affords(3,4). Healthcare providers also  
82 see the value of virtual care in specific situations due to its’ potential to improve patient  
83 access to care especially for those with mobility issues or living in rural/remote areas,  
84 and for maintaining connections with patients in between in-person visits (5). The future  
85 of healthcare delivery will require the integration of both virtual and in-person modalities  
86 across the continuum of care (6). To meet these needs, virtual care needs to be  
87 accessible and high quality; however, there is little understanding of what constitutes a  
88 ‘quality’ encounter through virtual care for both patients and providers. Continued use  
89 and integration of virtual care into standard practice, in part, depends on its impact on  
90 the quality of care and the experiences of patients, caregivers, and healthcare  
91 providers.

92  
93 Quality indicators are standardized, evidence-based measures that can be used to track  
94 and compare health outcomes and performance over time and across different

1  
2  
3 95 organizations (7,8). Measurement of these indicators can identify gaps in care delivery  
4  
5 96 and inform quality improvement (QI) efforts within an organization, across health  
6  
7 97 systems, and across geographical boundaries. However, traditional indicators to assess  
8  
9 98 quality in healthcare primarily focus on in-person care and may have limited applicability  
10  
11 99 to care delivered virtually. While some literature on virtual care indicators have been  
12  
13 100 published, most studies focus solely within a specific clinical area (e.g., obstetrics,  
14  
15 101 cardiology, etc.) or few domains of interest (e.g., acceptability, satisfaction etc.), limiting  
16  
17 102 the scope and applicability for healthcare organizations to evaluate what constitutes  
18  
19 103 “quality” in virtual care (9–11).  
20  
21  
22  
23  
24  
25

26 105 This scoping review was conducted with the aim to characterize existing quality  
27  
28 106 indicators used to evaluate modalities of virtual care and categorize the indicators  
29  
30 107 across the Quintuple Aim framework and National Academy of Medicine (NAM) quality  
31  
32 108 framework (safety, effectiveness, patient-centeredness, timeliness, efficiency, and  
33  
34 109 equity). Sustainability was added to capture potential for continued use of virtual care.  
35  
36 110 Our review focused on ambulatory patients as virtual care has a considerable role for  
37  
38 111 access to care; hospitalized in-patients have unique characteristics with higher acuity  
39  
40 112 rendering higher need for in-person care and therefore not included in this review.  
41  
42  
43 113 This work will provide the foundation for identification and categorization of quality  
44  
45 114 indicators that can inform clinicians, healthcare managers, and other decision makers  
46  
47 115 how best to monitor quality of virtual care, identify performance gaps, and target areas  
48  
49 116 for future improvement efforts.  
50  
51  
52  
53  
54  
55  
56  
57  
58  
59  
60

## 118 **METHODS**

119 The scoping review methodology used in the study was guided by the Joanna Briggs  
120 Institute (JBI) Manual for Evidence Synthesis (12). Reporting of methods and results  
121 was developed in accordance with the PRISMA extension statement for scoping  
122 reviews (Supplementary File 1) (13).

### 124 **Information sources and literature search**

125 A comprehensive literature search was developed in consultation with an academic  
126 librarian that included published academic and grey literature sources, as well as hand  
127 searches of relevant journals. Initial literature searches were conducted in June 2021  
128 and were updated in August 2022. Databases searched included MEDLINE, Embase,  
129 PsycInfo, The Cochrane Library, and the JBI Evidence-based practice database  
130 (Supplementary File 2). Keyword searches were also carried out in selected websites,  
131 Google Scholar, Medrxiv, and Open Grey to identify grey literature including policy  
132 documents, organizational strategies, and unpublished academic literature  
133 (Supplementary File 2). Specialty journals focused on virtual/digital care including  
134 Journal of Medical Internet Research, Lancet Digital Health, and Nature Digital  
135 Medicine, were hand searched from 2015 to June 2022.

### 137 **Eligibility criteria**

138 The eligibility criteria were structured based on the “Population, Context, Concept”  
139 (PCC) research framework(12) as follows:

- 1  
2  
3 140 • *Population*: adults (over 18 years of age) receiving ambulatory/outpatient care  
4  
5  
6 141 through healthcare organizations for chronic or acute/subacute conditions.  
7  
8 142 • *Context*: participation in virtual care, defined as “any interaction between patients  
9  
10 143 and/or members of their circle of care, occurring remotely, using any forms of  
11  
12 144 communication or information technologies”(1)  
13  
14  
15 145 • *Concept*: within the Quintuple Aim framework (provider experience, patient  
16  
17 146 experience, per capita cost, population health, and health equity)(14), indicators are  
18  
19 147 based in the NAM’s quality framework (safety, effectiveness, patient-centeredness,  
20  
21 148 timeliness, efficiency and equity) and sustainability(15).

22  
23  
24 149 All modalities of virtual care were included such as video conferencing, remote  
25  
26 150 monitoring, and patient portals. Included papers must have addressed multiple domains  
27  
28 151 within the Quintuple Aim, or a domain with the Quintuple Aim and NAM quality  
29  
30 152 framework. Studies that focused on only one domain in a specific population were  
31  
32 153 excluded. Disease specific publications were only included if they focused on two or  
33  
34 154 more quality domains. Due to changes in technology and the rapid increase in virtual  
35  
36 155 care only studies published in English from 2015-2022 were included.  
37  
38  
39

40 156

### 41 42 157 **Study selection process**

43  
44  
45 158 The literature search results were uploaded into Covidence review manager and de-  
46  
47 159 duplicated prior to screening(16). Screening questions based on the eligibility criteria  
48  
49 160 (Supplementary File 3) were developed for both title/abstract and full-text screening and  
50  
51 161 pilot tested with rounds of randomly selected citations until satisfactory agreement  
52  
53 162 (>75%) was reached between reviewers. Double screening of title/abstracts was  
54  
55  
56  
57  
58  
59  
60

1  
2  
3 163 conducted (by CL, PR, VK, and AS), followed by full text screening by a single reviewer  
4  
5 164 for a streamlined approach. Conflicts were resolved through group discussion with the  
6  
7  
8 165 reviewers and confirmed by (GM). After full text screening, all excluded citations or  
9  
10 166 articles were re-reviewed by an independent second reviewer (PR) to ensure accuracy.  
11  
12 167 A similar process was followed for the 2022 update with SP, PR and AS, as reviewers.  
13  
14  
15 168

### 17 169 **Data collection and management**

18  
19 170 Due to the large heterogeneity across the types of papers, and the lack of  
20  
21 171 standardization in reporting of quality indicators and domains, the team opted for a  
22  
23 172 rigorous approach with two reviewers (two of CL, PR, VK, SP, and AS) independently  
24  
25 173 extracting each article. Any discrepancies in extracted data were reviewed and resolved  
26  
27 174 by an independent third reviewer. A standardized data extraction form was developed to  
28  
29 175 summarize and record the reviewed studies within Covidence review manager.  
30  
31

32  
33 176 Extraction was piloted in two rounds using 3 studies per round, and the extraction form  
34  
35 177 revised accordingly. Data items included publication characteristics (year of publication,  
36  
37 178 country, study design, funding source, and sample size), intervention details (care  
38  
39 179 setting, virtual care modality, primary condition/health concern), and details on reported  
40  
41 180 quality indicators (definition, measurement/scoring tools, etc.).  
42  
43  
44  
45 181

### 46 47 182 **Data Synthesis**

48  
49 183 Individual indicators were used to demonstrate the connections between virtual care  
50  
51 184 modalities and the Quintuple Aim (14); patient experience and provider experience were  
52  
53 185 further sub-coded into the NAM quality domains (15) along with sustainability. These  
54  
55  
56  
57  
58  
59



1  
2  
3 186 connections were visualized through an alluvial (also known as Sankey) diagram.  
4  
5 187 Although these individual indicators will be further refined through a future Delphi  
6  
7 188 consensus process to narrow a subset of indicators across quality domains, the  
8  
9 189 proportions provide valuable information regarding the types of quality domains and  
10  
11 190 their corresponding modalities.  
12  
13  
14  
15 191

### 16 191 17 192 **Risk of bias**

18  
19 193 As this was a scoping review intended to capture a collection of quality indicator items,  
20  
21 194 rather than evaluate their effectiveness or appropriateness, risk of bias was not  
22  
23 195 assessed based on current published guidelines (12).  
24  
25  
26 196

### 27 28 197 **Patient and Public Involvement Statement**

29  
30 198 People with lived experience were involved in the conception and development of the  
31  
32 199 scoping review as well as the presentation and dissemination of results through the  
33  
34 200 Patient Experience Advisors program and the Community Liaison Advisory Council  
35  
36 201 (CLAC) at Women's College Hospital. We intend to solicit further patient participation as  
37  
38 202 well as general public involvement in future work developing a balanced scorecard  
39  
40 203 based on the literature identified in this review. Working with patients helped to ensure  
41  
42 204 quality indicators that were extracting from the literature were relevant to patient  
43  
44 205 concerns and provided guidance on the mapping of indicators to the Quintuple Aim and  
45  
46 206 NAM quality framework. Patient advisors also helped to identify gaps, including the lack  
47  
48 207 of focus on equity, and will further input to addressing these gaps through development  
49  
50 208 of the scorecard.  
51  
52  
53  
54  
55  
56  
57  
58  
59  
60

209

## 210 RESULTS

211 The literature search resulted in a total of 18,395 citations from databases and grey  
212 literature searching that were imported into Covidence; no additional citations were  
213 identified through hand-searching journals. A total of 4,891 duplicate citations were  
214 removed leaving 13,504 citations for title and abstract screening. After title and abstract  
215 screening, 814 full-text articles were identified for retrieval and 183 reports, mostly  
216 conference abstracts and commentaries, were further excluded. After assessing the  
217 reports for eligibility, 66 articles were included for data extraction (Fig 1).

218

### 219 Figure 1: PRISMA study flow diagram

220

### 221 Characteristics of Included Studies

222 The included studies comprised 45 primary research studies (e.g., observational  
223 studies) and 21 secondary research articles (e.g., systematic reviews). Table 1  
224 summarizes the main characteristics of the included articles. The most frequent study  
225 designs were observational studies (n=32), followed by systematic reviews (n=11),  
226 qualitative studies (n=5), and interventional trials (n=5). The majority of included studies  
227 were published between 2018 and 2020 (n=25) in North America (n=29) or Europe  
228 (n=22). Funding sources were mainly from public institutions (n=30), but a large  
229 proportion of studies also reported no external funding for their study (n=24).

230

### 231 Table 1: Characteristics of included studies (n=66)

|                                             | <b>Primary Studies<br/>(n=45)<br/>[n (%)]</b> | <b>Secondary<br/>Studies (n=21)<br/>[n (%)]</b> |
|---------------------------------------------|-----------------------------------------------|-------------------------------------------------|
| <b>Year of Publication</b>                  |                                               |                                                 |
| 2015-2017                                   | 13 (29)                                       | 7 (33)                                          |
| 2018-2020                                   | 18 (40)                                       | 7 (33)                                          |
| 2021-2022                                   | 14 (31)                                       | 7 (33)                                          |
| <b>Country of Publication</b>               |                                               |                                                 |
| Asia                                        | 1 (2)                                         | 3 (14)                                          |
| Australia/South Pacific                     | 4 (9)                                         | 2 (10)                                          |
| Europe                                      | 14 (31)                                       | 7 (33)                                          |
| North Africa and Middle East                | 4 (9)                                         | 1 (5)                                           |
| North America                               | 21 (47)                                       | 8 (38)                                          |
| South America                               | 1 (2)                                         | --                                              |
| <b>Study Design</b>                         |                                               |                                                 |
| Case report/series                          | 1 (2)                                         | --                                              |
| Observational (cross-sectional, cohort)     | 30 (67)                                       | --                                              |
| Qualitative study                           | 5 (11)                                        | --                                              |
| Mixed methods                               | 3 (7)                                         | --                                              |
| Interventional (pre/post, controlled trial) | 5 (11)                                        | --                                              |
| Cost/Cost-Effectiveness                     | 1 (2)                                         | --                                              |
| Systematic Review                           | --                                            | 11 (53)                                         |
| Scoping/Umbrella Review                     | --                                            | 4 (19)                                          |
| Integrative Review                          | --                                            | 3 (14)                                          |
| Environmental Scan                          | --                                            | 3 (14)                                          |
| <b>Funding Source</b>                       |                                               |                                                 |
| Private                                     | 1 (2)                                         | 2 (10)                                          |
| Public                                      | 22 (49)                                       | 8 (38)                                          |
| Mixed                                       | 2 (5)                                         | --                                              |
| None                                        | 14 (31)                                       | 9 (42)                                          |
| Not Reported                                | 6 (13)                                        | 2 (10)                                          |
| <b>Number of participants</b>               |                                               |                                                 |
| Patients/Caregivers [median (IQR)]          | 115 (42-265)                                  | --                                              |
| Healthcare Providers [median (IQR)]         | 18 (13, 22)                                   | --                                              |
| <b>Participant Age</b>                      |                                               |                                                 |

|                                                 |                            |             |
|-------------------------------------------------|----------------------------|-------------|
| Patients/Caregivers [median (IQR)]              | 55.5 (47, 63)              | --          |
| Healthcare Providers [range]                    | 22-76                      | --          |
| <b>Participant Gender (%)</b>                   |                            |             |
| Patients/Caregivers [median]                    | Female: 53.7<br>Male: 50   | --          |
| Healthcare Providers [median]                   | Female: 61.3<br>Male: 38.7 | --          |
| <b>Review Methods</b>                           |                            |             |
| Number of included publications [median (IQR)]  | --                         | 17 (12, 22) |
| Reported inclusion/exclusion criteria           | --                         | 16 (76)     |
| Limited search by language                      | --                         | 10 (48)     |
| Limited search by date                          | --                         | 5 (24)      |
| <b>Age/publication date of included studies</b> |                            |             |
| 0-5 years prior                                 | --                         | 3 (14)      |
| 6-10 years prior                                | --                         | 4 (19)      |
| 11+ years prior                                 | --                         | 9 (43)      |
| Not reported                                    | --                         | 5 (24)      |

Interventions examined in the included studies covered a range of virtual care modalities (Table 2) including video and audio visits with clinicians (n=44), remote monitoring programs (n=13), mobile applications (n=12), self-monitoring and wearable devices (n=9), synchronous or asynchronous messaging with healthcare providers (n=13), or patient portals (n=10). Care settings (Table 2) ranged from ambulatory and outpatient clinics (n=41) to primary care (n=13), and home and community care settings (n=8). Patient populations (Table 2) included individuals with chronic noncommunicable conditions (n=19), cancer (n=7), and mental health conditions (n=5).

241

**Table 2: Summary of intervention and setting characteristics (n=66)**

|  | Value |
|--|-------|
|--|-------|

|                                                                                        | [n (%)] |
|----------------------------------------------------------------------------------------|---------|
| <b>Primary Condition/Health Concern</b>                                                |         |
| Cancer                                                                                 | 7 (11)  |
| Cardiac conditions                                                                     | 3 (5)   |
| Chronic pain/Musculoskeletal                                                           | 3 (5)   |
| Dermatologic conditions                                                                | 4 (6)   |
| Diabetes                                                                               | 5 (8)   |
| Kidney disease                                                                         | 3 (5)   |
| Mental Health                                                                          | 5 (8)   |
| Palliative                                                                             | 3 (5)   |
| Specialist Clinic*                                                                     | 8 (12)  |
| Surgery - unspecified                                                                  | 3 (5)   |
| Multiple conditions                                                                    | 11 (17) |
| Not applicable/unspecified                                                             | 11 (17) |
| <b>Setting/Context of care delivery</b>                                                |         |
| Ambulatory care/outpatient clinic                                                      | 40 (60) |
| Primary care                                                                           | 13 (20) |
| Home and Community care                                                                | 7 (11)  |
| Not applicable/not specified                                                           | 6 (9)   |
| <b>Type of Virtual Care Modality**</b>                                                 |         |
| Virtual visit/telemedicine – video                                                     | 43 (65) |
| Virtual visit/telemedicine – audio only                                                | 37 (56) |
| Remote monitoring                                                                      | 11 (17) |
| Mobile application                                                                     | 11 (17) |
| Self-monitoring/Wearables                                                              | 8 (12)  |
| Synchronous messaging                                                                  | 4 (6)   |
| Asynchronous messaging                                                                 | 9 (14)  |
| Patient Portals                                                                        | 10 (15) |
| Other/Not specified                                                                    | 7 (11)  |
| <b>Number of Interventions</b>                                                         |         |
| 1 or 2                                                                                 | 46 (70) |
| 3 or 4                                                                                 | 17 (25) |
| 5 to 7                                                                                 | 3 (5)   |
| *medical specialties include ENT, Gastroenterology, Neurology, Gynecology, and Urology |         |
| **percentage totals exceed 100 as studies included multiple modalities                 |         |

243

244 Connections between virtual care modalities within the Quintuple Aim framework and  
 245 NAM quality domains are visualized in Figure 2. Within the Quintuple Aim, the most  
 246 reported category related to patient experience (n=200 indicators), followed by provider

247 experience (n=52), population health outcomes (n=47), health system costs (n=22), and  
 248 equity (n=7). Virtual visits by phone and/or video (n=96) were the most common  
 249 modality of virtual care reported, and was strongly connected to patient experience,  
 250 provider experience, and population health outcomes (Fig 2). Virtual visits (video only)  
 251 (n=60) and remote monitoring (n=59) were the next most common, also connecting  
 252 strongly to patient experience, provider experience, and population health outcomes.  
 253  
 254 Within the NAM quality domains, the most common sub-coded domains included patient  
 255 centeredness (n=66), effectiveness (n=64), sustainability (n=36), and efficiency of care  
 256 (n=36) (Fig 2). Details regarding the frequency of indicators for NAM domains and  
 257 patient experience and provider experience are provided in Supplementary File 4, with  
 258 examples of indicators and their stem groupings in Table 3.

260 **Figure 2: Alluvial diagram connecting virtual care modalities to the Quintuple Aim**  
 261 **and quality domains.** Through the middle are the Quintuple Aim domains, with curved  
 262 bars representing connection to the virtual care modality (left) and NAM quality domains  
 263 (right). For example, the 59 mentions of remote monitoring (left) were mostly connected  
 264 with patient experience, followed by population health outcomes, then provider  
 265 experience. The thick vertical bars show the frequency compared to the other domains:  
 266 virtual visits were the most common modality; patient experience was the most common  
 267 Quintuple Aim domain; and patient-centredness was the most common NAM quality  
 268 domain.

270 **Table 3: Examples of indicator-stem groupings and indicators within the**  
 271 **Quintuple Aim, specific to virtual care.**

| Examples of Indicator-Stem Grouping (NAM Quality Domain) | Examples of Individual Indicators | Examples of Indicator Measurement |
|----------------------------------------------------------|-----------------------------------|-----------------------------------|
|----------------------------------------------------------|-----------------------------------|-----------------------------------|

| <b>Quintuple Aim domain: Patient Experience</b>                                                       |                                                                                                                   |                                                                                                                                                                                                                                                                                                                                                                                                   |
|-------------------------------------------------------------------------------------------------------|-------------------------------------------------------------------------------------------------------------------|---------------------------------------------------------------------------------------------------------------------------------------------------------------------------------------------------------------------------------------------------------------------------------------------------------------------------------------------------------------------------------------------------|
| <p>Patient satisfaction<br/>(<i>Patient centeredness</i>)</p> <p>Usability<br/>(<i>Efficient</i>)</p> | <p>Patient satisfaction of virtual care compared to in-person consultations</p>                                   | <p>5-point Likert scale – proportion of positive responses:<br/>“The clinical care I received during a virtual visit was the same as a face-to-face visit.”</p> <p>Telemedicine usability questionnaire: 18 items, 7-point Likert scale; higher mean score indicates higher satisfaction (usefulness, ease, interface quality, interaction quality, satisfaction and future use, reliability)</p> |
| <p>Effectiveness</p>                                                                                  | <p>Patient-perceived value of the virtual consultation.</p>                                                       | <p>Net promoter score – “recommend virtual visit to a friend”</p> <p>Virtual visits are more convenient than an office visit</p>                                                                                                                                                                                                                                                                  |
| <p>Access to care<br/>(<i>Equitable</i>)</p>                                                          | <p>Ease of navigating access to a video appointment.</p> <p>Support to patients to overcome technical issues.</p> | <p>Proportion of patients requiring help with equipment</p> <p>Proportion of patients having trouble logging on to platform</p>                                                                                                                                                                                                                                                                   |
| <b>Quintuple Aim domain: Provider Experience</b>                                                      |                                                                                                                   |                                                                                                                                                                                                                                                                                                                                                                                                   |
| <p>Provider satisfaction and preference</p>                                                           | <p>Provider satisfaction compared to in-person consultations.</p>                                                 | <p>5-item questionnaire using 0-100 Visual Analog Scales – overall score calculated by averaging responses</p>                                                                                                                                                                                                                                                                                    |
| <p>Infrastructure/organizational capacity<br/>(<i>Sustainable</i>)</p>                                | <p>Perceptions of effectiveness.</p>                                                                              | <p>Telehealth Usability Questionnaire</p>                                                                                                                                                                                                                                                                                                                                                         |
| <p>Provider-patient workload/workflow<br/>(<i>Timely, efficiency</i>)</p>                             | <p>Provider and clinic efficiency.</p>                                                                            | <p>Reduction in ‘no-shows’ and cancelled appointments</p> <p>Decrease in wait times for patients</p>                                                                                                                                                                                                                                                                                              |
| <p>Physician perspective of effectiveness<br/>(<i>Effective</i>)</p>                                  | <p>Ability to evaluate/examine patient.</p>                                                                       | <p>Likert scales – proportion of physicians that agree:<br/>I was confident with my ability to diagnose/make recommendations.<br/>I was able to effectively inform my patient.</p>                                                                                                                                                                                                                |
| <b>Quintuple Aim domain: Population Health &amp; Outcomes</b>                                         |                                                                                                                   |                                                                                                                                                                                                                                                                                                                                                                                                   |

|                                                                     |                                               |                                                                             |
|---------------------------------------------------------------------|-----------------------------------------------|-----------------------------------------------------------------------------|
| Follow-up Care                                                      | 30- or 90-day outpatient follow-up.           | Number or proportion of patients seen in follow-up after virtual visit      |
|                                                                     | Emergency Department use after virtual visit. | Number or proportion of patients seeking emergency care after virtual visit |
| Access to Care                                                      | Program usage.                                | Proportion of participants engaging with the platform/completing program    |
| Clinical outcomes and measures                                      | Clinical effectiveness of care.               | Changes in clinical outcomes/disease markers                                |
|                                                                     | Quality of life.                              | Changes in QoL as measured by validated scales: EQ-5D*, WHO-QL**            |
|                                                                     | Patient safety.                               | Incidence of adverse clinical events                                        |
| <b>Quintuple Aim domain: Cost</b>                                   |                                               |                                                                             |
| Health system costs                                                 | Cost reduction.                               | Cost of standard visit compared to virtual visit                            |
|                                                                     | Cost-effectiveness.                           | Cost of telemedicine implementation and maintenance                         |
| Patient Costs                                                       | Cost-avoidance.                               | Patient travel savings compared to in-office visits                         |
| <b>Quintuple Aim domain: Equity</b>                                 |                                               |                                                                             |
| Accessibility                                                       | Equal access to care.                         | Availability of appropriate connectivity/ technical services in rural areas |
| Financial impact                                                    | Time saved by the patient                     | Reduction in travel time                                                    |
| *EQ-5D: EuroQol-5 Dimensions – health-related quality of life scale |                                               |                                                                             |
| **WHO-QL: World Health Organization-Quality of Life scale           |                                               |                                                                             |

272

273

### 274 Specific Instruments Measuring Quality

275 Throughout data extraction, several existing tools were mentioned for measuring quality  
 276 of care. For patient experience, tools included Telemedicine/Telehealth usability  
 277 questionnaires (n=18 studies); Telemedicine Satisfaction and Usefulness Questionnaire  
 278 (n=3); and Service User Technology Acceptability Questionnaire (n=1). For provider  
 279 experience the Telemedicine/Telehealth Usability Questionnaire (n=2) was used, while



1  
2  
3 280 others only mention 5- and 10-point Likert scales with unique or custom question  
4  
5 281 prompts. No specific measurement tools were mentioned for population health  
6  
7 282 outcomes, costs, or health equity.  
8  
9

10 283

## 11 284 **DISCUSSION**

12  
13  
14 285 This scoping review on quality measures for ambulatory virtual care found that within  
15  
16 286 the Quintuple Aim, the most reported category assessing quality of virtual care was  
17  
18 287 related to patient experience, followed by provider experience, and population health  
19  
20 288 outcomes. There was limited mention of health system costs, patient costs, or equity.  
21

22  
23 289 The most frequently mentioned virtual care modality was virtual visits in video and/or  
24  
25 290 audio, followed by video visits only, remote monitoring programs, mobile applications,  
26  
27 291 and self-monitoring tools. Within the NAM domains of quality for patient and provider  
28  
29 292 experience, effectiveness was most common, followed by patient centeredness and  
30  
31 293 efficiency, with limited mention of sustainability.  
32  
33

34 294

35  
36  
37 295 Best practice guidelines for virtual care are required to realize integration of virtual care  
38  
39 296 across health systems (17,18). This review provides the foundation for identification and  
40  
41 297 refinement of quality indicators in virtual care and highlights current gaps in assessment  
42  
43 298 of virtual care performance indicators. Results indicate that further development of  
44  
45 299 evaluation methods specifically analyzing the equitable and cost-efficient deployment of  
46  
47 300 virtual care are needed. Measurement of quality of virtual care will support  
48  
49 301 understanding performance gaps, and targets for future quality improvement efforts and  
50  
51 302 benchmarking efforts across organizations.  
52  
53  
54  
55  
56  
57  
58  
59  
60

303

**304 Limited Attention on Equity, Sustainability, and Cost**

305 It was noted that the majority of quality indicators were concentrated in specific domains  
306 such as patient experience and/or satisfaction, or provider experience and/or  
307 satisfaction, while the more complex indicators, such as equity, cost, and sustainability,  
308 were not as widely reported. The limited attention on equity is consistent with published  
309 literature, such as the scoping review of reviews which highlights the lack of focus on  
310 equity assessments in virtual care deployments (19). Equity may have been more  
311 challenging to measure and integrate into program evaluation and may have been  
312 considered outside the scope of QI projects or time-sensitive deployments (such as  
313 during the COVID-19 pandemic) (20). This lack of consideration of equity is concerning,  
314 as virtual care has the potential to improve access to care for some typically  
315 underserved populations and worsen access for others (21), making it an essential  
316 consideration in understanding quality of care.

317

318 Our review also noted limited attention in evaluations around sustainability of virtual  
319 care delivery. Sustainability may be considered from multiple perspectives, including if  
320 the patient plans to continue to use virtual options, or if the organization has the means  
321 (infrastructure, IT support etc.) to continue to deliver virtual care after the COVID-19  
322 pandemic restrictions lessened. Further indicators are needed to monitor the continued  
323 need for and use of virtual care to assess if it remains a preferred and feasible option,  
324 especially within hybrid models of care delivery which includes both virtual and in  
325 person options. Considering sustainability is also important while taking a Learning

1  
2  
3 326 Health Systems (LHS) approach across healthcare organizations and systems where  
4  
5 327 the focus is on continuous learning and iterative advancement (22). Sustainability needs  
6  
7 328 to be a key part of this systems-based approach, and thus quality indicators of virtual  
8  
9 329 care that consider sustainability are needed.

10  
11  
12 330

13  
14 331 Indicators within the Quintuple Aim domain of cost were also rarely reported in the  
15  
16 332 literature, for either patient costs or health system costs. This limited inclusion may  
17  
18 333 partly be as cost can be difficult to measure and quantify in rapid virtual care  
19  
20 334 deployments. This finding is consistent with a 2020 scoping review which analyzed the  
21  
22 335 cost-effectiveness of telehealth to the healthcare system, which also highlighted this  
23  
24 336 gap (23). Cost needs to be considered as part of evaluation of quality of virtual care,  
25  
26 337 including in connection with sustainability of the service and the cost implications for  
27  
28 338 patients, which also ties back to the topic of health equity and access to virtual care.

29  
30  
31 339

### 32 33 34 35 340 **Evidence Synthesis of Virtual Care**

36  
37 341 There has been a considerable amount of work published about virtual care, and  
38  
39 342 synthesis of that work. About a third of literature included in this scoping review were  
40  
41 343 reviews themselves; however, these reviews usually were limited and focused on a  
42  
43 344 specific service or modality of virtual care such as patient portals (24), telehealth/phone  
44  
45 345 visits (25,26) and video consultations (27,28). Few reviews assessed approaches or  
46  
47 346 models for evaluating virtual care, or tools which specifically measured quality across  
48  
49 347 multiple domains as identified by the Quintuple Aim and NAM frameworks. To the  
50  
51 348 authors' knowledge, this is the first review which specifically evaluates quality in virtual  
52  
53  
54  
55  
56  
57  
58  
59  
60

1  
2  
3 349 care with a comprehensive approach in defining quality indicators and assessing their  
4  
5 350 use against established quality frameworks.  
6  
7

8 351  
9  
10 352 A report by the Canadian Agency for Drugs and Technology in Health (CADTH) which  
11  
12 353 studied evaluations of virtual care was consistent with our findings (29). The CADTH  
13  
14 354 report stated that evaluations should focus on ensuring the scope of the virtual care  
15  
16 355 visits was appropriate for the care being administered, be conducted systematically, and  
17  
18 356 that cost-analysis or cost-benefit evaluations be conducted with a specific viewpoint in  
19  
20 357 mind – such as a patient or provider (29). The findings of this scoping review support  
21  
22 358 these assertions from a quality perspective. A quality virtual care program is clear in its  
23  
24 359 scope, has dedicated resources for ongoing evaluations, and specifically investigates  
25  
26 360 the impact of the program from the patient perspective, provider perspective, or both.  
27  
28  
29  
30

31 361

### 32 33 362 **Leveraging Review Results: Next Steps**

34  
35 363 This review provides the foundational knowledge base of existing quality indicators of  
36  
37 364 virtual care across domains of quality and organized within established quality  
38  
39 365 frameworks. This knowledge base will be further refined and distilled through a modified  
40  
41 366 Delphi approach with key knowledge users and decision makers, including patients,  
42  
43 367 healthcare professionals, virtual care experts, and policymakers, to help add indicators  
44  
45 368 to address gaps, and rate and rank existing indicators based on feasibility, relevance,  
46  
47 369 and utility. A subset of high-ranked indicators across quality domains will then be  
48  
49 370 translated into a balanced score card for evaluating the quality of virtual care.  
50  
51  
52

53  
54 371  
55  
56  
57  
58  
59  
60

1  
2  
3 372 An understanding of how to define quality in virtual care and measure performance is  
4  
5 373 key to the development and growth of a potential LHS, which aims to enable cycles of  
6  
7 374 continuous learning and improvement to be routinised and embedded across the  
8  
9 375 healthcare system (30). A LHS is the combination of a health system and research  
10  
11 376 system that, at all levels, is anchored on patient's needs, perspectives, and aspirations;  
12  
13 377 driven by timely data and evidence; supported by appropriate decision supports, aligned  
14  
15 378 governance, financial and care delivery arrangements; and enabled with a culture of,  
16  
17 379 and competencies for, rapid learning and improvement (31). Further, it is a system in  
18  
19 380 which science, informatics, incentives, and culture are aligned for continuous  
20  
21 381 improvement and innovation, and thus our domains of quality for virtual care can be  
22  
23 382 integrated into this approach. Ideally, best practices, including best practices in virtual  
24  
25 383 care, are seamlessly embedded in the delivery process, patients and families are active  
26  
27 384 participants in all elements, and new knowledge capture is an integral by-product of  
28  
29 385 delivery experience (30). Ultimately, the deployment of virtual care should follow an LHS  
30  
31 386 approach, with consistent revision and adjustment of virtual care initiatives to reflect  
32  
33 387 dynamic contexts and adapt based on new evidence. Mapping the current knowledge  
34  
35 388 base aims to provide organizations quick references for improving and iterating their  
36  
37 389 virtual care program. Working towards true integration of virtual care into a LHS is  
38  
39 390 subject to further research and implementation.  
40  
41  
42  
43  
44  
45  
46  
47  
48  
49

391

## 392 **Strengths and Limitations**

51  
52 393 This scoping review used a wide range of published and grey sources, covered a vast  
53  
54 394 breadth of literature, and applied rigorous methods for data extraction and coding. The  
55  
56  
57  
58  
59  
60

1  
2  
3 395 body of literature included in this review also represents the current state of publications  
4  
5 396 on virtual care, as the search was updated as the project progressed. However, our  
6  
7 397 search strategy was limited to English only, and relying on the past seven years meant  
8  
9 398 that foundational work on the implementation of virtual care may have been excluded.  
10  
11 399 A key strength of this work was our categorization of existing indicators across  
12  
13 400 established quality frameworks (NAM and sustainability, Quintuple Aim) to identify  
14  
15 401 which quality domains of virtual care are present and lacking within the current  
16  
17 402 literature. However, there is considerable overlap between the NAM domains for  
18  
19 403 categorization, and extensive differences in the way indicators were explained in the  
20  
21 404 published studies, typically with very little detail. Indicators could overlap and routinely fit  
22  
23 405 within more than one quality domain, and the lack of detail provided about each  
24  
25 406 indicator meant that some assumptions were made, leading to subjectivity with current  
26  
27 407 results. For example, patient-centered care was used very differently across studies,  
28  
29 408 with some having it synonymous with patient satisfaction, while others acknowledged  
30  
31 409 the multiple factors and complexity in delivery patient-centered care. To address this  
32  
33 410 limitation we dual-coded all indicators, resolved discrepancy with a third reviewer and  
34  
35 411 will be working with interprofessional decision makers and persons with lived  
36  
37 412 experience as we develop the balanced scorecard. The lack of reporting on how  
38  
39 413 indicators were selected when measuring quality of care, the lack of detail provided, and  
40  
41 414 the lack of reported knowledge user (patient, provider, management etc.) involvement,  
42  
43 415 further highlighted the need for a consensus-based approach to finalize a concise list of  
44  
45 416 virtual care quality indicators across all quality domains.  
46  
47  
48  
49  
50  
51  
52  
53  
54 417  
55  
56  
57  
58  
59  
60

1  
2  
3 418 **CONCLUSION**  
4

5 419 To ensure appropriate delivery of virtual care, it is imperative to understand how to  
6  
7 420 define “quality” in virtual care. By identifying and mapping indicators of quality of virtual  
8  
9 421 care to the Quintuple Aim and the NAM framework, we deepened our understanding of  
10  
11 422 these indicators and identified gaps. The most reported category assessing quality of  
12  
13 423 virtual care was related to patient experience, followed by provider experience, and  
14  
15 424 population health outcomes. There was limited mention of health system costs, patient  
16  
17 425 costs, or equity, which limits our understanding of quality of virtual care initiatives. This  
18  
19 426 highlights the need for development of new indicators to address the gaps, and a  
20  
21 427 consensus-based process with knowledge users to create a prioritized list of relevant  
22  
23 428 quality indicators to monitor virtual care. Future work will further refine the quality  
24  
25 429 indicators through a modified Delphi approach, with the aim to provide decision-makers  
26  
27 430 with a balanced scorecard to monitor and improve quality of virtual care moving forward.  
28  
29  
30  
31  
32

33 431

34  
35 432  
36  
37  
38  
39  
40  
41  
42  
43  
44  
45  
46  
47  
48  
49  
50  
51  
52  
53  
54  
55  
56  
57  
58  
59  
60

1  
2  
3 433 **Author Contributions**  
4

5 434 Conceptualization: Geetha Mukerji  
6

7  
8 435 Formal Analysis: Sam Petrie, Celia Laur, Patricia Rios  
9

10 436 Funding Acquisition: Geetha Mukerji  
11

12 437 Investigation: Sam Petrie, Celia Laur, Toni Mankanjuola, Patricia Rios, Geetha Mukerji,  
13  
14 438 Ally Suarez  
15

16  
17 439 Writing – Original Draft Preparation: Sam Petrie, Celia Laur  
18

19 440 Writing – Reviewing & Editing: Celia Laur, Patricia Rios, Ally Suarez, Toni Mankanjuola,  
20  
21 441 Geetha Mukerji, Onil Bhattacharyya, Emeraldalda Burke  
22  
23

24 442  
25

26 443 **Acknowledgements**  
27

28 444 We would like to thank Vanessa Kishimoto for assistance with title and abstract  
29  
30 445 screening and Becky Skidmore for assistance with developing the literature search.  
31  
32

33 446  
34

35 447 **FUNDING**  
36

37 448 This study was supported by a grant from the Innovation Fund of the Alternative  
38  
39 449 Funding Plan for the Academic Health Sciences Centres of Ontario (Award# WCH-22-  
40  
41 450 004).  
42  
43  
44

45 451  
46  
47

48 452 **CONFLICT OF INTEREST**  
49

50 453 The authors have no conflict of interest to declare.  
51  
52  
53  
54  
55  
56  
57  
58  
59  
60



1  
2  
3 455 **DATA AVAILABILITY STATEMENT**  
4

5 456 No additional data available.  
6  
7  
8  
9  
10  
11  
12  
13  
14  
15  
16  
17  
18  
19  
20  
21  
22  
23  
24  
25  
26  
27  
28  
29  
30  
31  
32  
33  
34  
35  
36  
37  
38  
39  
40  
41  
42  
43  
44  
45  
46  
47  
48  
49  
50  
51  
52  
53  
54  
55  
56  
57  
58  
59  
60

For peer review only

457 **REFERENCES**

- 458 1. Jamieson T, Wallace R, Armstrong K, Agarwal P, Griffin B, Wong I, et al. Virtual  
459 Care: A Framework for a Patient-Centric System [Internet]. Women's College  
460 Hospital Institute for Health Systems Solutions and Virtual Care; 2015 Jun p. 121.  
461 Available from:  
462 [https://www.womenscollegehospital.ca/assets/pdf/wihv/WIHV\\_VirtualHealthSymposium.pdf](https://www.womenscollegehospital.ca/assets/pdf/wihv/WIHV_VirtualHealthSymposium.pdf)  
463
- 464 2. Bhatia RS, Chu C, Pang A, Tadrous M, Stamenova V, Cram P. Virtual care use  
465 before and during the COVID-19 pandemic: a repeated cross-sectional study. *CMAJ*  
466 *Open*. 2021;9(1):E107–14.
- 467 3. Canadian Medical Association, Abacus Data. What Canadians Think about Virtual  
468 Health Care [Internet]. 2020 May. Available from: [https://abacusdata.ca/wp-](https://abacusdata.ca/wp-content/uploads/2020/06/CMA-Abacus-May-2020-Jun-4-ENv2.pdf)  
469 [content/uploads/2020/06/CMA-Abacus-May-2020-Jun-4-ENv2.pdf](https://abacusdata.ca/wp-content/uploads/2020/06/CMA-Abacus-May-2020-Jun-4-ENv2.pdf)
- 470 4. Ashcroft R, Ryan B, Mehta K, Brown J, Lam S, Dolovich L, et al. “Healthcare at its  
471 finest”: Patient perspectives on virtual care appointments in primary care. In: COVID-  
472 19 [Internet]. American Academy of Family Physicians; 2022 [cited 2023 May 5]. p.  
473 2944. Available from: <http://www.annfammed.org/lookup/doi/10.1370/afm.20.s1.2944>
- 474 5. Abrams K, Burrill S, Elsner N. What can health systems do to encourage physicians  
475 to embrace virtual care? [Internet]. Deloitte Center for Health Solutions; 2018 p. 24.  
476 Available from:  
477 [https://www2.deloitte.com/content/dam/insights/us/articles/4407\\_Virtual-care-](https://www2.deloitte.com/content/dam/insights/us/articles/4407_Virtual-care-survey/DI_Virtual-care-survey.pdf)  
478 [survey/DI\\_Virtual-care-survey.pdf](https://www2.deloitte.com/content/dam/insights/us/articles/4407_Virtual-care-survey/DI_Virtual-care-survey.pdf)
- 479 6. Government of Canada. Pan-Canadian virtual care priorities in response to COVID-  
480 19 [Internet]. 2021. Available from: [https://www.canada.ca/en/health-](https://www.canada.ca/en/health-canada/corporate/transparency/health-agreements/bilateral-agreement-pan-canadian-virtual-care-priorities-covid-19.html)  
481 [canada/corporate/transparency/health-agreements/bilateral-agreement-pan-](https://www.canada.ca/en/health-canada/corporate/transparency/health-agreements/bilateral-agreement-pan-canadian-virtual-care-priorities-covid-19.html)  
482 [canadian-virtual-care-priorities-covid-19.html](https://www.canada.ca/en/health-canada/corporate/transparency/health-agreements/bilateral-agreement-pan-canadian-virtual-care-priorities-covid-19.html)
- 483 7. Agency for Healthcare Research and Quality. Quality Indicator Measures [Internet].  
484 Available from: [https://qualityindicators.ahrq.gov/measures/qi\\_resources](https://qualityindicators.ahrq.gov/measures/qi_resources)
- 485 8. Canadian Institute for Health Information. What is an Indicator? [Internet]. Available  
486 from: [https://www.cihi.ca/en/access-data-and-reports/health-system-performance-](https://www.cihi.ca/en/access-data-and-reports/health-system-performance-measurement/what-is-an-indicator)  
487 [measurement/what-is-an-indicator](https://www.cihi.ca/en/access-data-and-reports/health-system-performance-measurement/what-is-an-indicator)
- 488 9. Pflugeisen BM, Mou J. Patient Satisfaction with Virtual Obstetric Care. *Matern Child*  
489 *Health J*. 2017 Jul;21(7):1544–51.
- 490 10. Saiyed S, Nguyen A, Singh R. Physician Perspective and Key Satisfaction  
491 Indicators with Rapid Telehealth Adoption During the Coronavirus Disease 2019  
492 Pandemic. *Telemed J E-Health Off J Am Telemed Assoc*. 2021 Nov;27(11):1225–34.

- 1  
2  
3 493 11. Parmanto B, Lewis ANJ, Graham KM, Bertolet MH. Development of the  
4 494 Telehealth Usability Questionnaire (TUQ). *Int J Telerehabilitation*. 2016;8(1):3–10.
- 5  
6 495 12. Aromataris E, Munn Z, editors. *JBI Manual for Evidence Synthesis* [Internet]. JBI;  
7 496 2020 [cited 2023 May 5]. Available from: [https://jbi-global-](https://jbi-global-wiki.refined.site/space/MANUAL)  
8 497 [wiki.refined.site/space/MANUAL](https://jbi-global-wiki.refined.site/space/MANUAL)
- 9  
10  
11 498 13. Tricco AC, Lillie E, Zarin W, O'Brien KK, Colquhoun H, Levac D, et al. PRISMA  
12 499 Extension for Scoping Reviews (PRISMA-ScR): Checklist and Explanation. *Ann*  
13 500 *Intern Med*. 2018 Oct 2;169(7):467–73.
- 14  
15 501 14. Nundy S, Cooper LA, Mate KS. The Quintuple Aim for Health Care Improvement:  
16 502 A New Imperative to Advance Health Equity. *JAMA*. 2022 Feb 8;327(6):521–2.
- 17  
18 503 15. Institute of Medicine (U.S.), editor. *Crossing the quality chasm: a new health*  
19 504 *system for the 21st century*. Washington, D.C: National Academy Press; 2001. 337 p.
- 20  
21  
22 505 16. Covidence systematic review software [Internet]. Melbourne, Australia: Veritas  
23 506 Health Innovation; Available from: [covidence.org](https://www.covidence.org)
- 24  
25 507 17. Petrie S, Carson D, Peters P, Hurtig AK, LeBlanc M, Simpson H, et al. What a  
26 508 Pandemic Has Taught Us About the Potential for Innovation in Rural Health:  
27 509 Commencing an Ethnography in Canada, the United States, Sweden, and Australia.  
28 510 *Front Public Health*. 2021;9:1836.
- 29  
30  
31 511 18. Enhancing equitable access to virtual care in Canada: Principle-based  
32 512 recommendations for equity [Internet]. 2021. Available from:  
33 513 <https://policybase.cma.ca/link/policy14447>
- 34  
35 514 19. Budhwani S, Fujioka J, Thomas-Jacques T, De Vera K, Challa P, De Silva R, et  
36 515 al. Challenges and strategies for promoting health equity in virtual care: findings and  
37 516 policy directions from a scoping review of reviews. *J Am Med Inform Assoc JAMIA*.  
38 517 2022 Apr 13;29(5):990–9.
- 39  
40  
41 518 20. Crawford A, Serhal E. Digital Health Equity and COVID-19: The Innovation Curve  
42 519 Cannot Reinforce the Social Gradient of Health. *J Med Internet Res*. 2020 Jun  
43 520 2;22(6):e19361.
- 44  
45 521 21. Saeed SA, Masters RM. Disparities in Health Care and the Digital Divide. *Curr*  
46 522 *Psychiatry Rep*. 2021 Jul 23;23(9):61.
- 47  
48  
49 523 22. Shaw J, Brewer LC, Veinot T. Recommendations for Health Equity and Virtual  
50 524 Care Arising From the COVID-19 Pandemic: Narrative Review. *JMIR Form Res*.  
51 525 2021 Apr 5;5(4):e23233.
- 52  
53 526 23. Snoswell CL, Taylor ML, Comans TA, Smith AC, Gray LC, Caffery LJ.  
54 527 Determining if Telehealth Can Reduce Health System Costs: Scoping Review. *J Med*  
55 528 *Internet Res*. 2020 Oct 19;22(10):e17298.

- 1  
2  
3 529 24. Mold F, de Lusignan S, Sheikh A, Majeed A, Wyatt JC, Quinn T, et al. Patients'  
4 530 online access to their electronic health records and linked online services: a  
5 531 systematic review in primary care. *Br J Gen Pract J R Coll Gen Pract*. 2015  
6 532 Mar;65(632):e141-151.
- 7  
8  
9 533 25. Haroon S, Voo TC, Chua H, Tan GL, Lau T. Telemedicine and Haemodialysis  
10 534 Care during the COVID-19 Pandemic: An Integrative Review of Patient Safety,  
11 535 Healthcare Quality, Ethics and the Legal Considerations in Singapore Practice. *Int J*  
12 536 *Environ Res Public Health*. 2022;19(9).
- 13  
14 537 26. Allen Watts K, Malone E, Dionne-Odom JN, McCammon S, Currie E, Hicks J, et  
15 538 al. Can you hear me now?: Improving palliative care access through telehealth. *Res*  
16 539 *Nurs Health*. 2021;44(1):226–37.
- 17  
18  
19 540 27. Andrees V, Klein TM, Augustin M, Otten M. Live interactive teledermatology  
20 541 compared to in-person care - a systematic review. *J Eur Acad Dermatol Venereol*  
21 542 *JEADV*. 2020 Apr;34(4):733–45.
- 22  
23 543 28. Barsom EZ, van Hees E, Bemelman WA, Schijven MP. Measuring patient  
24 544 satisfaction with video consultation: a systematic review of assessment tools and  
25 545 their measurement properties. *Int J Technol Assess Health Care*. 2020 Jun 23;1–7.
- 26  
27  
28 546 29. Hui D, Dolcine B, Loshak H. Approaches to Evaluations of Virtual Care in  
29 547 Primary Care. *Can J Health Technol*. 2022 Jan 12;2(1):es0358.
- 30  
31 548 30. Best Care at Lower Cost: The Path to Continuously Learning Health Care in  
32 549 America [Internet]. Washington, D.C.: National Academies Press; 2013 [cited 2023  
33 550 May 5]. Available from: <http://www.nap.edu/catalog/13444>
- 34  
35 551 31. Lavis JN, Gauvin FP, Mattison CA, Moat KA, Waddell K, Wilson MG, et al. Rapid  
36 552 synthesis: Creating rapid-learning health systems in Canada [Internet]. Hamilton,  
37 553 Canada: McMaster Health Forum; 2018 Dec p. 36. Available from:  
38 554 [https://www.mcmasterforum.org/docs/default-source/product-documents/rapid-](https://www.mcmasterforum.org/docs/default-source/product-documents/rapid-responses/creating-rapid-learning-health-systems-in-canada.pdf?sfvrsn=4)  
39 555 [responses/creating-rapid-learning-health-systems-in-canada.pdf?sfvrsn=4](https://www.mcmasterforum.org/docs/default-source/product-documents/rapid-responses/creating-rapid-learning-health-systems-in-canada.pdf?sfvrsn=4)

556

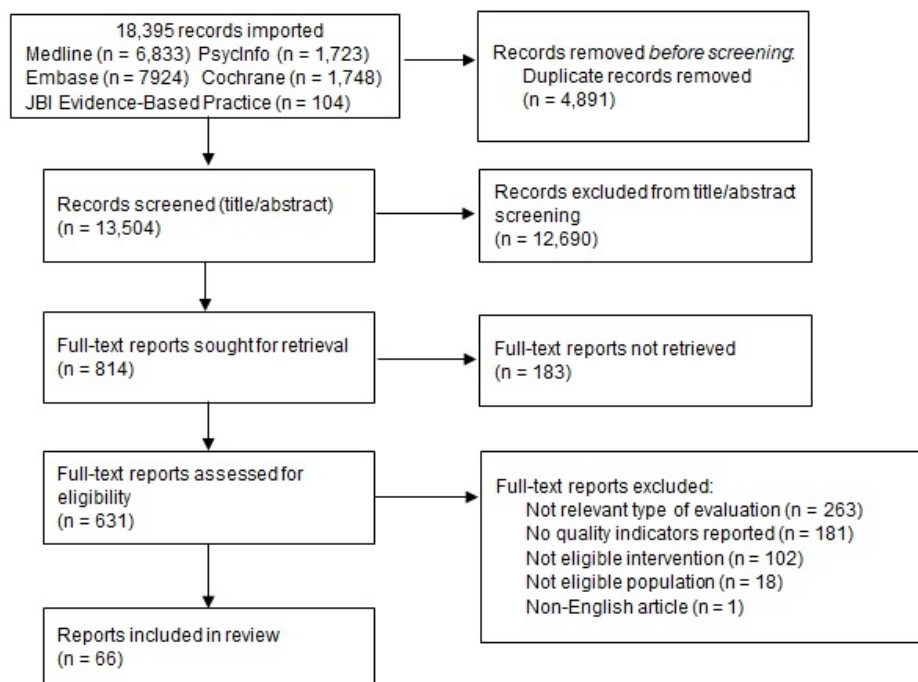

Figure 1: PRISMA study flow diagram

54x39mm (300 x 300 DPI)

1  
2  
3  
4  
5  
6  
7  
8  
9  
10  
11  
12  
13  
14  
15  
16  
17  
18  
19  
20  
21  
22  
23  
24  
25  
26  
27  
28  
29  
30  
31  
32  
33  
34  
35  
36  
37  
38  
39  
40  
41  
42  
43  
44  
45  
46  
47  
48  
49  
50  
51  
52  
53  
54  
55  
56  
57  
58  
59  
60



Figure 2: Alluvial diagram connecting virtual care modalities to the Quintuple Aim and quality domains.

52x52mm (300 x 300 DPI)

**S1 Table - Preferred Reporting Items for Systematic reviews and Meta-Analyses extension for Scoping Reviews (PRISMA-ScR) Checklist**

| SECTION                           | ITEM | PRISMA-ScR CHECKLIST ITEM                                                                                                                                                                                                                                                                                  | REPORTED ON PAGE #       |
|-----------------------------------|------|------------------------------------------------------------------------------------------------------------------------------------------------------------------------------------------------------------------------------------------------------------------------------------------------------------|--------------------------|
| <b>TITLE</b>                      |      |                                                                                                                                                                                                                                                                                                            |                          |
| Title                             | 1    | Identify the report as a scoping review.                                                                                                                                                                                                                                                                   | 1                        |
| <b>ABSTRACT</b>                   |      |                                                                                                                                                                                                                                                                                                            |                          |
| Structured summary                | 2    | Provide a structured summary that includes (as applicable): background, objectives, eligibility criteria, sources of evidence, charting methods, results, and conclusions that relate to the review questions and objectives.                                                                              | 2-3                      |
| <b>INTRODUCTION</b>               |      |                                                                                                                                                                                                                                                                                                            |                          |
| Rationale                         | 3    | Describe the rationale for the review in the context of what is already known. Explain why the review questions/objectives lend themselves to a scoping review approach.                                                                                                                                   | 4-6                      |
| Objectives                        | 4    | Provide an explicit statement of the questions and objectives being addressed with reference to their key elements (e.g., population or participants, concepts, and context) or other relevant key elements used to conceptualize the review questions and/or objectives.                                  | 5-6                      |
| <b>METHODS</b>                    |      |                                                                                                                                                                                                                                                                                                            |                          |
| Protocol and registration         | 5    | Indicate whether a review protocol exists; state if and where it can be accessed (e.g., a Web address); and if available, provide registration information, including the registration number.                                                                                                             | No protocol registered   |
| Eligibility criteria              | 6    | Specify characteristics of the sources of evidence used as eligibility criteria (e.g., years considered, language, and publication status), and provide a rationale.                                                                                                                                       | 7                        |
| Information sources*              | 7    | Describe all information sources in the search (e.g., databases with dates of coverage and contact with authors to identify additional sources), as well as the date the most recent search was executed.                                                                                                  | 6                        |
| Search                            | 8    | Present the full electronic search strategy for at least 1 database, including any limits used, such that it could be repeated.                                                                                                                                                                            | Supplementary Material 2 |
| Selection of sources of evidence† | 9    | State the process for selecting sources of evidence (i.e., screening and eligibility) included in the scoping review.                                                                                                                                                                                      | 7-8                      |
| Data charting process‡            | 10   | Describe the methods of charting data from the included sources of evidence (e.g., calibrated forms or forms that have been tested by the team before their use, and whether data charting was done independently or in duplicate) and any processes for obtaining and confirming data from investigators. | 8-9                      |
| Data items                        | 11   | List and define all variables for which data were sought and any assumptions and simplifications made.                                                                                                                                                                                                     | 8-9                      |
| Critical appraisal of individual  | 12   | If done, provide a rationale for conducting a critical appraisal of included sources of evidence; describe                                                                                                                                                                                                 | N/A                      |



| SECTION                                       | ITEM | PRISMA-ScR CHECKLIST ITEM                                                                                                                                                                       | REPORTED ON PAGE # |
|-----------------------------------------------|------|-------------------------------------------------------------------------------------------------------------------------------------------------------------------------------------------------|--------------------|
| sources of evidence§                          |      | the methods used and how this information was used in any data synthesis (if appropriate).                                                                                                      |                    |
| Synthesis of results                          | 13   | Describe the methods of handling and summarizing the data that were charted.                                                                                                                    | 9                  |
| <b>RESULTS</b>                                |      |                                                                                                                                                                                                 |                    |
| Selection of sources of evidence              | 14   | Give numbers of sources of evidence screened, assessed for eligibility, and included in the review, with reasons for exclusions at each stage, ideally using a flow diagram.                    | 9-10               |
| Characteristics of sources of evidence        | 15   | For each source of evidence, present characteristics for which data were charted and provide the citations.                                                                                     | 10-12              |
| Critical appraisal within sources of evidence | 16   | If done, present data on critical appraisal of included sources of evidence (see item 12).                                                                                                      | N/A                |
| Results of individual sources of evidence     | 17   | For each included source of evidence, present the relevant data that were charted that relate to the review questions and objectives.                                                           | 13-18              |
| Synthesis of results                          | 18   | Summarize and/or present the charting results as they relate to the review questions and objectives.                                                                                            | 13-18              |
| <b>DISCUSSION</b>                             |      |                                                                                                                                                                                                 |                    |
| Summary of evidence                           | 19   | Summarize the main results (including an overview of concepts, themes, and types of evidence available), link to the review questions and objectives, and consider the relevance to key groups. | 18-22              |
| Limitations                                   | 20   | Discuss the limitations of the scoping review process.                                                                                                                                          | 23                 |
| Conclusions                                   | 21   | Provide a general interpretation of the results with respect to the review questions and objectives, as well as potential implications and/or next steps.                                       | 24                 |
| <b>FUNDING</b>                                |      |                                                                                                                                                                                                 |                    |
| Funding                                       | 22   | Describe sources of funding for the included sources of evidence, as well as sources of funding for the scoping review. Describe the role of the funders of the scoping review.                 | 23                 |

JB1 = Joanna Briggs Institute; PRISMA-ScR = Preferred Reporting Items for Systematic reviews and Meta-Analyses extension for Scoping Reviews.

\* Where *sources of evidence* (see second footnote) are compiled from, such as bibliographic databases, social media platforms, and Web sites.

† A more inclusive/heterogeneous term used to account for the different types of evidence or data sources (e.g., quantitative and/or qualitative research, expert opinion, and policy documents) that may be eligible in a scoping review as opposed to only studies. This is not to be confused with *information sources* (see first footnote).

‡ The frameworks by Arksey and O'Malley (6) and Levac and colleagues (7) and the JBI guidance (4, 5) refer to the process of data extraction in a scoping review as data charting.

§ The process of systematically examining research evidence to assess its validity, results, and relevance before using it to inform a decision. This term is used for items 12 and 19 instead of "risk of bias" (which is more applicable to systematic reviews of interventions) to include and acknowledge the various sources of evidence that may be used in a scoping review (e.g., quantitative and/or qualitative research, expert opinion, and policy document).

From: Tricco AC, Lillie E, Zarin W, O'Brien KK, Colquhoun H, Levac D, et al. PRISMA Extension for Scoping Reviews (PRISMA-ScR): Checklist and Explanation. *Ann Intern Med.* 2018;169:467–473. doi: [10.7326/M18-0850](https://doi.org/10.7326/M18-0850).



**Table 1 - Database search strategies**

| <b>Ovid MEDLINE: Epub Ahead of Print, In-Process &amp; Other Non-Indexed Citations, Ovid MEDLINE® Daily and Ovid MEDLINE® 1946-Present</b> |                                                                                                                                                                                                                                                                                                                                                                                                                                                                                                               |
|--------------------------------------------------------------------------------------------------------------------------------------------|---------------------------------------------------------------------------------------------------------------------------------------------------------------------------------------------------------------------------------------------------------------------------------------------------------------------------------------------------------------------------------------------------------------------------------------------------------------------------------------------------------------|
| <b>#</b>                                                                                                                                   | <b>Query</b>                                                                                                                                                                                                                                                                                                                                                                                                                                                                                                  |
| 1                                                                                                                                          | exp telemedicine/                                                                                                                                                                                                                                                                                                                                                                                                                                                                                             |
| 2                                                                                                                                          | exp internet-based intervention/                                                                                                                                                                                                                                                                                                                                                                                                                                                                              |
| 3                                                                                                                                          | (remot* adj2 (consult* or interact* or diagnos* or monitor* or treat* or therap* or care)).tw,kf.                                                                                                                                                                                                                                                                                                                                                                                                             |
| 4                                                                                                                                          | (telemonitor* or telemedicine* or telecommunication* or telehealth*).tw,kf.                                                                                                                                                                                                                                                                                                                                                                                                                                   |
| 5                                                                                                                                          | (((remote or online or video* or text message* or telephone* or phone or phones or email* or virtual* or technolog* or iphone* or smartphone* or mobile application* or mobile app* or teleconferenc* or messenger or whatsapp or skype or zoom or instant messag* or tablet* or e-mail* or asynchronous messag* or synchronous messag* or Videoconferenc* or hotline* or helpline* or call center*) adj3 (communicat* or engag* or discuss* or care or interact* or clinical guidance)) and patient*).tw,kf. |
| 6                                                                                                                                          | (((remote or online or electronic* or video* or text message* or telephone* or phone* or email* or technolog* or virtual* or iphone* or smartphone* or mobile application* or mobile app* or teleconferenc* or messenger or whatsapp or skype or zoom or instant messag* or tablet* or e-mail* or asynchronous messag* or synchronous messag* or Videoconferenc* or hotline* or helpline* or call center*) adj3 (consult* or appointment* or meet or meeting* or visit*)) or virtual tool*).tw,kf.            |
| 7                                                                                                                                          | ((virtual* or digital*) adj3 (healthcare or health care or health strategy)).tw,kw,kf. or (virtual care or virtual health).tw,kf. or (rapid* adj3 virtual*).tw,kf.                                                                                                                                                                                                                                                                                                                                            |
| 8                                                                                                                                          | ((online or digital* or virtual*) adj3 (doctor* or physician* or clinic or clinics or nurse or nurses or nursing or medicine or medical)).tw,kf.                                                                                                                                                                                                                                                                                                                                                              |
| 9                                                                                                                                          | (digital health or digital first).tw,kf.                                                                                                                                                                                                                                                                                                                                                                                                                                                                      |
| 10                                                                                                                                         | ("e health*" or ehealth* or evisit* or "e-visit").tw,kf.                                                                                                                                                                                                                                                                                                                                                                                                                                                      |
| 11                                                                                                                                         | (online adj3 (healthcare or health care)).tw,kf.                                                                                                                                                                                                                                                                                                                                                                                                                                                              |
| 12                                                                                                                                         | ((virtual* or digital*) adj3 (healthcare or health care or health strategy)).tw,kf.                                                                                                                                                                                                                                                                                                                                                                                                                           |
| 13                                                                                                                                         | (teleassist* or "tele-assist*" or teleaudiolog* or "tele-audiolog*" or telebased or "tele-based" or telecancer or "tele-cancer" or "tele-cardiolo*" or telecardiolog* or teleconsult* or "tele-consult*" or telecounselling or "tele-counselling" or telecounseling or "tele-counseling" or teledental or "tele-dental" or telederm* or "tele-derm*" or telediagnos* or "tele-diagnos*" or teledialysis or "tele-dialysis" or teleecho* or "tele-echo*" or teleemerg* or "tele-emerg*" or teleepileps* or     |

|    |                                                                                                                                                                                                                                                                                                                                                                                                                                                                                                                                                                                                                                                                                                                                                                                                                                                    |
|----|----------------------------------------------------------------------------------------------------------------------------------------------------------------------------------------------------------------------------------------------------------------------------------------------------------------------------------------------------------------------------------------------------------------------------------------------------------------------------------------------------------------------------------------------------------------------------------------------------------------------------------------------------------------------------------------------------------------------------------------------------------------------------------------------------------------------------------------------------|
|    | "tele-epileps*" or telefollow* or "tele-follow*" or teleguidance or "tele-guidance" or "tele-health*" or telehome* or "tele-home*" or teleICU or "tele-ICU" or teleintervention* or "tele-intervention*" or telemanag* or "tele-manag*" or telemedicine or "tele-medicine" or telemental* or "tele-mental*" or telemonitor* or "tele-monitor*" or telenurs* or "tele-nurs*" or teleoncolo* or "tele-oncolo*" or teleophthalm* or "tele-ophthalm*" or telepalliat* or "tele-palliat*" or "tele-patholog*" or teleprocedu* or "tele-procedu*" or telepsych* or "tele-psych*" or teleradiol* or "tele-radiol*" or telerefer* or "tele-refer*" or telerehab* or "tele-rehab*" or telesurger* or "tele-surger*" or telesurgic* or "tele-surgic*" or teletherap* or "tele-therap*" or teletreat* or "tele-treat*" or teletriage or "tele-triage").tw,kf. |
| 14 | (tele adj (care or counselling or counseling or diagnos* or health* or intervention* or manag* or therap* or treat* or medicine or medical or nursing)).tw,kf.                                                                                                                                                                                                                                                                                                                                                                                                                                                                                                                                                                                                                                                                                     |
| 15 | ("e-care" or ecare or "e-consult*" or econsult* or "e-diagnos*" or edagnosis* or "e-medicine" or emedicine or "e-nurse*" or enurse* or "e-nursing" or enursing or "e-physician*" or ephysician* or "e-psych*" or epsych* or "e-therapy" or etherapy or mhEALTH or "M-HEALTH").tw,kf.                                                                                                                                                                                                                                                                                                                                                                                                                                                                                                                                                               |
| 16 | ((online or video* or text message* or telephone* or phon* or email* or virtual* or technolog* or iphone* or smartphone* or mobile application* or mobile app* or teleconferenc* or messenger or instant messag* or whatsapp or skype or zoom or tablet* or e-mail* or asynchronous messag* or synchronous messag* or Videoconferenc* or hotline* or helpline* or call center*) adj2 (care or counselling or Counseling or diagnos* or health* or intervention* or manag* or therap* or treat* or medicine or medical or nursing)).tw,kf.                                                                                                                                                                                                                                                                                                          |
| 17 | (virtual* adj3 monitor*).tw,kf.                                                                                                                                                                                                                                                                                                                                                                                                                                                                                                                                                                                                                                                                                                                                                                                                                    |
| 18 | ((implant* sensor* or body sensor*) adj4 (diagnost* or monitor* or report*)).tw,kf.                                                                                                                                                                                                                                                                                                                                                                                                                                                                                                                                                                                                                                                                                                                                                                |
| 19 | mobile health monitor*.tw,kf.                                                                                                                                                                                                                                                                                                                                                                                                                                                                                                                                                                                                                                                                                                                                                                                                                      |
| 20 | 1 or 2 or 3 or 4 or 5 or 6 or 7 or 8 or 9 or 10 or 11 or 12 or 13 or 14 or 15 or 16 or 17 or 18 or 19                                                                                                                                                                                                                                                                                                                                                                                                                                                                                                                                                                                                                                                                                                                                              |
| 21 | "Outcome and Process Assessment, Health Care"/                                                                                                                                                                                                                                                                                                                                                                                                                                                                                                                                                                                                                                                                                                                                                                                                     |
| 22 | Quality Assurance, Health Care/                                                                                                                                                                                                                                                                                                                                                                                                                                                                                                                                                                                                                                                                                                                                                                                                                    |
| 23 | Benchmarking/                                                                                                                                                                                                                                                                                                                                                                                                                                                                                                                                                                                                                                                                                                                                                                                                                                      |
| 24 | Total Quality Management/                                                                                                                                                                                                                                                                                                                                                                                                                                                                                                                                                                                                                                                                                                                                                                                                                          |
| 25 | Quality Improvement/                                                                                                                                                                                                                                                                                                                                                                                                                                                                                                                                                                                                                                                                                                                                                                                                                               |
| 26 | Quality Indicators, Health Care/                                                                                                                                                                                                                                                                                                                                                                                                                                                                                                                                                                                                                                                                                                                                                                                                                   |
| 27 | "Utilization Review"/                                                                                                                                                                                                                                                                                                                                                                                                                                                                                                                                                                                                                                                                                                                                                                                                                              |
| 28 | Patient Outcome Assessment/                                                                                                                                                                                                                                                                                                                                                                                                                                                                                                                                                                                                                                                                                                                                                                                                                        |

|                                              |                                                                                                                                                                                                                                                                                                                                                                                                                                                                                                                     |
|----------------------------------------------|---------------------------------------------------------------------------------------------------------------------------------------------------------------------------------------------------------------------------------------------------------------------------------------------------------------------------------------------------------------------------------------------------------------------------------------------------------------------------------------------------------------------|
| 29                                           | (quality indicat* or quality metric or quality standard* or quality measure* or quality report* or performance measure* or metric or performance metric or usability or care evaluation or benchmark* or scorecard or balanced scorecard or logic model).tw,kf.                                                                                                                                                                                                                                                     |
| 30                                           | (quality adj3 (indicat* or metric* or standard* or measure*)).tw,kf.                                                                                                                                                                                                                                                                                                                                                                                                                                                |
| 31                                           | 21 or 22 or 23 or 24 or 25 or 26 or 27 or 28 or 29 or 30 or 31                                                                                                                                                                                                                                                                                                                                                                                                                                                      |
| 32                                           | 20 and 32                                                                                                                                                                                                                                                                                                                                                                                                                                                                                                           |
| 33                                           | limit 33 to (english language and yr="2015 -Current")                                                                                                                                                                                                                                                                                                                                                                                                                                                               |
| <b>Embase Classic+Embase 1947 to Present</b> |                                                                                                                                                                                                                                                                                                                                                                                                                                                                                                                     |
| 1                                            | telecommunication/                                                                                                                                                                                                                                                                                                                                                                                                                                                                                                  |
| 2                                            | (remot* adj2 (consult* or interact* or diagnos* or monitor* or treat* or therap* or care)).tw,kw.                                                                                                                                                                                                                                                                                                                                                                                                                   |
| 3                                            | (telemonitor* or telemedicine* or telecommunication* or telehealth*).tw,kw.                                                                                                                                                                                                                                                                                                                                                                                                                                         |
| 4                                            | ((remote or online or video* or text message* or telephone* or phone or phones or email* or virtual* or technolog* or iphone* or smartphone* or mobile application* or mobile app* or teleconferenc* or messenger or whatsapp or skype or zoom or instant messag* or tablet* or e-mail* or asynchronous messag* or synchronous messag* or Videoconferenc* or hotline* or helpline* or call center*) adj3 (communicat* or engag* or discuss* or care or interact* or clinical guidance)).tw,kw. and patient*.tw, kw. |
| 5                                            | ((remote or online or electronic* or video* or text message* or telephone* or phone* or email* or technolog* or virtual* or iphone* or smartphone* or mobile application* or mobile app* or teleconferenc* or messenger or whatsapp or skype or zoom or instant messag* or tablet* or e-mail* or asynchronous messag* or synchronous messag* or Videoconferenc* or hotline* or helpline* or call center*) adj3 (consult* or appointment* or meet or meeting* or visit*)) or virtual tool*).tw,kw.                   |
| 6                                            | ((virtual* or digital*) adj3 (healthcare or health care or health strategy)) or (virtual care or virtual health) or (rapid* adj3 virtual*).tw,kw.                                                                                                                                                                                                                                                                                                                                                                   |
| 7                                            | ((online or digital* or virtual*) adj3 (doctor* or physician* or clinic or clinics or nurse or nurses or nursing or medicine or medical)).tw,kw.                                                                                                                                                                                                                                                                                                                                                                    |
| 8                                            | (digital health or digital first).tw,kw.                                                                                                                                                                                                                                                                                                                                                                                                                                                                            |
| 9                                            | ("e health*" or ehealth* or evisit* or "e-visit*").tw,kw.                                                                                                                                                                                                                                                                                                                                                                                                                                                           |
| 10                                           | (online adj3 (healthcare or health care)).tw,kw.                                                                                                                                                                                                                                                                                                                                                                                                                                                                    |
| 11                                           | ((virtual* or digital*) adj3 (healthcare or health care or health strategy)).tw,kw.                                                                                                                                                                                                                                                                                                                                                                                                                                 |

|    |                                                                                                                                                                                                                                                                                                                                                                                                                                                                                                                                                                                                                                                                                                                                                                                                                                                                                                                                                                                                                                                                                                                                                                                                                                                                                                                                                             |
|----|-------------------------------------------------------------------------------------------------------------------------------------------------------------------------------------------------------------------------------------------------------------------------------------------------------------------------------------------------------------------------------------------------------------------------------------------------------------------------------------------------------------------------------------------------------------------------------------------------------------------------------------------------------------------------------------------------------------------------------------------------------------------------------------------------------------------------------------------------------------------------------------------------------------------------------------------------------------------------------------------------------------------------------------------------------------------------------------------------------------------------------------------------------------------------------------------------------------------------------------------------------------------------------------------------------------------------------------------------------------|
| 12 | (teleassist* or "tele-assist*" or teleaudiolog* or "tele-audiolog*" or telebased or "tele-based" or telecancer or "tele-cancer" or "tele-cardiolo*" or telecardiolog* or teleconsult* or "tele-consult*" or telecounselling or "tele-counselling" or telecounseling or "tele-counseling" or teledental or "tele-dental" or telederm* or "tele-derm*" or telediagnos* or "tele-diagnos*" or teledialysis or "tele-dialysis" or teleecho* or "tele-echo*" or teleemerg* or "tele-emerg*" or telepileps* or "tele-epileps*" or telefollow* or "tele-follow*" or teleguidance or "tele-guidance" or "tele-health*" or telehome* or "tele-home*" or teleICU or "tele-ICU" or teleintervention* or "tele-intervention*" or telemanag* or "tele-manag*" or telemedicine or "tele-medicine" or telemental* or "tele-mental*" or telemonitor* or "tele-monitor*" or telenurs* or "tele-nurs*" or teleoncolo* or "tele-oncolo*" or teleophthalm* or "tele-ophthalm*" or telepalliat* or "tele-palliat*" or "tele-patholog*" or teleprocedu* or "tele-procedu*" or telepsych* or "tele-psych*" or teleradiol* or "tele-radiol*" or telerefer* or "tele-refer*" or telerehab* or "tele-rehab*" or telesurger* or "tele-surger*" or telesurgic* or "tele-surgic*" or teletherap* or "tele-therap*" or teletreat* or "tele-treat*" or teletriage or "tele-triage").tw,kw. |
| 13 | (tele adj (care or counselling or counseling or diagnos* or health* or intervention* or manag* or therap* or treat* or medicine or medical or nursing)).tw,kw.                                                                                                                                                                                                                                                                                                                                                                                                                                                                                                                                                                                                                                                                                                                                                                                                                                                                                                                                                                                                                                                                                                                                                                                              |
| 14 | ("e-care" or ecare or "e-consult*" or econsult* or "e-diagnos*" or edagnosis* or "e-medicine" or emedicine or "e-nurse*" or enurse* or "e-nursing" or enursing or "e-physician*" or ephysician* or "e-psych*" or epsych* or "e-therapy" or etherapy or mhHEALTH or "M-HEALTH").tw,kw.                                                                                                                                                                                                                                                                                                                                                                                                                                                                                                                                                                                                                                                                                                                                                                                                                                                                                                                                                                                                                                                                       |
| 15 | ((online or video* or text message* or telephone* or phon* or email* or virtual* or technolog* or iphone* or smartphone* or mobile application* or mobile app* or teleconferenc* or messenger or instant messag* or whatsapp or skype or zoom or tablet* or e-mail* or asynchronous messag* or synchronous messag* or Videoconferenc* or hotline* or helpline* or call center*) adj2 (care or counselling or Counseling or diagnos* or health* or intervention* or manag* or therap* or treat* or medicine or medical or nursing)).tw,kw.                                                                                                                                                                                                                                                                                                                                                                                                                                                                                                                                                                                                                                                                                                                                                                                                                   |
| 16 | (virtual* adj3 monitor*).tw,kw.                                                                                                                                                                                                                                                                                                                                                                                                                                                                                                                                                                                                                                                                                                                                                                                                                                                                                                                                                                                                                                                                                                                                                                                                                                                                                                                             |
| 17 | ((implant* sensor* or body sensor*) adj4 (diagnost* or monitor* or report*)).tw,kw.                                                                                                                                                                                                                                                                                                                                                                                                                                                                                                                                                                                                                                                                                                                                                                                                                                                                                                                                                                                                                                                                                                                                                                                                                                                                         |
| 18 | mobile health monitor*.tw,kw.                                                                                                                                                                                                                                                                                                                                                                                                                                                                                                                                                                                                                                                                                                                                                                                                                                                                                                                                                                                                                                                                                                                                                                                                                                                                                                                               |
| 19 | wearable computer/                                                                                                                                                                                                                                                                                                                                                                                                                                                                                                                                                                                                                                                                                                                                                                                                                                                                                                                                                                                                                                                                                                                                                                                                                                                                                                                                          |
| 20 | or/1-19                                                                                                                                                                                                                                                                                                                                                                                                                                                                                                                                                                                                                                                                                                                                                                                                                                                                                                                                                                                                                                                                                                                                                                                                                                                                                                                                                     |
| 21 | Health care quality/                                                                                                                                                                                                                                                                                                                                                                                                                                                                                                                                                                                                                                                                                                                                                                                                                                                                                                                                                                                                                                                                                                                                                                                                                                                                                                                                        |
| 22 | Benchmarking/                                                                                                                                                                                                                                                                                                                                                                                                                                                                                                                                                                                                                                                                                                                                                                                                                                                                                                                                                                                                                                                                                                                                                                                                                                                                                                                                               |
| 23 | Total quality management/                                                                                                                                                                                                                                                                                                                                                                                                                                                                                                                                                                                                                                                                                                                                                                                                                                                                                                                                                                                                                                                                                                                                                                                                                                                                                                                                   |
| 24 | "utilization review"/                                                                                                                                                                                                                                                                                                                                                                                                                                                                                                                                                                                                                                                                                                                                                                                                                                                                                                                                                                                                                                                                                                                                                                                                                                                                                                                                       |

|                 |                                                                                                                                                                                                                                                                                                                                                                                                                                                                                                                |
|-----------------|----------------------------------------------------------------------------------------------------------------------------------------------------------------------------------------------------------------------------------------------------------------------------------------------------------------------------------------------------------------------------------------------------------------------------------------------------------------------------------------------------------------|
| 25              | (quality indicat* or quality metric or quality standard* or quality measure* or quality report* or performance measure* or metric or performance metric or usability or care evaluation or benchmark* or scorecard or balanced scorecard or logic model).tw,kw                                                                                                                                                                                                                                                 |
| 26              | (quality adj2 (indicat* or metric* or standard* or measure*)).tw,kw.                                                                                                                                                                                                                                                                                                                                                                                                                                           |
| 27              | Or/21-26                                                                                                                                                                                                                                                                                                                                                                                                                                                                                                       |
| 28              | 20 and 27                                                                                                                                                                                                                                                                                                                                                                                                                                                                                                      |
| 29              | limit 28 to (english language and yr="2015 - 2021")                                                                                                                                                                                                                                                                                                                                                                                                                                                            |
| <b>PsycInfo</b> |                                                                                                                                                                                                                                                                                                                                                                                                                                                                                                                |
| 1               | exp telemedicine/                                                                                                                                                                                                                                                                                                                                                                                                                                                                                              |
| 2               | (remot* adj2 (consult* or interact* or diagnos* or monitor* or treat* or therap* or care)).tw,sh.                                                                                                                                                                                                                                                                                                                                                                                                              |
| 3               | (telemonitor* or telemedicine* or telecommunication* or telehealth*).tw,sh.                                                                                                                                                                                                                                                                                                                                                                                                                                    |
| 4               | ((((remote or online or video* or text message* or telephone* or phone or phones or email* or virtual* or technolog* or iphone* or smartphone* or mobile application* or mobile app* or teleconferenc* or messenger or whatsapp or skype or zoom or instant messag* or tablet* or e-mail* or asynchronous messag* or synchronous messag* or Videoconferenc* or hotline* or helpline* or call center*) adj3 (communicat* or engag* or discuss* or care or interact* or clinical guidance)) and patient*).tw,sh. |
| 5               | ((((remote or online or electronic* or video* or text message* or telephone* or phone* or email* or technolog* or virtual* or iphone* or smartphone* or mobile application* or mobile app* or teleconferenc* or messenger or whatsapp or skype or zoom or instant messag* or tablet* or e-mail* or asynchronous messag* or synchronous messag* or Videoconferenc* or hotline* or helpline* or call center*) adj3 (consult* or appointment* or meet or meeting* or visit*)) or virtual tool*).tw,sh.            |
| 6               | ((((virtual* or digital*) adj3 (healthcare or health care or health strategy)) or (virtual care or virtual health) or (rapid* adj3 virtual*)).tw,sh.                                                                                                                                                                                                                                                                                                                                                           |
| 7               | ((online or digital* or virtual*) adj3 (doctor* or physician* or clinic or clinics or nurse or nurses or nursing or medicine or medical)).tw,sh.                                                                                                                                                                                                                                                                                                                                                               |
| 8               | (digital health or digital first).tw,sh.                                                                                                                                                                                                                                                                                                                                                                                                                                                                       |
| 9               | ("e health*" or ehealth* or evisit* or "e-visit*").tw,sh.                                                                                                                                                                                                                                                                                                                                                                                                                                                      |
| 10              | ((virtual* or digital*) adj3 (healthcare or health care or health strategy)).tw,sh.                                                                                                                                                                                                                                                                                                                                                                                                                            |
| 11              | (teleassist* or "tele-assist*" or teleaudiolog* or "tele-audiolog*" or telebased or "tele-based" or telecancer or "tele-cancer" or "tele-cardiolo*" or telecardiolog* or teleconsult* or "tele-consult*" or telecounselling or "tele-counselling" or telecounseling or "tele-counseling" or teledental or                                                                                                                                                                                                      |

|    |                                                                                                                                                                                                                                                                                                                                                                                                                                                                                                                                                                                                                                                                                                                                                                                                                                                                                                                                                                                                                                                    |
|----|----------------------------------------------------------------------------------------------------------------------------------------------------------------------------------------------------------------------------------------------------------------------------------------------------------------------------------------------------------------------------------------------------------------------------------------------------------------------------------------------------------------------------------------------------------------------------------------------------------------------------------------------------------------------------------------------------------------------------------------------------------------------------------------------------------------------------------------------------------------------------------------------------------------------------------------------------------------------------------------------------------------------------------------------------|
|    | "tele-dental" or telederm* or "tele-derm*" or telediagnos* or "tele-diagnos*" or teledialysis or "tele-dialysis" or teleecho* or "tele-echo*" or teleemerg* or "tele-emerg*" or teleepileps* or "tele-epileps*" or telefollow* or "tele-follow*" or teleguidance or "tele-guidance" or "tele-health*" or telehome* or "tele-home*" or teleICU or "tele-ICU" or teleintervention* or "tele-intervention*" or telemanag* or "tele-manag*" or telemedicine or "tele-medicine" or telemental* or "tele-mental*" or telemonitor* or "tele-monitor*" or telenurs* or "tele-nurs*" or teleoncolo* or "tele-oncolo*" or teleophthalm* or "tele-ophthalm*" or telepalliat* or "tele-palliat*" or "tele-patholog*" or teleprocedu* or "tele-procedu*" or telepsych* or "tele-psych*" or teleradiol* or "tele-radiol*" or telerefer* or "tele-refer*" or telerehab* or "tele-rehab*" or telesurger* or "tele-surger*" or telesurgic* or "tele-surgic*" or teletherap* or "tele-therap*" or teletreat* or "tele-treat*" or teletriage or "tele-triage").tw,sh. |
| 12 | (tele adj (care or counselling or counseling or diagnos* or health* or intervention* or manag* or therap* or treat* or medicine or medical or nursing)).tw,sh.                                                                                                                                                                                                                                                                                                                                                                                                                                                                                                                                                                                                                                                                                                                                                                                                                                                                                     |
| 13 | ("e-care" or ecare or "e-consult*" or econsult* or "e-diagnos*" or ediagnosis* or "e-medicine" or emedicine or "e-nurse*" or enurse* or "e-nursing" or enursing or "e-physician*" or ephysician* or "e-psych*" or epsych* or "e-therapy" or etherapy or mhEALTH or "M-HEALTH").tw,sh.                                                                                                                                                                                                                                                                                                                                                                                                                                                                                                                                                                                                                                                                                                                                                              |
| 14 | ((online or video* or text message* or telephone* or phon* or email* or virtual* or technolog* or iphone* or smartphone* or mobile application* or mobile app* or teleconferenc* or messenger or instant messag* or whatsapp or skype or zoom or tablet* or e-mail* or asynchronous messag* or synchronous messag* or Videoconferenc* or hotline* or helpline* or call center*) adj2 (care or counselling or Counseling or diagnos* or health* or intervention* or manag* or therap* or treat* or medicine or medical or nursing)).tw,sh.                                                                                                                                                                                                                                                                                                                                                                                                                                                                                                          |
| 15 | (virtual* adj3 monitor*).tw,sh.                                                                                                                                                                                                                                                                                                                                                                                                                                                                                                                                                                                                                                                                                                                                                                                                                                                                                                                                                                                                                    |
| 16 | ((implant* sensor* or body sensor*) adj4 (diagnost* or monitor* or report*)).tw,sh.                                                                                                                                                                                                                                                                                                                                                                                                                                                                                                                                                                                                                                                                                                                                                                                                                                                                                                                                                                |
| 17 | mobile health monitor*.tw,sh.                                                                                                                                                                                                                                                                                                                                                                                                                                                                                                                                                                                                                                                                                                                                                                                                                                                                                                                                                                                                                      |
| 18 | (online adj3 (healthcare or health care)).tw,sh.                                                                                                                                                                                                                                                                                                                                                                                                                                                                                                                                                                                                                                                                                                                                                                                                                                                                                                                                                                                                   |
| 19 | 1 or 2 or 3 or 4 or 5 or 6 or 7 or 8 or 9 or 10 or 11 or 12 or 13 or 14 or 15 or 16 or 17 or 18                                                                                                                                                                                                                                                                                                                                                                                                                                                                                                                                                                                                                                                                                                                                                                                                                                                                                                                                                    |
| 20 | (quality indicat* or quality metric or quality standard* or quality measure* or quality report* or performance measure* or metric or performance metric or usability or care evaluation or benchmark* or scorecard or balanced scorecard or logic model).tw,sh.                                                                                                                                                                                                                                                                                                                                                                                                                                                                                                                                                                                                                                                                                                                                                                                    |
| 21 | (quality adj3 (indicat* or metric* or standard* or measure*)).tw,sh.                                                                                                                                                                                                                                                                                                                                                                                                                                                                                                                                                                                                                                                                                                                                                                                                                                                                                                                                                                               |
| 22 | exp "quality of services"/                                                                                                                                                                                                                                                                                                                                                                                                                                                                                                                                                                                                                                                                                                                                                                                                                                                                                                                                                                                                                         |
| 23 | exp "Quality of Care"/                                                                                                                                                                                                                                                                                                                                                                                                                                                                                                                                                                                                                                                                                                                                                                                                                                                                                                                                                                                                                             |
| 24 | exp Program Evaluation/                                                                                                                                                                                                                                                                                                                                                                                                                                                                                                                                                                                                                                                                                                                                                                                                                                                                                                                                                                                                                            |

|     |                                                                                                                                                                                                                                                                   |
|-----|-------------------------------------------------------------------------------------------------------------------------------------------------------------------------------------------------------------------------------------------------------------------|
| 25  | 20 or 21 or 22 or 23 or 24                                                                                                                                                                                                                                        |
| 26  | 19 and 25                                                                                                                                                                                                                                                         |
| 27  | limit 26 to (english language and yr="2015 - 2021")                                                                                                                                                                                                               |
|     | Cochrane Library                                                                                                                                                                                                                                                  |
| #1  | MeSH descriptor: [Telemedicine] explode all trees                                                                                                                                                                                                                 |
| #2  | MeSH descriptor: [Internet-Based Intervention] explode all trees                                                                                                                                                                                                  |
| #3  | (remote consult*) or (remote interact*) pr (remote diagnos*) or (remote monitor*) or (remote treat*) or (remote therap*) or (remote care):ti,ab,kw                                                                                                                |
| #4  | (virtual health*) or (digital health*) or (online health*) or (ehealth*) or (mobile health*):ti,ab, kw                                                                                                                                                            |
| #5  | #1 or #2 or #3 or #4                                                                                                                                                                                                                                              |
| #6  | MeSH descriptor: [Quality of Health Care] this term only                                                                                                                                                                                                          |
| #7  | MeSH descriptor: [Outcome and Process Assessment, Health Care] this term only                                                                                                                                                                                     |
| #8  | MeSH descriptor: [Quality Assurance, Health Care] this term only                                                                                                                                                                                                  |
| #9  | MeSH descriptor: [Benchmarking] this term only                                                                                                                                                                                                                    |
| #10 | MeSH descriptor: [Total Quality Management] this term only                                                                                                                                                                                                        |
| #11 | MeSH descriptor: [Quality Improvement] this term only                                                                                                                                                                                                             |
| #12 | MeSH descriptor: [Quality Indicators, Health Care] this term only                                                                                                                                                                                                 |
| #13 | MeSH descriptor: [Utilization Review] this term only                                                                                                                                                                                                              |
| #14 | MeSH descriptor: [Patient Outcome Assessment] this term only                                                                                                                                                                                                      |
| #15 | (quality indicat*) or (quailty metric*) or (quality standard*) or (quality measure*) or (quality report*) or (performance measure*) or (performance metric*) or (usability) or (care evaluation) or (scorecard) or (balanced scorecard) or (logic model):ti,ab,kw |
| #16 | #6 or #7 or #8 or #9 or #10 or #11 or #12 or #13 or #14 or #15                                                                                                                                                                                                    |
| #17 | #5 and #16 with Cochrane Library publication date Between Jan 2015 and Present                                                                                                                                                                                    |

**Table 2 - Grey Literature Search**

|                                  |
|----------------------------------|
| <b>Targeted Website Searches</b> |
|----------------------------------|

| <i>Organization name &amp; website URL</i>                                                                                                                                                                                                                           | <i>Search strategy(s)/ terms searched</i>                                                                                                         |
|----------------------------------------------------------------------------------------------------------------------------------------------------------------------------------------------------------------------------------------------------------------------|---------------------------------------------------------------------------------------------------------------------------------------------------|
| McMaster Health Forum<br><a href="http://www.healthsystemevidence.org">www.healthsystemevidence.org</a>                                                                                                                                                              | 1. (virtual care OR digital health) AND quality<br>2. Telemedicine AND quality indicators                                                         |
| Publications Canada<br><a href="https://publications.gc.ca">https://publications.gc.ca</a>                                                                                                                                                                           | 1. Virtual care<br>2. Telemedicine<br>3. eHealth                                                                                                  |
| Health Quality Ontario<br><a href="http://www.hqontario.ca/Evidence-to-Improve-Care/Health-Technology-Assessment">http://www.hqontario.ca/Evidence-to-Improve-Care/Health-Technology-Assessment</a>                                                                  | 1. Virtual care<br>2. Telemedicine<br>3. Telehealth                                                                                               |
| NICE<br><a href="http://www.nice.org.uk">www.nice.org.uk</a>                                                                                                                                                                                                         | 1. Virtual care<br>2. Telemedicine<br>3. Telehealth<br>4. Digital care                                                                            |
| AHRQ - EPC<br><a href="http://www.ahrq.gov/research/findings/evidence-based-reports/search.html">http://www.ahrq.gov/research/findings/evidence-based-reports/search.html</a>                                                                                        | 1. Virtual care<br>2. Telemedicine<br>3. Telehealth                                                                                               |
| AHRQ – EHC<br><a href="https://effectivehealthcare.ahrq.gov/products-tools/">https://effectivehealthcare.ahrq.gov/products-tools/</a>                                                                                                                                | 1. Virtual care<br>2. Telemedicine<br>3. Telehealth                                                                                               |
| Canadian Medical Association<br><a href="http://www.cma.ca">www.cma.ca</a>                                                                                                                                                                                           | 1. Virtual care<br>2. Telemedicine<br>3. Telehealth                                                                                               |
| Institute for Healthcare Improvement – White Papers<br><a href="http://www.ihq.org">www.ihq.org</a>                                                                                                                                                                  | N/A – no search function, reviewed ‘Publications’ and ‘White Papers’ section of site                                                              |
| Health Quality Council of Alberta<br><a href="http://hqca.ca/studies-and-reviews/completed-reviews/">http://hqca.ca/studies-and-reviews/completed-reviews/</a>                                                                                                       | 1. Virtual care<br>2. Telemedicine<br>3. Telehealth                                                                                               |
| INATHA Secretariat<br><a href="http://www.inahta.org/publications">http://www.inahta.org/publications</a>                                                                                                                                                            | 1. Virtual care<br>2. Telemedicine<br>3. Telehealth                                                                                               |
| WHO Health Evidence Network<br><a href="http://www.euro.who.int/en/what-we-do/data-and-evidence/health-evidence-network-hen/publications/by-keyword">http://www.euro.who.int/en/what-we-do/data-and-evidence/health-evidence-network-hen/publications/by-keyword</a> | 1. Virtual care<br>2. Telemedicine<br>3. Telehealth                                                                                               |
| <b>Targeted Database Searches</b>                                                                                                                                                                                                                                    |                                                                                                                                                   |
| <i>Database name &amp; URL</i>                                                                                                                                                                                                                                       | <i>Search strategy(s)/ terms searched</i>                                                                                                         |
| Google Scholar<br><a href="http://scholar.google.com">scholar.google.com</a>                                                                                                                                                                                         | 1. “virtual care” AND quality indicators<br>2. Telemedicine AND quality indicators<br>3. eHealth AND quality indicators                           |
| MedRXiv<br><a href="http://www.medrxiv.org">www.medrxiv.org</a>                                                                                                                                                                                                      | 1. Virtual care quality indicator<br>2. Telemedicine quality indicator<br>Results screened by 1 reviewer, 23 items selected for further screening |



|                                                                           |                                                                                |
|---------------------------------------------------------------------------|--------------------------------------------------------------------------------|
| OpenGrey<br><a href="http://www.opengrey.eu/">http://www.opengrey.eu/</a> | 1. Virtual care<br>Telemedicine                                                |
| <b>Targeted Journal Search</b>                                            |                                                                                |
| <i>Journal Name</i>                                                       | <i>Search strategy(s)/ terms searched</i>                                      |
| Journal of Medical Internet Research                                      | Hand-searched (reviewed table of contents) of all editions in previous 2 years |
| Lancet Digital Health                                                     | Hand-searched (reviewed table of contents) of all editions in previous 2 years |
| Nature Digital Medicine                                                   | Hand-searched (reviewed table of contents) of all editions in previous 2 years |

### Screening Criteria

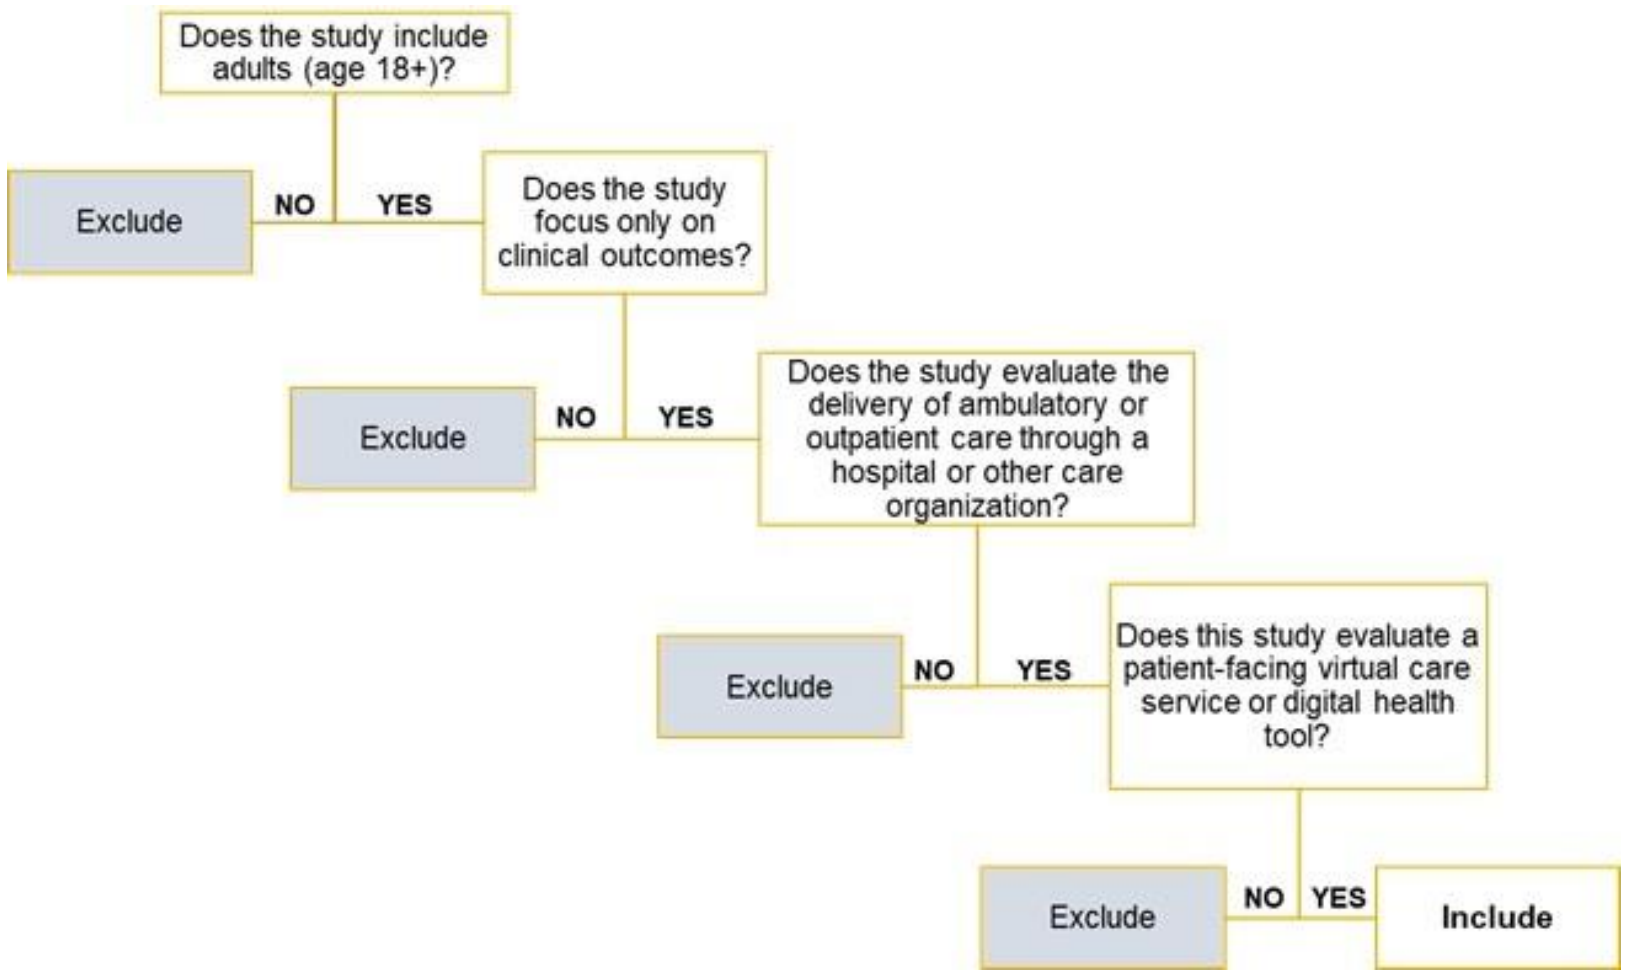

**Table: Frequency of NAM quality domain sub-codes.**

| <i>NAM Quality Domain</i>                                         | <b>Patient Experience<br/>(n=200)</b> | <b>Provider Experience<br/>(n=52)</b> |
|-------------------------------------------------------------------|---------------------------------------|---------------------------------------|
| <i>Effective (n=64)<br/>[n (%)]</i>                               | 52 (81)                               | 12 (19)                               |
| <i>Equitable (n=25)<br/>[n (%)]</i>                               | 24 (96)                               | 1 (4)                                 |
| <i>Efficient (n=36)<br/>[n (%)]</i>                               | 30 (83)                               | 6 (17)                                |
| <i>Patient-centered (n=66)<br/>[n (%)]</i>                        | 60 (91)                               | 6 (9)                                 |
| <i>Safe (n=10)<br/>[n (%)]</i>                                    | 8 (80)                                | 2 (20)                                |
| <i>Timely (n=9)<br/>[n (%)]</i>                                   | 7 (78)                                | 2 (22)                                |
| <i>Sustainable (n=36)<br/>[n (%)]</i>                             | 16 (44)                               | 20 (56)                               |
| <i>Composite (n=6)<br/>[n (%)]</i>                                | 3 (50)                                | 3 (50)                                |
| *Indicators that address more than one of the NAM quality domains |                                       |                                       |

# BMJ Open

## Quality measures of virtual care in ambulatory healthcare environments: A scoping review

|                                 |                                                                                                                                                                                                                                                                                                                                                                                                                                                                                                                                                                                                                                                                                                                                                                                                                                                                                                                                                                                                                                                                                                                                                                                                                                                          |
|---------------------------------|----------------------------------------------------------------------------------------------------------------------------------------------------------------------------------------------------------------------------------------------------------------------------------------------------------------------------------------------------------------------------------------------------------------------------------------------------------------------------------------------------------------------------------------------------------------------------------------------------------------------------------------------------------------------------------------------------------------------------------------------------------------------------------------------------------------------------------------------------------------------------------------------------------------------------------------------------------------------------------------------------------------------------------------------------------------------------------------------------------------------------------------------------------------------------------------------------------------------------------------------------------|
| Journal:                        | <i>BMJ Open</i>                                                                                                                                                                                                                                                                                                                                                                                                                                                                                                                                                                                                                                                                                                                                                                                                                                                                                                                                                                                                                                                                                                                                                                                                                                          |
| Manuscript ID                   | bmjopen-2023-078214.R2                                                                                                                                                                                                                                                                                                                                                                                                                                                                                                                                                                                                                                                                                                                                                                                                                                                                                                                                                                                                                                                                                                                                                                                                                                   |
| Article Type:                   | Original research                                                                                                                                                                                                                                                                                                                                                                                                                                                                                                                                                                                                                                                                                                                                                                                                                                                                                                                                                                                                                                                                                                                                                                                                                                        |
| Date Submitted by the Author:   | 20-Mar-2024                                                                                                                                                                                                                                                                                                                                                                                                                                                                                                                                                                                                                                                                                                                                                                                                                                                                                                                                                                                                                                                                                                                                                                                                                                              |
| Complete List of Authors:       | <p>Petrie, Samuel; University Health Network, Ted Rogers Centre for Heart Research; University of Toronto, Institute of Health Policy, Management and Evaluation</p> <p>Laur, Celia ; Women's College Hospital, Women's College Institute for Health Systems Solutions and Virtual Care; University of Toronto, Institute of Health Policy, Management and Evaluation</p> <p>Rios, Patricia; Women's College Hospital, Women's College Institute for Health Systems Solutions and Virtual Care</p> <p>Suarez, Ally; Women's College Hospital, Women's College Institute for Health Systems Solutions and Virtual Care</p> <p>Makanjuola, Oluwatoni; Women's College Hospital, Women's College Institute for Health Systems Solutions and Virtual Care</p> <p>Burke, Emeraldalda; Women's College Hospital, Women's College Institute for Health Systems Solutions and Virtual Care</p> <p>Bhattacharyya, Onil; University of Toronto, Family and Community Medicine; Women's College Hospital, Women's College Institute for Health Systems Solutions and Virtual Care</p> <p>Mukerji, Geetha; Women's College Hospital, Women's College Institute for Health Systems Solutions and Virtual Care; University of Toronto, Temerty Faculty of Medicine</p> |
| <b>Primary Subject Heading</b>: | Health services research                                                                                                                                                                                                                                                                                                                                                                                                                                                                                                                                                                                                                                                                                                                                                                                                                                                                                                                                                                                                                                                                                                                                                                                                                                 |
| Secondary Subject Heading:      | Evidence based practice                                                                                                                                                                                                                                                                                                                                                                                                                                                                                                                                                                                                                                                                                                                                                                                                                                                                                                                                                                                                                                                                                                                                                                                                                                  |
| Keywords:                       | Quality in health care < HEALTH SERVICES ADMINISTRATION & MANAGEMENT, Telemedicine < BIOTECHNOLOGY & BIOINFORMATICS, Patient-Centered Care, Health Equity                                                                                                                                                                                                                                                                                                                                                                                                                                                                                                                                                                                                                                                                                                                                                                                                                                                                                                                                                                                                                                                                                                |
|                                 |                                                                                                                                                                                                                                                                                                                                                                                                                                                                                                                                                                                                                                                                                                                                                                                                                                                                                                                                                                                                                                                                                                                                                                                                                                                          |

SCHOLARONE™  
Manuscripts



I, the Submitting Author has the right to grant and does grant on behalf of all authors of the Work (as defined in the below author licence), an exclusive licence and/or a non-exclusive licence for contributions from authors who are: i) UK Crown employees; ii) where BMJ has agreed a CC-BY licence shall apply, and/or iii) in accordance with the terms applicable for US Federal Government officers or employees acting as part of their official duties; on a worldwide, perpetual, irrevocable, royalty-free basis to BMJ Publishing Group Ltd ("BMJ") its licensees and where the relevant Journal is co-owned by BMJ to the co-owners of the Journal, to publish the Work in this journal and any other BMJ products and to exploit all rights, as set out in our [licence](#).

The Submitting Author accepts and understands that any supply made under these terms is made by BMJ to the Submitting Author unless you are acting as an employee on behalf of your employer or a postgraduate student of an affiliated institution which is paying any applicable article publishing charge ("APC") for Open Access articles. Where the Submitting Author wishes to make the Work available on an Open Access basis (and intends to pay the relevant APC), the terms of reuse of such Open Access shall be governed by a Creative Commons licence – details of these licences and which [Creative Commons](#) licence will apply to this Work are set out in our licence referred to above.

Other than as permitted in any relevant BMJ Author's Self Archiving Policies, I confirm this Work has not been accepted for publication elsewhere, is not being considered for publication elsewhere and does not duplicate material already published. I confirm all authors consent to publication of this Work and authorise the granting of this licence.

1  
2  
3 1 Quality measures of virtual care in ambulatory healthcare environments: A scoping  
4 review  
5 2  
6 3

8 4 Samuel Petrie (ORCID: 0000-0001-6809-6027)<sup>1,3†</sup>, Celia V Laur (ORCID: 0000-0003-  
9 4555-1407)<sup>2,3†</sup>, Patricia Rios (ORCID: 0000-0003-2599-282X)<sup>2</sup>, Ally Suarez<sup>2</sup>, Oluwatoni  
10 5 Makanjuola<sup>2</sup>, Emeraldal Burke<sup>2</sup>, Onil Bhattacharyya (ORCID: 0000-0001-5219-7288)<sup>2,3,4</sup>,  
11 6 Geetha Mukerji (ORCID:0000-0002-6477-9848)<sup>2,3,5\*</sup>  
12 7  
13 8

15 9  
16 10  
17 11  
18 12  
19 13  
20 14  
21 15  
22 16  
23 17  
24 18  
25 19  
26 20  
27 21  
28 22  
29 23  
30 24  
31 25  
32 26  
33 27  
34 28  
35 29  
36 30  
37 31  
38 32  
39 33  
40 34  
41 35  
42 36  
43 37  
44 38  
45 39  
46 40  
47 41  
48 42  
49 43  
50 44  
51 45  
52 46  
53 47  
54 48  
55 49  
56 50  
57 51  
58 52  
59 53  
60 54

1 Ted Rogers Centre for Heart Research, University Health Network, Toronto, ON,  
Canada

2 Women's College Institute for Health Systems Solutions and Virtual Care, Women's  
College Hospital, Toronto, ON, Canada

3 Institute of Health Policy, Management and Evaluation, University of Toronto, Toronto,  
ON, Canada

4 Department of Family & Community Medicine, Temerty Faculty of Medicine, University  
of Toronto, Toronto, ON, Canada

5 Department of Medicine, Temerty Faculty of Medicine, University of Toronto, Toronto,  
ON, Canada

\*Corresponding Author: Geetha Mukerji, Women's College Hospital Institute for Health  
System Solutions & Virtual Care, Rm 3414, 76 Grenville Street, Toronto, Ontario M5S  
1B3; e-mail: [geetha.mukerji@wchospital.ca](mailto:geetha.mukerji@wchospital.ca)

†These authors contributed equally to this work

**Keywords:** Quality Improvement; Quality Indicators, Health Care; Delivery of Health  
Care; Virtual Medicine

**ABSTRACT**

**Objectives:** Delivery of virtual care increased throughout the COVID-19 pandemic and persisted after physical distancing measures ended. However, little is known about how to measure the quality of virtual care, as current measures focus on in-person care and may not apply to a virtual context. This scoping review aims to understand the connections between virtual care modalities used with ambulatory patient populations and quality measures across the Quintuple Aim ( provider experience, patient experience, per capita cost, population health, and health equity).

**Design:** Virtual care was considered any interaction between patients and/or their circle of care occurring remotely using any form of information technology. Five databases (Medline, Embase, PsycInfo, Cochrane Library, JBI) and grey literature sources (11 websites, 3 search engines) were searched from 2015-June 2021 and again in August 2022 for publications that analysed virtual care in ambulatory settings. Indicators were extracted, double coded into the Quintuple Aim framework; patient and provider experience indicators were further categorized based on the National Academy of Medicine quality framework (safety, effectiveness, patient-centeredness, timeliness, efficiency, and equity). Sustainability was added to capture potential for continued use of virtual care.

**Results:** 13,504 citations were double screened resulting in 631 full-text articles, 66 of which were included. Common modalities included video or audio visits (n=43), remote monitoring (n=11), and mobile applications (n=11). The most common quality indicators were related to patient experience (n=58 articles), followed by provider experience (n=25), population health outcomes (n=23), and health system costs (n=19).

1  
2  
3 55 **Conclusions:** The connections between virtual care modalities and quality domains  
4  
5 56 identified here can inform clinicians, administrators, and other decision makers how to  
6  
7 57 monitor quality of virtual care and provides insights into gaps in current quality  
8  
9 58 measures. Next steps include development of a balanced scorecard of virtual care  
10  
11 59 quality indicators for ambulatory settings to inform quality improvement.  
12  
13  
14  
15  
16

### 17 61 **Strengths and limitations of this study**

- 19 62 • The methodology used for this review was broad in scope, seeking to collate a  
20  
21 63 comprehensive list of quality indicators of virtual care and included both published  
22  
23 64 and grey literature
- 25 65 • Used established scoping review methods for literature search, study selection, data  
26  
27 66 collection, coding, and reporting
- 29 67 • to the quality indicators were mapped and categorized into established quality  
30  
31 68 frameworks including the Quintuple Aim and the National Academy of Medicine  
32  
33 69 quality domains
- 35 70 • Literature search was limited to articles published after 2015 and available in English  
36  
37 71 language only
- 39 72 • Categorization of indicators was complicated by the lack of reported detail  
40  
41  
42  
43  
44  
45  
46  
47  
48  
49  
50  
51  
52  
53  
54  
55  
56  
57  
58  
59  
60



## 74 INTRODUCTION

75 Virtual care is defined as any interaction between patients and/or caregivers and their  
76 healthcare providers (or “circle of care”) that occurs remotely and is facilitated through  
77 digital communication or other information technologies (1). Prior to the COVID-19  
78 pandemic, virtual care was largely underutilized for delivering healthcare services in  
79 Canada (2). The COVID-19 pandemic changed the global healthcare landscape and  
80 accelerated the implementation and access to virtual care for many patients (2).  
81 Although utilization of virtual care decreased after pandemic restrictions eased, the  
82 demands for the option to virtual care persist with many patients and/or caregivers  
83 appreciating the convenience that virtual care affords(3,4). Healthcare providers also  
84 see the value of virtual care in specific situations due to its’ potential to improve patient  
85 access to care especially for those with mobility issues or living in rural/remote areas,  
86 and for maintaining connections with patients in between in-person visits (5). The future  
87 of healthcare delivery will require the integration of both virtual and in-person modalities  
88 across the continuum of care (6). To meet these needs, virtual care needs to be  
89 accessible and high quality; however, there is little understanding of what constitutes a  
90 ‘quality’ encounter through virtual care for both patients and providers. Continued use  
91 and integration of virtual care into standard practice, in part, depends on its impact on  
92 the quality of care and the experiences of patients, caregivers, and healthcare  
93 providers.

94  
95 Quality indicators are standardized, evidence-based measures that can be used to track  
96 and compare health outcomes and performance over time and across different

1  
2  
3 97 organizations (7,8). Measurement of these indicators can identify gaps in care delivery  
4  
5 98 and inform quality improvement (QI) efforts within an organization, across health  
6  
7 99 systems, and across geographical boundaries. However, traditional indicators to assess  
8  
9  
10 100 quality in healthcare primarily focus on in-person care and may have limited applicability  
11  
12 101 to care delivered virtually. While some literature on virtual care indicators have been  
13  
14 102 published, most studies focus solely within a specific clinical area (e.g., obstetrics,  
15  
16 103 cardiology, etc.) or few domains of interest (e.g., acceptability, satisfaction etc.), limiting  
17  
18 104 the scope and applicability for healthcare organizations to evaluate what constitutes  
19  
20 105 “quality” in virtual care (9–11).  
21  
22  
23  
24 106

25  
26 107 This scoping review was conducted with the aim to characterize existing quality  
27  
28 108 indicators used to evaluate modalities of virtual care and categorize the indicators  
29  
30 109 across the Quintuple Aim framework and National Academy of Medicine (NAM) quality  
31  
32 110 framework (safety, effectiveness, patient-centeredness, timeliness, efficiency, and  
33  
34 111 equity). Sustainability was added to capture potential for continued use of virtual care.  
35  
36  
37 112 Our review focused on ambulatory patients as virtual care has a considerable role for  
38  
39 113 access to care; hospitalized in-patients have unique characteristics with higher acuity  
40  
41 114 rendering higher need for in-person care and therefore not included in this review.  
42  
43  
44 115 This work will provide the foundation for identification and categorization of quality  
45  
46 116 indicators that can inform clinicians, healthcare managers, and other decision makers  
47  
48 117 how best to monitor quality of virtual care, identify performance gaps, and target areas  
49  
50 118 for future improvement efforts.  
51  
52  
53  
54 119

## 120 **METHODS**

121 The scoping review methodology used in the study was guided by the Joanna Briggs  
122 Institute (JBI) Manual for Evidence Synthesis (12). Reporting of methods and results  
123 was developed in accordance with the PRISMA extension statement for scoping  
124 reviews (see Supplementary File 1 for the PRISMA reporting checklist. see  
125 Supplementary File 2 for inclusions/exclusion protocols.) (13).

### 127 **Information sources and literature search**

128 A comprehensive literature search was developed in consultation with an academic  
129 librarian that included published academic and grey literature sources, as well as hand  
130 searches of relevant journals. Initial literature searches were conducted in June 2021  
131 and were updated in August 2022. Databases searched included MEDLINE, Embase,  
132 PsycInfo, The Cochrane Library, and the JBI Evidence-based practice database  
133 (Supplementary File 3 – Table 1). Keyword searches were also carried out in selected  
134 websites, Google Scholar, Medrxiv, and Open Grey to identify grey literature including  
135 policy documents, organizational strategies, and unpublished academic literature  
136 (Supplementary File 3 – Table 2). Specialty journals focused on virtual/digital care  
137 including Journal of Medical Internet Research, Lancet Digital Health, and Nature Digital  
138 Medicine, were hand searched from 2015 to June 2022.

### 140 **Eligibility criteria**

141 The eligibility criteria were structured based on the “Population, Context, Concept”  
142 (PCC) research framework(12) as follows:

- 1  
2  
3 143 • *Population*: adults (over 18 years of age) receiving ambulatory/outpatient care  
4  
5 144 through healthcare organizations for chronic or acute/subacute conditions.  
6  
7  
8 145 • *Context*: participation in virtual care, defined as “any interaction between patients  
9  
10 146 and/or members of their circle of care, occurring remotely, using any forms of  
11  
12 147 communication or information technologies”(1)  
13  
14  
15 148 • *Concept*: within the Quintuple Aim framework (provider experience, patient  
16  
17 149 experience, per capita cost, population health, and health equity)(14), indicators are  
18  
19 150 based in the NAM’s quality framework (safety, effectiveness, patient-centeredness,  
20  
21 151 timeliness, efficiency and equity) and sustainability(15).

22  
23  
24 152 All modalities of virtual care were included such as video conferencing, remote  
25  
26 153 monitoring, and patient portals. Included papers must have addressed multiple domains  
27  
28 154 within the Quintuple Aim, or a domain with the Quintuple Aim and NAM quality  
29  
30 155 framework. Studies that focused on only one domain in a specific population were  
31  
32 156 excluded. Disease specific publications were only included if they focused on two or  
33  
34 157 more quality domains. Due to changes in technology and the rapid increase in virtual  
35  
36 158 care only studies published in English from 2015-2022 were included.  
37  
38  
39  
40  
41  
42

### 43 160 **Study selection process**

44  
45 161 The literature search results were uploaded into Covidence review manager and de-  
46  
47 162 duplicated prior to screening(16). Screening questions based on the eligibility criteria  
48  
49 163 (Supplementary File 2 – Figure 1) were developed for both title/abstract and full-text  
50  
51 164 screening and pilot tested with rounds of randomly selected citations until satisfactory  
52  
53 165 agreement (>75%) was reached between reviewers. Double screening of title/abstracts  
54  
55  
56  
57  
58  
59  
60

1  
2  
3 166 was conducted (by CL, PR, VK, and AS), followed by full text screening by a single  
4  
5 167 reviewer for a streamlined approach. Conflicts were resolved through group discussion  
6  
7 168 with the reviewers and confirmed by (GM). After full text screening, all excluded  
8  
9  
10 169 citations or articles were re-reviewed by an independent second reviewer (PR) to  
11  
12 170 ensure accuracy. A similar process was followed for the 2022 update with SP, PR and  
13  
14  
15 171 AS, as reviewers.  
16  
17 172

### 19 173 **Data collection and management**

21 174 Due to the large heterogeneity across the types of papers, and the lack of  
22  
23 175 standardization in reporting of quality indicators and domains, the team opted for a  
24  
25 176 rigorous approach with two reviewers (two of CL, PR, VK, SP, and AS) independently  
26  
27 177 extracting each article. Any discrepancies in extracted data were reviewed and resolved  
28  
29 178 by an independent third reviewer. A standardized data extraction form was developed to  
30  
31 179 summarize and record the reviewed studies within Covidence review manager.  
32  
33 180 Extraction was piloted in two rounds using 3 studies per round, and the extraction form  
34  
35 181 revised accordingly. Data items included publication characteristics (year of publication,  
36  
37 182 country, study design, funding source, and sample size), intervention details (care  
38  
39 183 setting, virtual care modality, primary condition/health concern), and details on reported  
40  
41 184 quality indicators (definition, measurement/scoring tools, etc.).  
42  
43  
44  
45  
46

### 49 186 **Data Synthesis**

51 187 Individual indicators were used to demonstrate the connections between virtual care  
52  
53 188 modalities and the Quintuple Aim (14); patient experience and provider experience were  
54  
55  
56  
57  
58  
59  
60

1  
2  
3 189 further sub-coded into the NAM quality domains (15) along with sustainability. These  
4  
5 190 connections were visualized through an alluvial (also known as Sankey) diagram.  
6  
7 191 Although these individual indicators will be further refined through a future Delphi  
8  
9 192 consensus process to narrow a subset of indicators across quality domains, the  
10  
11 193 proportions provide valuable information regarding the types of quality domains and  
12  
13 194 their corresponding modalities.  
14  
15  
16  
17  
18

### 19 196 **Risk of bias**

20  
21 197 As this was a scoping review intended to capture a collection of quality indicator items,  
22  
23 198 rather than evaluate their effectiveness or appropriateness, risk of bias was not  
24  
25 199 assessed based on current published guidelines (12).  
26  
27  
28  
29

### 30 201 **Patient and Public Involvement Statement**

31  
32 202 People with lived experience were involved in the conception and development of the  
33  
34 203 scoping review as well as the presentation and dissemination of results through the  
35  
36 204 Patient Experience Advisors program and the Community Liaison Advisory Council  
37  
38 205 (CLAC) at Women's College Hospital. We intend to solicit further patient participation as  
39  
40 206 well as general public involvement in future work developing a balanced scorecard  
41  
42 207 based on the literature identified in this review. Working with patients helped to ensure  
43  
44 208 quality indicators that were extracting from the literature were relevant to patient  
45  
46 209 concerns and provided guidance on the mapping of indicators to the Quintuple Aim and  
47  
48 210 NAM quality framework. Patient advisors also helped to identify gaps, including the lack  
49  
50  
51  
52  
53  
54  
55  
56  
57  
58  
59  
60

211 of focus on equity, and will further input to addressing these gaps through development  
212 of the scorecard.

213

## 214 **RESULTS**

215 The literature search resulted in a total of 18,395 citations from databases and grey  
216 literature searching that were imported into Covidence; no additional citations were  
217 identified through hand-searching journals. A total of 4,891 duplicate citations were  
218 removed leaving 13,504 citations for title and abstract screening. After title and abstract  
219 screening, 814 full-text articles were identified for retrieval and 183 reports, mostly  
220 conference abstracts and commentaries, were further excluded. After assessing the  
221 reports for eligibility, 66 articles were included for data extraction (Fig 1).

222

### 223 **Figure 1: PRISMA study flow diagram**

224

### 225 **Characteristics of Included Studies**

226 The included studies comprised 45 primary research studies (e.g., observational  
227 studies) and 21 secondary research articles (e.g., systematic reviews). Table 1  
228 summarizes the main characteristics of the included articles. The most frequent study  
229 designs were observational studies (n=32), followed by systematic reviews (n=11),  
230 qualitative studies (n=5), and interventional trials (n=5). The majority of included studies  
231 were published between 2018 and 2020 (n=25) in North America (n=29) or Europe  
232 (n=22). Funding sources were mainly from public institutions (n=30), but a large  
233 proportion of studies also reported no external funding for their study (n=24).

234

235 **Table 1: Characteristics of included studies (n=66)**

|                                             | <b>Primary Studies<br/>(n=45)<br/>[n (%)]</b> | <b>Secondary<br/>Studies (n=21)<br/>[n (%)]</b> |
|---------------------------------------------|-----------------------------------------------|-------------------------------------------------|
| <b>Year of Publication</b>                  |                                               |                                                 |
| 2015-2017                                   | 13 (29)                                       | 7 (33)                                          |
| 2018-2020                                   | 18 (40)                                       | 7 (33)                                          |
| 2021-2022                                   | 14 (31)                                       | 7 (33)                                          |
| <b>Country of Publication</b>               |                                               |                                                 |
| Asia                                        | 1 (2)                                         | 3 (14)                                          |
| Australia/South Pacific                     | 4 (9)                                         | 2 (10)                                          |
| Europe                                      | 14 (31)                                       | 7 (33)                                          |
| North Africa and Middle East                | 4 (9)                                         | 1 (5)                                           |
| North America                               | 21 (47)                                       | 8 (38)                                          |
| South America                               | 1 (2)                                         | --                                              |
| <b>Study Design</b>                         |                                               |                                                 |
| Case report/series                          | 1 (2)                                         | --                                              |
| Observational (cross-sectional, cohort)     | 30 (67)                                       | --                                              |
| Qualitative study                           | 5 (11)                                        | --                                              |
| Mixed methods                               | 3 (7)                                         | --                                              |
| Interventional (pre/post, controlled trial) | 5 (11)                                        | --                                              |
| Cost/Cost-Effectiveness                     | 1 (2)                                         | --                                              |
| Systematic Review                           | --                                            | 11 (53)                                         |
| Scoping/Umbrella Review                     | --                                            | 4 (19)                                          |
| Integrative Review                          | --                                            | 3 (14)                                          |
| Environmental Scan                          | --                                            | 3 (14)                                          |
| <b>Funding Source</b>                       |                                               |                                                 |
| Private                                     | 1 (2)                                         | 2 (10)                                          |
| Public                                      | 22 (49)                                       | 8 (38)                                          |
| Mixed                                       | 2 (5)                                         | --                                              |
| None                                        | 14 (31)                                       | 9 (42)                                          |
| Not Reported                                | 6 (13)                                        | 2 (10)                                          |
| <b>Number of participants</b>               |                                               |                                                 |



|                                                   |                            |             |
|---------------------------------------------------|----------------------------|-------------|
| Patients/Caregivers [median (IQR)]                | 115 (42-265)               | --          |
| Healthcare Providers [median (IQR)]               | 18 (13, 22)                | --          |
| <b>Participant Age</b>                            |                            |             |
| Patients/Caregivers [median (IQR)]                | 55.5 (47, 63)              | --          |
| Healthcare Providers [range]                      | 22-76                      | --          |
| <b>Participant Gender (%)</b>                     |                            |             |
| Patients/Caregivers [median]                      | Female: 53.7<br>Male: 50   | --          |
| Healthcare Providers [median]                     | Female: 61.3<br>Male: 38.7 | --          |
| <b>Review Methods</b>                             |                            |             |
| Number of included publications<br>[median (IQR)] | --                         | 17 (12, 22) |
| Reported inclusion/exclusion criteria             | --                         | 16 (76)     |
| Limited search by language                        | --                         | 10 (48)     |
| Limited search by date                            | --                         | 5 (24)      |
| <b>Age/publication date of included studies</b>   |                            |             |
| 0-5 years prior                                   | --                         | 3 (14)      |
| 6-10 years prior                                  | --                         | 4 (19)      |
| 11+ years prior                                   | --                         | 9 (43)      |
| Not reported                                      | --                         | 5 (24)      |

236

237 Interventions examined in the included studies covered a range of virtual care

238 modalities (Table 2) including video and audio visits with clinicians (n=44), remote

239 monitoring programs (n=13), mobile applications (n=12), self-monitoring and wearable

240 devices (n=9), synchronous or asynchronous messaging with healthcare providers

241 (n=13), or patient portals (n=10). Care settings (Table 2) ranged from ambulatory and

242 outpatient clinics (n=41) to primary care (n=13), and home and community care settings

243 (n=8). Patient populations (Table 2) included individuals with chronic noncommunicable

244 conditions (n=19), cancer (n=7), and mental health conditions (n=5).

245

246 **Table 2: Summary of intervention and setting characteristics (n=66)**

|                                                                                        | <b>Value<br/>[n (%)]</b> |
|----------------------------------------------------------------------------------------|--------------------------|
| <b>Primary Condition/Health Concern</b>                                                |                          |
| Cancer                                                                                 | 7 (11)                   |
| Cardiac conditions                                                                     | 3 (5)                    |
| Chronic pain/Musculoskeletal                                                           | 3 (5)                    |
| Dermatologic conditions                                                                | 4 (6)                    |
| Diabetes                                                                               | 5 (8)                    |
| Kidney disease                                                                         | 3 (5)                    |
| Mental Health                                                                          | 5 (8)                    |
| Palliative                                                                             | 3 (5)                    |
| Specialist Clinic*                                                                     | 8 (12)                   |
| Surgery - unspecified                                                                  | 3 (5)                    |
| Multiple conditions                                                                    | 11 (17)                  |
| Not applicable/unspecified                                                             | 11 (17)                  |
| <b>Setting/Context of care delivery</b>                                                |                          |
| Ambulatory care/outpatient clinic                                                      | 40 (60)                  |
| Primary care                                                                           | 13 (20)                  |
| Home and Community care                                                                | 7 (11)                   |
| Not applicable/not specified                                                           | 6 (9)                    |
| <b>Type of Virtual Care Modality**</b>                                                 |                          |
| Virtual visit/telemedicine – video                                                     | 43 (65)                  |
| Virtual visit/telemedicine – audio only                                                | 37 (56)                  |
| Remote monitoring                                                                      | 11 (17)                  |
| Mobile application                                                                     | 11 (17)                  |
| Self-monitoring/Wearables                                                              | 8 (12)                   |
| Synchronous messaging                                                                  | 4 (6)                    |
| Asynchronous messaging                                                                 | 9 (14)                   |
| Patient Portals                                                                        | 10 (15)                  |
| Other/Not specified                                                                    | 7 (11)                   |
| <b>Number of Interventions</b>                                                         |                          |
| 1 or 2                                                                                 | 46 (70)                  |
| 3 or 4                                                                                 | 17 (25)                  |
| 5 to 7                                                                                 | 3 (5)                    |
| *medical specialties include ENT, Gastroenterology, Neurology, Gynecology, and Urology |                          |
| **percentage totals exceed 100 as studies included multiple modalities                 |                          |

247

248 Connections between virtual care modalities within the Quintuple Aim framework and

249 NAM quality domains are visualized in Figure 2. Within the Quintuple Aim, the most

250 reported category related to patient experience (n=200 indicators), followed by provider  
 251 experience (n=52), population health outcomes (n=47), health system costs (n=22), and  
 252 equity (n=7). Virtual visits by phone and/or video (n=96) were the most common  
 253 modality of virtual care reported, and was strongly connected to patient experience,  
 254 provider experience, and population health outcomes (Fig 2). Virtual visits (video only)  
 255 (n=60) and remote monitoring (n=59) were the next most common, also connecting  
 256 strongly to patient experience, provider experience, and population health outcomes.

257  
 258 Within the NAM quality domains, the most common sub-coded domains included patient  
 259 centeredness (n=66), effectiveness (n=64), sustainability (n=36), and efficiency of care  
 260 (n=36) (Fig 2). Details regarding the frequency of indicators for NAM domains and  
 261 patient experience and provider experience are provided in Supplementary File 4, with  
 262 examples of indicators and their stem groupings in Table 3.

263  
 264 **Figure 2: Alluvial diagram connecting virtual care modalities to the Quintuple Aim**  
 265 **and quality domains.** Through the middle are the Quintuple Aim domains, with curved  
 266 bars representing connection to the virtual care modality (left) and NAM quality domains  
 267 (right). For example, the 59 mentions of remote monitoring (left) were mostly connected  
 268 with patient experience, followed by population health outcomes, then provider  
 269 experience. The thick vertical bars show the frequency compared to the other domains:  
 270 virtual visits were the most common modality; patient experience was the most common  
 271 Quintuple Aim domain; and patient-centredness was the most common NAM quality  
 272 domain.

273  
 274 **Table 3: Examples of indicator-stem groupings and indicators within the**  
 275 **Quintuple Aim, specific to virtual care.**

| Examples of Indicator-Stem Grouping | Examples of Individual Indicators | Examples of Indicator Measurement |
|-------------------------------------|-----------------------------------|-----------------------------------|
|-------------------------------------|-----------------------------------|-----------------------------------|

| <b>(NAM Quality Domain)</b>                                                                      |                                                                                                            |                                                                                                                                                                                                                                                                                                                                                                                           |
|--------------------------------------------------------------------------------------------------|------------------------------------------------------------------------------------------------------------|-------------------------------------------------------------------------------------------------------------------------------------------------------------------------------------------------------------------------------------------------------------------------------------------------------------------------------------------------------------------------------------------|
| <b>Quintuple Aim domain: Patient Experience</b>                                                  |                                                                                                            |                                                                                                                                                                                                                                                                                                                                                                                           |
| Patient satisfaction<br>( <i>Patient centeredness</i> )<br><br>Usability<br>( <i>Efficient</i> ) | Patient satisfaction of virtual care compared to in-person consultations                                   | 5-point Likert scale – proportion of positive responses:<br>“The clinical care I received during a virtual visit was the same as a face-to-face visit.”<br><br>Telemedicine usability questionnaire: 18 items, 7-point Likert scale; higher mean score indicates higher satisfaction (usefulness, ease, interface quality, interaction quality, satisfaction and future use, reliability) |
| Effectiveness                                                                                    | Patient-perceived value of the virtual consultation.                                                       | Net promoter score – “recommend virtual visit to a friend”<br><br>Virtual visits are more convenient than an office visit                                                                                                                                                                                                                                                                 |
| Access to care<br>( <i>Equitable</i> )                                                           | Ease of navigating access to a video appointment.<br><br>Support to patients to overcome technical issues. | Proportion of patients requiring help with equipment<br><br>Proportion of patients having trouble logging on to platform                                                                                                                                                                                                                                                                  |
| <b>Quintuple Aim domain: Provider Experience</b>                                                 |                                                                                                            |                                                                                                                                                                                                                                                                                                                                                                                           |
| Provider satisfaction and preference                                                             | Provider satisfaction compared to in-person consultations.                                                 | 5-item questionnaire using 0-100 Visual Analog Scales – overall score calculated by averaging responses                                                                                                                                                                                                                                                                                   |
| Infrastructure/organizational capacity<br>( <i>Sustainable</i> )                                 | Perceptions of effectiveness.                                                                              | Telehealth Usability Questionnaire                                                                                                                                                                                                                                                                                                                                                        |
| Provider-patient workload/workflow<br>( <i>Timely, efficiency</i> )                              | Provider and clinic efficiency.                                                                            | Reduction in ‘no-shows’ and cancelled appointments<br><br>Decrease in wait times for patients                                                                                                                                                                                                                                                                                             |
| Physician perspective of effectiveness<br>( <i>Effective</i> )                                   | Ability to evaluate/examine patient.                                                                       | Likert scales – proportion of physicians that agree:<br>I was confident with my ability to diagnose/make recommendations.<br>I was able to effectively inform my patient.                                                                                                                                                                                                                 |

| <b>Quintuple Aim domain: Population Health &amp; Outcomes</b>       |                                               |                                                                             |
|---------------------------------------------------------------------|-----------------------------------------------|-----------------------------------------------------------------------------|
| Follow-up Care                                                      | 30- or 90-day outpatient follow-up.           | Number or proportion of patients seen in follow-up after virtual visit      |
|                                                                     | Emergency Department use after virtual visit. | Number or proportion of patients seeking emergency care after virtual visit |
| Access to Care                                                      | Program usage.                                | Proportion of participants engaging with the platform/completing program    |
| Clinical outcomes and measures                                      | Clinical effectiveness of care.               | Changes in clinical outcomes/disease markers                                |
|                                                                     | Quality of life.                              | Changes in QoL as measured by validated scales: EQ-5D*, WHO-QL**            |
|                                                                     | Patient safety.                               | Incidence of adverse clinical events                                        |
| <b>Quintuple Aim domain: Cost</b>                                   |                                               |                                                                             |
| Health system costs                                                 | Cost reduction.                               | Cost of standard visit compared to virtual visit                            |
|                                                                     | Cost-effectiveness.                           | Cost of telemedicine implementation and maintenance                         |
| Patient Costs                                                       | Cost-avoidance.                               | Patient travel savings compared to in-office visits                         |
| <b>Quintuple Aim domain: Equity</b>                                 |                                               |                                                                             |
| Accessibility                                                       | Equal access to care.                         | Availability of appropriate connectivity/ technical services in rural areas |
| Financial impact                                                    | Time saved by the patient                     | Reduction in travel time                                                    |
| *EQ-5D: EuroQol-5 Dimensions – health-related quality of life scale |                                               |                                                                             |
| **WHO-QL: World Health Organization-Quality of Life scale           |                                               |                                                                             |

276

277

### 278 **Specific Instruments Measuring Quality**

279 Throughout data extraction, several existing tools were mentioned for measuring quality  
 280 of care. For patient experience, tools included Telemedicine/Telehealth usability  
 281 questionnaires (n=18 studies); Telemedicine Satisfaction and Usefulness Questionnaire  
 282 (n=3); and Service User Technology Acceptability Questionnaire (n=1). For provider

1  
2  
3 283 experience the Telemedicine/Telehealth Usability Questionnaire (n=2) was used, while  
4  
5 284 others only mention 5- and 10-point Likert scales with unique or custom question  
6  
7 285 prompts. No specific measurement tools were mentioned for population health  
8  
9 286 outcomes, costs, or health equity.  
10  
11  
12 287

## 14 288 **DISCUSSION**

16  
17 289 This scoping review on quality measures for ambulatory virtual care found that within  
18  
19 290 the Quintuple Aim, the most reported category assessing quality of virtual care was  
20  
21 291 related to patient experience, followed by provider experience, and population health  
22  
23 292 outcomes. There was limited mention of health system costs, patient costs, or equity.  
24  
25

26 293 The most frequently mentioned virtual care modality was virtual visits in video and/or  
27  
28 294 audio, followed by video visits only, remote monitoring programs, mobile applications,  
29  
30 295 and self-monitoring tools. Within the NAM domains of quality for patient and provider  
31  
32 296 experience, effectiveness was most common, followed by patient centeredness and  
33  
34 297 efficiency, with limited mention of sustainability.  
35  
36  
37

38 298  
39  
40 299 Best practice guidelines for virtual care are required to realize integration of virtual care  
41  
42 300 across health systems (17,18). This review provides the foundation for identification and  
43  
44 301 refinement of quality indicators in virtual care and highlights current gaps in assessment  
45  
46 302 of virtual care performance indicators. Results indicate that further development of  
47  
48 303 evaluation methods specifically analyzing the equitable and cost-efficient deployment of  
49  
50 304 virtual care are needed. Measurement of quality of virtual care will support  
51  
52  
53  
54  
55  
56  
57  
58  
59  
60

1  
2  
3 305 understanding performance gaps, and targets for future quality improvement efforts and  
4  
5 306 benchmarking efforts across organizations.  
6

7  
8 307

9  
10 308 **Limited Attention on Equity, Sustainability, and Cost**

11  
12 309 It was noted that the majority of quality indicators were concentrated in specific domains  
13  
14 310 such as patient experience and/or satisfaction, or provider experience and/or  
15  
16 311 satisfaction, while the more complex indicators, such as equity, cost, and sustainability,  
17  
18 312 were not as widely reported. The limited attention on equity is consistent with published  
19  
20 313 literature, such as the scoping review of reviews which highlights the lack of focus on  
21  
22 314 equity assessments in virtual care deployments (19). Equity may have been more  
23  
24 315 challenging to measure and integrate into program evaluation and may have been  
25  
26 316 considered outside the scope of QI projects or time-sensitive deployments (such as  
27  
28 317 during the COVID-19 pandemic) (20). This lack of consideration of equity is concerning,  
29  
30 318 as virtual care has the potential to improve access to care for some typically  
31  
32 319 underserved populations and worsen access for others (21), making it an essential  
33  
34 320 consideration in understanding quality of care.  
35  
36  
37  
38  
39

40 321

41  
42 322 Our review also noted limited attention in evaluations around sustainability of virtual  
43  
44 323 care delivery. Sustainability maybe considered from multiple perspectives, including if  
45  
46 324 the patient plans to continue to use the virtual options, or if the organization has the  
47  
48 325 means (infrastructure, IT support etc.) to continue to deliver virtual care after the COVID-  
49  
50 326 19 pandemic restrictions lessened. Further indicators are needed to monitor the  
51  
52 327 continued need for and use of virtual care to assess if it remains a preferred and  
53  
54  
55  
56  
57  
58  
59  
60

1  
2  
3 328 feasible option, especially within hybrid models of care delivery which includes both  
4  
5 329 virtual and in person options. Considering sustainability is also important while taking a  
6  
7 330 Learning Health Systems (LHS) approach across healthcare organizations and systems  
8  
9 331 where the focus is on continuous learning and iterative advancement (22). Sustainability  
10  
11 332 needs to be a key part of this systems-based approach, and thus quality indicators of  
12  
13 333 virtual care that consider sustainability are needed.  
14  
15  
16  
17 334

18  
19 335 Indicators within the Quintuple Aim domain of cost were also rarely reported in the  
20  
21 336 literature, for either patient costs or health system costs (This limited inclusion may  
22  
23 337 partly be as cost can be difficult to measure and quantify in rapid virtual care  
24  
25 338 deployments. This finding is consistent with a 2020 scoping review which analyzed the  
26  
27 339 cost-effectiveness of telehealth to the healthcare system, which also highlighted this  
28  
29 340 gap (23). Cost needs to be considered as part of evaluation of quality of virtual care,  
30  
31 341 including in connection with sustainability of the service and the cost implications for  
32  
33 342 patients, which also ties back to the topic of health equity and access to virtual care.  
34  
35  
36  
37  
38  
39

#### 40 344 **Evidence Synthesis of Virtual Care**

41  
42 345 There has been a considerable amount of work published about virtual care, and  
43  
44 346 extensive synthesis of that work. About a third of literature included in this scoping  
45  
46 347 review were reviews themselves, however, these reviews usually were limited and  
47  
48 348 focused on a specific service or modality of virtual care such as patient portals (24),  
49  
50 349 telehealth/phone visits (25,26) and video consultations (27,28). Few reviews assessed  
51  
52 350 approaches or models for evaluating virtual care, or tools which specifically measured  
53  
54  
55  
56  
57  
58  
59  
60



1  
2  
3 351 quality across multiple domains as identified by the Quintuple Aim and NAM  
4  
5 352 frameworks. To the authors' knowledge, this is the first review which specifically  
6  
7 353 evaluates quality in virtual care with a comprehensive approach in defining quality  
8  
9 354 indicators and assessing their use against established quality frameworks.  
10  
11 355 A report by the Canadian Agency for Drugs and Technology in Health (CADTH) which  
12  
13 356 studied evaluations of virtual care was consistent with our findings (29). The CADTH  
14  
15 357 report stated that evaluations should focus on ensuring the scope of the virtual care  
16  
17 358 visits was appropriate for the care being administered, be conducted systematically, and  
18  
19 359 that cost-analysis or cost-benefit evaluations be conducted with a specific viewpoint in  
20  
21 360 mind – such as a patient or provider (29). The findings of this scoping review support  
22  
23 361 these assertions from a quality perspective. A quality virtual care program is clear in its  
24  
25 362 scope, has dedicated resources for ongoing evaluations, and specifically investigates  
26  
27 363 the impact of the program from the patient perspective, provider perspective, or both.  
28  
29  
30  
31  
32

33 364

### 35 365 **Leveraging Review Results: Next Steps**

36  
37 366 This review provides the foundational knowledge base of existing quality indicators of  
38  
39 367 virtual care across domains of quality and organized within established quality  
40  
41 368 frameworks. This knowledge base will be further refined and distilled through a modified  
42  
43 369 Delphi approach with key knowledge users and decision makers, including patients,  
44  
45 370 healthcare professionals, virtual care experts, and policymakers, to help add indicators  
46  
47 371 to address gaps, and rate and rank existing indicators based on feasibility, relevance,  
48  
49 372 and utility.  
50  
51  
52  
53  
54  
55  
56  
57  
58  
59  
60

1  
2  
3 373 A subset of high-ranked indicators across quality domains will then be translated into a  
4  
5 374 balanced score card for evaluating the quality of virtual care.  
6  
7

8 375  
9  
10  
11 376 An understanding of how to define quality in virtual care and measure performance is  
12  
13 377 key to the development and growth of a potential LHS, which aims to enable cycles of  
14  
15 378 continuous learning and improvement to be routinised and embedded across the  
16  
17 379 healthcare system (30). A LHS is the combination of a health system and research  
18  
19 380 system that, at all levels, is anchored on patient's needs, perspectives, and aspirations;  
20  
21 381 driven by timely data and evidence; supported by appropriate decision supports, aligned  
22  
23 382 governance, financial and care delivery arrangements; and enabled with a culture of,  
24  
25 383 and competencies for, rapid learning and improvement (31). Further, it is a system in  
26  
27 384 which science, informatics, incentives, and culture are aligned for continuous  
28  
29 385 improvement and innovation, and thus our domains of quality for virtual care can be  
30  
31 386 integrated into this approach. Ideally, best practices, including best practices in virtual  
32  
33 387 care, are seamlessly embedded in the delivery process, patients and families are active  
34  
35 388 participants in all elements, and new knowledge capture is an integral by-product of  
36  
37 389 delivery experience (30). Ultimately, the deployment of virtual care should follow an LHS  
38  
39 390 approach, with consistent revision and adjustment of virtual care initiatives to reflect  
40  
41 391 dynamic contexts and adapt based on new evidence. Mapping the current knowledge  
42  
43 392 base aims to provide organizations quick references for improving and iterating their  
44  
45 393 virtual care program. Working towards true integration of virtual care into a LHS is  
46  
47 394 subject to further research and implementation.  
48  
49  
50  
51  
52  
53  
54  
55  
56 395  
57  
58  
59  
60

## 396 **Strengths and Limitations**

397 This scoping review used a wide range of published and grey sources, covered a vast  
398 breadth of literature, and applied rigorous methods for data extraction and coding. The  
399 body of literature included in this review also represents the current state of publications  
400 on virtual care, as the search was updated as the project progressed. However, our  
401 search strategy was limited to English only, and relying on the past seven years meant  
402 that foundational work on the implementation of virtual care may have been excluded.  
403 A key strength of this work was our categorization of existing indicators across  
404 established quality frameworks (NAM and sustainability, Quintuple Aim) to identify  
405 which quality domains of virtual care are present and lacking within the current  
406 literature. However, there is considerable overlap between the NAM domains for  
407 categorization, and extensive differences in the way indicators were explained in the  
408 published studies, typically with very little detail. Indicators could overlap and routinely fit  
409 within more than one quality domain, and the lack of detail provided about each  
410 indicator meant that some assumptions were made, leading to subjectivity with current  
411 results. For example, patient-centered care was used very differently across studies,  
412 with some having it synonymous with patient satisfaction, while others acknowledged  
413 the multiple factors and complexity in delivery patient-centered care. To address this  
414 limitation we dual-coded all indicators, resolved discrepancy with a third reviewer and  
415 will be working with interprofessional decision makers and persons with lived  
416 experience as we develop the balanced scorecard. The lack of reporting on how  
417 indicators were selected when measuring quality of care, the lack of detail provided, and  
418 the lack of reported knowledge user (patient, provider, management etc.) involvement,

1  
2  
3 419 further highlighted the need for a consensus-based approach to finalize a concise list of  
4  
5 420 virtual care quality indicators across all quality domains.  
6  
7

8 421

9  
10 422 **CONCLUSION**

11  
12 423 To ensure delivery of high quality virtual care, it is imperative to understand what is  
13  
14 424 “quality” in virtual care. By identifying and mapping indicators of quality of virtual care to  
15  
16 425 the Quintuple Aim and the NAM framework, we aim to deepen our understanding of  
17  
18 426 these indicators and identify gaps. The most reported category assessing quality of  
19  
20 427 virtual care was related to patient experience, followed by provider experience, and  
21  
22 428 population health outcomes. There was limited mention of health system costs, patient  
23  
24 429 costs, or equity, which limits our understanding of quality of virtual care initiatives, these  
25  
26 430 gaps highlight the need for development of new indicators, and a consensus-based  
27  
28 431 process with knowledge users to create a prioritized list. Future work will add and  
29  
30 432 further refine the quality indicators through a modified Delphi approach, with the aim to  
31  
32 433 provide decision-makers with a balanced scorecard for the implementation of quality  
33  
34 434 virtual care initiatives moving forward.  
35  
36  
37  
38  
39

40 435

41  
42 436  
43  
44  
45  
46  
47  
48  
49  
50  
51  
52  
53  
54  
55  
56  
57  
58  
59  
60

1  
2  
3 437 **Author Contributions**  
4

5 438 Conceptualization: Geetha Mukerji  
6

7  
8 439 Formal Analysis: Sam Petrie, Celia Laur, Patricia Rios  
9

10 440 Funding Acquisition: Geetha Mukerji  
11

12 441 Investigation: Sam Petrie, Celia Laur, Toni Makanjoula, Patricia Rios, Geetha Mukerji,  
13  
14 442 Ally Suarez  
15

16  
17 443 Writing – Original Draft Preparation: Sam Petrie, Celia Laur  
18

19 444 Writing – Reviewing & Editing: Celia Laur, Patricia Rios, Ally Suarez, Toni Makanjoula,  
20  
21 445 Geetha Mukerji, Onil Bhattacharyya, Emeraldalda Burke  
22  
23

24 446  
25

26 447 **Acknowledgements**  
27

28 448 We would like to thank Vanessa Kishimoto for assistance with title and abstract  
29  
30 449 screening and Becky Skidmore for assistance with developing the literature search.  
31  
32

33 450  
34

35 451 **CONFLICT OF INTEREST**  
36

37 452 The authors have no conflict of interest to declare.  
38  
39

40 453  
41

42 454 **FUNDING**  
43

44 455 This study was supported by a grant from the Innovation Fund of the Alternative  
45  
46 456 Funding Plan for the Academic Health Sciences Centres of Ontario. Funding grant  
47  
48 457 number: WCH-22-004.  
49  
50  
51  
52  
53  
54  
55  
56  
57  
58  
59  
60

1  
2  
3 458 **DATA AVAILABILITY STATEMENT**  
4

5 459 No additional data available.  
6  
7 460  
8  
9 461  
10  
11 462  
12  
13 463  
14  
15 464  
16  
17 465  
18  
19 466  
20  
21 467  
22  
23 468  
24  
25 469  
26  
27 470  
28  
29 471  
30  
31 472  
32  
33 473  
34  
35 474  
36  
37 475  
38  
39 476  
40  
41 477  
42  
43 478  
44  
45 479  
46  
47 480  
48  
49 481  
50  
51 482  
52  
53 483  
54  
55 484  
56  
57  
58  
59  
60

485 **REFERENCES**

- 486 1. Jamieson T, Wallace R, Armstrong K, Agarwal P, Griffin B, Wong I, et al. Virtual  
487 Care: A Framework for a Patient-Centric System [Internet]. Women's College  
488 Hospital Institute for Health Systems Solutions and Virtual Care; 2015 Jun p. 121.  
489 Available from:  
490 [https://www.womenscollegehospital.ca/assets/pdf/wihv/WIHV\\_VirtualHealthSymposium.pdf](https://www.womenscollegehospital.ca/assets/pdf/wihv/WIHV_VirtualHealthSymposium.pdf)  
491
- 492 2. Bhatia RS, Chu C, Pang A, Tadrous M, Stamenova V, Cram P. Virtual care use  
493 before and during the COVID-19 pandemic: a repeated cross-sectional study. *CMAJ*  
494 *Open*. 2021;9(1):E107–14.
- 495 3. Canadian Medical Association, Abacus Data. What Canadians Think about Virtual  
496 Health Care [Internet]. 2020 May. Available from: [https://abacusdata.ca/wp-](https://abacusdata.ca/wp-content/uploads/2020/06/CMA-Abacus-May-2020-Jun-4-ENv2.pdf)  
497 [content/uploads/2020/06/CMA-Abacus-May-2020-Jun-4-ENv2.pdf](https://abacusdata.ca/wp-content/uploads/2020/06/CMA-Abacus-May-2020-Jun-4-ENv2.pdf)
- 498 4. Ashcroft R, Ryan B, Mehta K, Brown J, Lam S, Dolovich L, et al. “Healthcare at its  
499 finest”: Patient perspectives on virtual care appointments in primary care. In: COVID-  
500 19 [Internet]. American Academy of Family Physicians; 2022 [cited 2023 May 5]. p.  
501 2944. Available from: <http://www.annfammed.org/lookup/doi/10.1370/afm.20.s1.2944>
- 502 5. Abrams K, Burrill S, Elsner N. What can health systems do to encourage physicians  
503 to embrace virtual care? [Internet]. Deloitte Center for Health Solutions; 2018 p. 24.  
504 Available from:  
505 [https://www2.deloitte.com/content/dam/insights/us/articles/4407\\_Virtual-care-](https://www2.deloitte.com/content/dam/insights/us/articles/4407_Virtual-care-survey/DI_Virtual-care-survey.pdf)  
506 [survey/DI\\_Virtual-care-survey.pdf](https://www2.deloitte.com/content/dam/insights/us/articles/4407_Virtual-care-survey/DI_Virtual-care-survey.pdf)
- 507 6. Government of Canada. Pan-Canadian virtual care priorities in response to COVID-  
508 19 [Internet]. 2021. Available from: [https://www.canada.ca/en/health-](https://www.canada.ca/en/health-canada/corporate/transparency/health-agreements/bilateral-agreement-pan-canadian-virtual-care-priorities-covid-19.html)  
509 [canada/corporate/transparency/health-agreements/bilateral-agreement-pan-](https://www.canada.ca/en/health-canada/corporate/transparency/health-agreements/bilateral-agreement-pan-canadian-virtual-care-priorities-covid-19.html)  
510 [canadian-virtual-care-priorities-covid-19.html](https://www.canada.ca/en/health-canada/corporate/transparency/health-agreements/bilateral-agreement-pan-canadian-virtual-care-priorities-covid-19.html)
- 511 7. Agency for Healthcare Research and Quality. Quality Indicator Measures [Internet].  
512 Available from: [https://qualityindicators.ahrq.gov/measures/qi\\_resources](https://qualityindicators.ahrq.gov/measures/qi_resources)
- 513 8. Canadian Institute for Health Information. What is an Indicator? [Internet]. Available  
514 from: [https://www.cihi.ca/en/access-data-and-reports/health-system-performance-](https://www.cihi.ca/en/access-data-and-reports/health-system-performance-measurement/what-is-an-indicator)  
515 [measurement/what-is-an-indicator](https://www.cihi.ca/en/access-data-and-reports/health-system-performance-measurement/what-is-an-indicator)
- 516 9. Pflugeisen BM, Mou J. Patient Satisfaction with Virtual Obstetric Care. *Matern Child*  
517 *Health J*. 2017 Jul;21(7):1544–51.
- 518 10. Saiyed S, Nguyen A, Singh R. Physician Perspective and Key Satisfaction  
519 Indicators with Rapid Telehealth Adoption During the Coronavirus Disease 2019  
520 Pandemic. *Telemed J E-Health Off J Am Telemed Assoc*. 2021 Nov;27(11):1225–34.

- 1  
2  
3 521 11. Parmanto B, Lewis ANJ, Graham KM, Bertolet MH. Development of the  
4 522 Telehealth Usability Questionnaire (TUQ). *Int J Telerehabilitation*. 2016;8(1):3–10.
- 5  
6 523 12. Aromataris E, Munn Z, editors. *JBI Manual for Evidence Synthesis* [Internet]. JBI;  
7 524 2020 [cited 2023 May 5]. Available from: [https://jbi-global-](https://jbi-global-wiki.refined.site/space/MANUAL)  
8 525 [wiki.refined.site/space/MANUAL](https://jbi-global-wiki.refined.site/space/MANUAL)
- 9  
10  
11 526 13. Tricco AC, Lillie E, Zarin W, O'Brien KK, Colquhoun H, Levac D, et al. PRISMA  
12 527 Extension for Scoping Reviews (PRISMA-ScR): Checklist and Explanation. *Ann*  
13 528 *Intern Med*. 2018 Oct 2;169(7):467–73.
- 14  
15 529 14. Nundy S, Cooper LA, Mate KS. The Quintuple Aim for Health Care Improvement:  
16 530 A New Imperative to Advance Health Equity. *JAMA*. 2022 Feb 8;327(6):521–2.
- 17  
18 531 15. Institute of Medicine (U.S.), editor. *Crossing the quality chasm: a new health*  
19 532 *system for the 21st century*. Washington, D.C: National Academy Press; 2001. 337 p.
- 20  
21  
22 533 16. Covidence systematic review software [Internet]. Melbourne, Australia: Veritas  
23 534 Health Innovation; Available from: [covidence.org](https://www.covidence.org)
- 24  
25 535 17. Petrie S, Carson D, Peters P, Hurtig AK, LeBlanc M, Simpson H, et al. What a  
26 536 Pandemic Has Taught Us About the Potential for Innovation in Rural Health:  
27 537 Commencing an Ethnography in Canada, the United States, Sweden, and Australia.  
28 538 *Front Public Health*. 2021;9:1836.
- 29  
30  
31 539 18. Enhancing equitable access to virtual care in Canada: Principle-based  
32 540 recommendations for equity [Internet]. 2021. Available from:  
33 541 <https://policybase.cma.ca/link/policy14447>
- 34  
35 542 19. Budhwani S, Fujioka J, Thomas-Jacques T, De Vera K, Challa P, De Silva R, et  
36 543 al. Challenges and strategies for promoting health equity in virtual care: findings and  
37 544 policy directions from a scoping review of reviews. *J Am Med Inform Assoc JAMIA*.  
38 545 2022 Apr 13;29(5):990–9.
- 39  
40  
41 546 20. Crawford A, Serhal E. Digital Health Equity and COVID-19: The Innovation Curve  
42 547 Cannot Reinforce the Social Gradient of Health. *J Med Internet Res*. 2020 Jun  
43 548 2;22(6):e19361.
- 44  
45 549 21. Saeed SA, Masters RM. Disparities in Health Care and the Digital Divide. *Curr*  
46 550 *Psychiatry Rep*. 2021 Jul 23;23(9):61.
- 47  
48  
49 551 22. Shaw J, Brewer LC, Veinot T. Recommendations for Health Equity and Virtual  
50 552 Care Arising From the COVID-19 Pandemic: Narrative Review. *JMIR Form Res*.  
51 553 2021 Apr 5;5(4):e23233.
- 52  
53 554 23. Snoswell CL, Taylor ML, Comans TA, Smith AC, Gray LC, Caffery LJ.  
54 555 Determining if Telehealth Can Reduce Health System Costs: Scoping Review. *J Med*  
55 556 *Internet Res*. 2020 Oct 19;22(10):e17298.



- 1  
2  
3 557 24. Mold F, de Lusignan S, Sheikh A, Majeed A, Wyatt JC, Quinn T, et al. Patients'  
4 558 online access to their electronic health records and linked online services: a  
5 559 systematic review in primary care. *Br J Gen Pract J R Coll Gen Pract*. 2015  
6 560 Mar;65(632):e141-151.
- 7  
8  
9 561 25. Haroon S, Voo TC, Chua H, Tan GL, Lau T. Telemedicine and Haemodialysis  
10 562 Care during the COVID-19 Pandemic: An Integrative Review of Patient Safety,  
11 563 Healthcare Quality, Ethics and the Legal Considerations in Singapore Practice. *Int J*  
12 564 *Environ Res Public Health*. 2022;19(9).
- 13  
14 565 26. Allen Watts K, Malone E, Dionne-Odom JN, McCammon S, Currie E, Hicks J, et  
15 566 al. Can you hear me now?: Improving palliative care access through telehealth. *Res*  
16 567 *Nurs Health*. 2021;44(1):226–37.
- 17  
18  
19 568 27. Andrees V, Klein TM, Augustin M, Otten M. Live interactive teledermatology  
20 569 compared to in-person care - a systematic review. *J Eur Acad Dermatol Venereol*  
21 570 *JEADV*. 2020 Apr;34(4):733–45.
- 22  
23 571 28. Barsom EZ, van Hees E, Bemelman WA, Schijven MP. Measuring patient  
24 572 satisfaction with video consultation: a systematic review of assessment tools and  
25 573 their measurement properties. *Int J Technol Assess Health Care*. 2020 Jun 23;1–7.
- 26  
27  
28 574 29. Hui D, Dolcine B, Loshak H. Approaches to Evaluations of Virtual Care in  
29 575 Primary Care. *Can J Health Technol*. 2022 Jan 12;2(1):es0358.
- 30  
31 576 30. Best Care at Lower Cost: The Path to Continuously Learning Health Care in  
32 577 America [Internet]. Washington, D.C.: National Academies Press; 2013 [cited 2023  
33 578 May 5]. Available from: <http://www.nap.edu/catalog/13444>
- 34  
35 579 31. Lavis JN, Gauvin FP, Mattison CA, Moat KA, Waddell K, Wilson MG, et al. Rapid  
36 580 synthesis: Creating rapid-learning health systems in Canada [Internet]. Hamilton,  
37 581 Canada: McMaster Health Forum; 2018 Dec p. 36. Available from:  
38 582 [https://www.mcmasterforum.org/docs/default-source/product-documents/rapid-](https://www.mcmasterforum.org/docs/default-source/product-documents/rapid-responses/creating-rapid-learning-health-systems-in-canada.pdf?sfvrsn=4)  
39 583 [responses/creating-rapid-learning-health-systems-in-canada.pdf?sfvrsn=4](https://www.mcmasterforum.org/docs/default-source/product-documents/rapid-responses/creating-rapid-learning-health-systems-in-canada.pdf?sfvrsn=4)

584

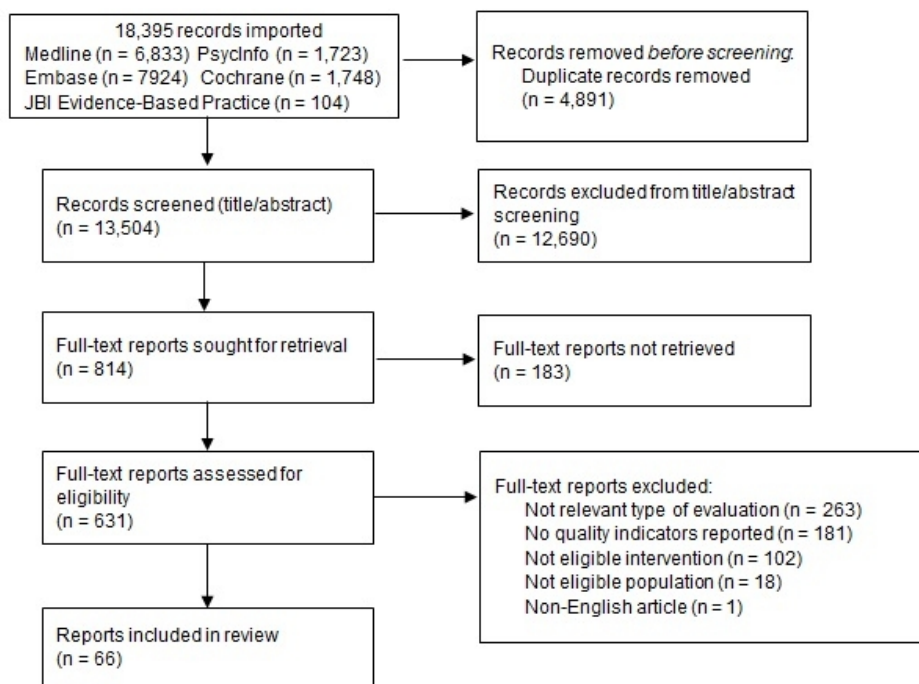

PRISMA study flow diagram

54x39mm (300 x 300 DPI)

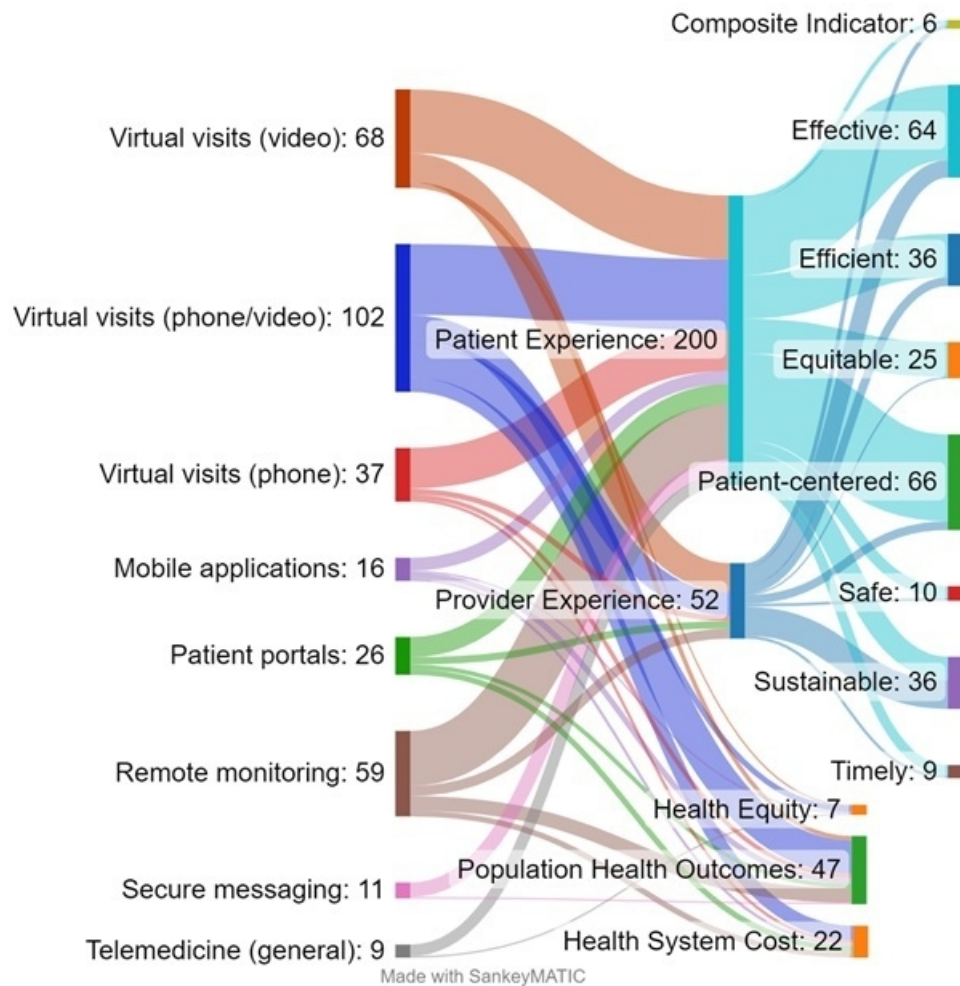

Alluvial diagram connecting virtual care modalities to the Quintuple Aim and quality domains. Through the middle are the Quintuple Aim domains, with curved bars representing connection to the virtual care modality (left) and NAM quality domains (right). For example, the 59 mentions of remote monitoring (left) were mostly connected with patient experience, followed by population health outcomes, then provider experience. The thick vertical bars show the frequency compared to the other domains: virtual visits were the most common modality; patient experience was the most common Quintuple Aim domain; and patient-centredness was the most common NAM quality domain.

52x52mm (300 x 300 DPI)

**S1 Table - Preferred Reporting Items for Systematic reviews and Meta-Analyses extension for Scoping Reviews (PRISMA-ScR) Checklist**

| SECTION                           | ITEM | PRISMA-ScR CHECKLIST ITEM                                                                                                                                                                                                                                                                                  | REPORTED ON PAGE #       |
|-----------------------------------|------|------------------------------------------------------------------------------------------------------------------------------------------------------------------------------------------------------------------------------------------------------------------------------------------------------------|--------------------------|
| <b>TITLE</b>                      |      |                                                                                                                                                                                                                                                                                                            |                          |
| Title                             | 1    | Identify the report as a scoping review.                                                                                                                                                                                                                                                                   | 1                        |
| <b>ABSTRACT</b>                   |      |                                                                                                                                                                                                                                                                                                            |                          |
| Structured summary                | 2    | Provide a structured summary that includes (as applicable): background, objectives, eligibility criteria, sources of evidence, charting methods, results, and conclusions that relate to the review questions and objectives.                                                                              | 2-3                      |
| <b>INTRODUCTION</b>               |      |                                                                                                                                                                                                                                                                                                            |                          |
| Rationale                         | 3    | Describe the rationale for the review in the context of what is already known. Explain why the review questions/objectives lend themselves to a scoping review approach.                                                                                                                                   | 4-6                      |
| Objectives                        | 4    | Provide an explicit statement of the questions and objectives being addressed with reference to their key elements (e.g., population or participants, concepts, and context) or other relevant key elements used to conceptualize the review questions and/or objectives.                                  | 5-6                      |
| <b>METHODS</b>                    |      |                                                                                                                                                                                                                                                                                                            |                          |
| Protocol and registration         | 5    | Indicate whether a review protocol exists; state if and where it can be accessed (e.g., a Web address); and if available, provide registration information, including the registration number.                                                                                                             | No protocol registered   |
| Eligibility criteria              | 6    | Specify characteristics of the sources of evidence used as eligibility criteria (e.g., years considered, language, and publication status), and provide a rationale.                                                                                                                                       | 7                        |
| Information sources*              | 7    | Describe all information sources in the search (e.g., databases with dates of coverage and contact with authors to identify additional sources), as well as the date the most recent search was executed.                                                                                                  | 6                        |
| Search                            | 8    | Present the full electronic search strategy for at least 1 database, including any limits used, such that it could be repeated.                                                                                                                                                                            | Supplementary Material 2 |
| Selection of sources of evidence† | 9    | State the process for selecting sources of evidence (i.e., screening and eligibility) included in the scoping review.                                                                                                                                                                                      | 7-8                      |
| Data charting process‡            | 10   | Describe the methods of charting data from the included sources of evidence (e.g., calibrated forms or forms that have been tested by the team before their use, and whether data charting was done independently or in duplicate) and any processes for obtaining and confirming data from investigators. | 8-9                      |
| Data items                        | 11   | List and define all variables for which data were sought and any assumptions and simplifications made.                                                                                                                                                                                                     | 8-9                      |
| Critical appraisal of individual  | 12   | If done, provide a rationale for conducting a critical appraisal of included sources of evidence; describe                                                                                                                                                                                                 | N/A                      |

| SECTION                                       | ITEM | PRISMA-ScR CHECKLIST ITEM                                                                                                                                                                       | REPORTED ON PAGE # |
|-----------------------------------------------|------|-------------------------------------------------------------------------------------------------------------------------------------------------------------------------------------------------|--------------------|
| sources of evidence§                          |      | the methods used and how this information was used in any data synthesis (if appropriate).                                                                                                      |                    |
| Synthesis of results                          | 13   | Describe the methods of handling and summarizing the data that were charted.                                                                                                                    | 9                  |
| <b>RESULTS</b>                                |      |                                                                                                                                                                                                 |                    |
| Selection of sources of evidence              | 14   | Give numbers of sources of evidence screened, assessed for eligibility, and included in the review, with reasons for exclusions at each stage, ideally using a flow diagram.                    | 9-10               |
| Characteristics of sources of evidence        | 15   | For each source of evidence, present characteristics for which data were charted and provide the citations.                                                                                     | 10-12              |
| Critical appraisal within sources of evidence | 16   | If done, present data on critical appraisal of included sources of evidence (see item 12).                                                                                                      | N/A                |
| Results of individual sources of evidence     | 17   | For each included source of evidence, present the relevant data that were charted that relate to the review questions and objectives.                                                           | 13-18              |
| Synthesis of results                          | 18   | Summarize and/or present the charting results as they relate to the review questions and objectives.                                                                                            | 13-18              |
| <b>DISCUSSION</b>                             |      |                                                                                                                                                                                                 |                    |
| Summary of evidence                           | 19   | Summarize the main results (including an overview of concepts, themes, and types of evidence available), link to the review questions and objectives, and consider the relevance to key groups. | 18-22              |
| Limitations                                   | 20   | Discuss the limitations of the scoping review process.                                                                                                                                          | 23                 |
| Conclusions                                   | 21   | Provide a general interpretation of the results with respect to the review questions and objectives, as well as potential implications and/or next steps.                                       | 24                 |
| <b>FUNDING</b>                                |      |                                                                                                                                                                                                 |                    |
| Funding                                       | 22   | Describe sources of funding for the included sources of evidence, as well as sources of funding for the scoping review. Describe the role of the funders of the scoping review.                 | 23                 |

JB1 = Joanna Briggs Institute; PRISMA-ScR = Preferred Reporting Items for Systematic reviews and Meta-Analyses extension for Scoping Reviews.

\* Where *sources of evidence* (see second footnote) are compiled from, such as bibliographic databases, social media platforms, and Web sites.

† A more inclusive/heterogeneous term used to account for the different types of evidence or data sources (e.g., quantitative and/or qualitative research, expert opinion, and policy documents) that may be eligible in a scoping review as opposed to only studies. This is not to be confused with *information sources* (see first footnote).

‡ The frameworks by Arksey and O'Malley (6) and Levac and colleagues (7) and the JBI guidance (4, 5) refer to the process of data extraction in a scoping review as data charting.

§ The process of systematically examining research evidence to assess its validity, results, and relevance before using it to inform a decision. This term is used for items 12 and 19 instead of "risk of bias" (which is more applicable to systematic reviews of interventions) to include and acknowledge the various sources of evidence that may be used in a scoping review (e.g., quantitative and/or qualitative research, expert opinion, and policy document).

From: Tricco AC, Lillie E, Zarin W, O'Brien KK, Colquhoun H, Levac D, et al. PRISMA Extension for Scoping Reviews (PRISMA-ScR): Checklist and Explanation. *Ann Intern Med.* 2018;169:467–473. doi: [10.7326/M18-0850](https://doi.org/10.7326/M18-0850).

Screening Criteria

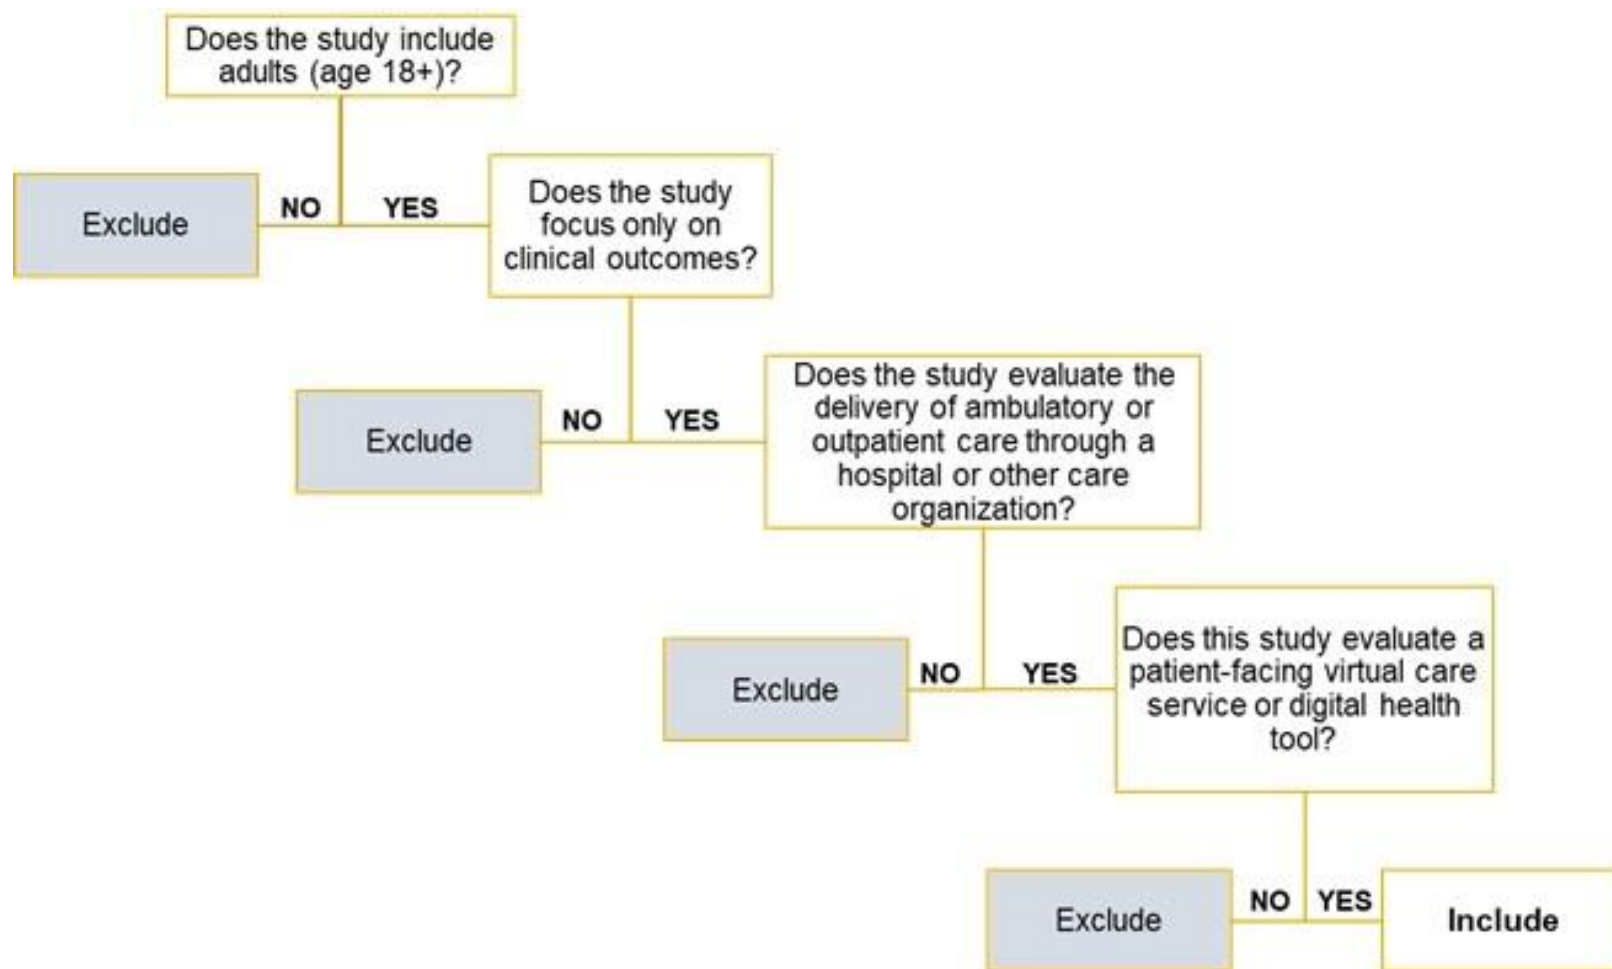



**Table 1 - Database search strategies**

| <b>Ovid MEDLINE: Epub Ahead of Print, In-Process &amp; Other Non-Indexed Citations, Ovid MEDLINE® Daily and Ovid MEDLINE® 1946-2022</b> |                                                                                                                                                                                                                                                                                                                                                                                                                                                                                                               |
|-----------------------------------------------------------------------------------------------------------------------------------------|---------------------------------------------------------------------------------------------------------------------------------------------------------------------------------------------------------------------------------------------------------------------------------------------------------------------------------------------------------------------------------------------------------------------------------------------------------------------------------------------------------------|
| <b>#</b>                                                                                                                                | <b>Query</b>                                                                                                                                                                                                                                                                                                                                                                                                                                                                                                  |
| 1                                                                                                                                       | exp telemedicine/                                                                                                                                                                                                                                                                                                                                                                                                                                                                                             |
| 2                                                                                                                                       | exp internet-based intervention/                                                                                                                                                                                                                                                                                                                                                                                                                                                                              |
| 3                                                                                                                                       | (remot* adj2 (consult* or interact* or diagnos* or monitor* or treat* or therap* or care)).tw,kf.                                                                                                                                                                                                                                                                                                                                                                                                             |
| 4                                                                                                                                       | (telemonitor* or telemedicine* or telecommunication* or telehealth*).tw,kf.                                                                                                                                                                                                                                                                                                                                                                                                                                   |
| 5                                                                                                                                       | (((remote or online or video* or text message* or telephone* or phone or phones or email* or virtual* or technolog* or iphone* or smartphone* or mobile application* or mobile app* or teleconferenc* or messenger or whatsapp or skype or zoom or instant messag* or tablet* or e-mail* or asynchronous messag* or synchronous messag* or Videoconferenc* or hotline* or helpline* or call center*) adj3 (communicat* or engag* or discuss* or care or interact* or clinical guidance)) and patient*).tw,kf. |
| 6                                                                                                                                       | (((remote or online or electronic* or video* or text message* or telephone* or phone* or email* or technolog* or virtual* or iphone* or smartphone* or mobile application* or mobile app* or teleconferenc* or messenger or whatsapp or skype or zoom or instant messag* or tablet* or e-mail* or asynchronous messag* or synchronous messag* or Videoconferenc* or hotline* or helpline* or call center*) adj3 (consult* or appointment* or meet or meeting* or visit*)) or virtual tool*).tw,kf.            |
| 7                                                                                                                                       | ((virtual* or digital*) adj3 (healthcare or health care or health strategy)).tw,kw,kf. or (virtual care or virtual health).tw,kf. or (rapid* adj3 virtual*).tw,kf.                                                                                                                                                                                                                                                                                                                                            |
| 8                                                                                                                                       | ((online or digital* or virtual*) adj3 (doctor* or physician* or clinic or clinics or nurse or nurses or nursing or medicine or medical)).tw,kf.                                                                                                                                                                                                                                                                                                                                                              |
| 9                                                                                                                                       | (digital health or digital first).tw,kf.                                                                                                                                                                                                                                                                                                                                                                                                                                                                      |
| 10                                                                                                                                      | ("e health*" or ehealth* or evisit* or "e-visit").tw,kf.                                                                                                                                                                                                                                                                                                                                                                                                                                                      |
| 11                                                                                                                                      | (online adj3 (healthcare or health care)).tw,kf.                                                                                                                                                                                                                                                                                                                                                                                                                                                              |
| 12                                                                                                                                      | ((virtual* or digital*) adj3 (healthcare or health care or health strategy)).tw,kf.                                                                                                                                                                                                                                                                                                                                                                                                                           |
| 13                                                                                                                                      | (teleassist* or "tele-assist*" or teleaudiolog* or "tele-audiolog*" or telebased or "tele-based" or telecancer or "tele-cancer" or "tele-cardiolo*" or telecardiolog* or teleconsult* or "tele-consult*" or telecounselling or "tele-counselling" or telecounseling or "tele-counseling" or teledental or "tele-dental" or telederm* or "tele-derm*" or telediagnos* or "tele-diagnos*" or teledialysis or "tele-dialysis" or teleecho* or "tele-echo*" or teleemerg* or "tele-emerg*" or teleepileps* or     |

|    |                                                                                                                                                                                                                                                                                                                                                                                                                                                                                                                                                                                                                                                                                                                                                                                                                                                    |
|----|----------------------------------------------------------------------------------------------------------------------------------------------------------------------------------------------------------------------------------------------------------------------------------------------------------------------------------------------------------------------------------------------------------------------------------------------------------------------------------------------------------------------------------------------------------------------------------------------------------------------------------------------------------------------------------------------------------------------------------------------------------------------------------------------------------------------------------------------------|
|    | "tele-epileps*" or telefollow* or "tele-follow*" or teleguidance or "tele-guidance" or "tele-health*" or telehome* or "tele-home*" or teleICU or "tele-ICU" or teleintervention* or "tele-intervention*" or telemanag* or "tele-manag*" or telemedicine or "tele-medicine" or telemental* or "tele-mental*" or telemonitor* or "tele-monitor*" or telenurs* or "tele-nurs*" or teleoncolo* or "tele-oncolo*" or teleophthalm* or "tele-ophthalm*" or telepalliat* or "tele-palliat*" or "tele-patholog*" or teleprocedu* or "tele-procedu*" or telepsych* or "tele-psych*" or teleradiol* or "tele-radiol*" or telerefer* or "tele-refer*" or telerehab* or "tele-rehab*" or telesurger* or "tele-surger*" or telesurgic* or "tele-surgic*" or teletherap* or "tele-therap*" or teletreat* or "tele-treat*" or teletriage or "tele-triage").tw,kf. |
| 14 | (tele adj (care or counselling or counseling or diagnos* or health* or intervention* or manag* or therap* or treat* or medicine or medical or nursing)).tw,kf.                                                                                                                                                                                                                                                                                                                                                                                                                                                                                                                                                                                                                                                                                     |
| 15 | ("e-care" or ecare or "e-consult*" or econsult* or "e-diagnos*" or ediagnosis* or "e-medicine" or emedicine or "e-nurse*" or enurse* or "e-nursing" or enursing or "e-physician*" or ephysician* or "e-psych*" or epsych* or "e-therapy" or etherapy or mhEALTH or "M-HEALTH").tw,kf.                                                                                                                                                                                                                                                                                                                                                                                                                                                                                                                                                              |
| 16 | ((online or video* or text message* or telephone* or phon* or email* or virtual* or technolog* or iphone* or smartphone* or mobile application* or mobile app* or teleconferenc* or messenger or instant messag* or whatsapp or skype or zoom or tablet* or e-mail* or asynchronous messag* or synchronous messag* or Videoconferenc* or hotline* or helpline* or call center*) adj2 (care or counselling or Counseling or diagnos* or health* or intervention* or manag* or therap* or treat* or medicine or medical or nursing)).tw,kf.                                                                                                                                                                                                                                                                                                          |
| 17 | (virtual* adj3 monitor*).tw,kf.                                                                                                                                                                                                                                                                                                                                                                                                                                                                                                                                                                                                                                                                                                                                                                                                                    |
| 18 | ((implant* sensor* or body sensor*) adj4 (diagnost* or monitor* or report*)).tw,kf.                                                                                                                                                                                                                                                                                                                                                                                                                                                                                                                                                                                                                                                                                                                                                                |
| 19 | mobile health monitor*.tw,kf.                                                                                                                                                                                                                                                                                                                                                                                                                                                                                                                                                                                                                                                                                                                                                                                                                      |
| 20 | 1 or 2 or 3 or 4 or 5 or 6 or 7 or 8 or 9 or 10 or 11 or 12 or 13 or 14 or 15 or 16 or 17 or 18 or 19                                                                                                                                                                                                                                                                                                                                                                                                                                                                                                                                                                                                                                                                                                                                              |
| 21 | "Outcome and Process Assessment, Health Care"/                                                                                                                                                                                                                                                                                                                                                                                                                                                                                                                                                                                                                                                                                                                                                                                                     |
| 22 | Quality Assurance, Health Care/                                                                                                                                                                                                                                                                                                                                                                                                                                                                                                                                                                                                                                                                                                                                                                                                                    |
| 23 | Benchmarking/                                                                                                                                                                                                                                                                                                                                                                                                                                                                                                                                                                                                                                                                                                                                                                                                                                      |
| 24 | Total Quality Management/                                                                                                                                                                                                                                                                                                                                                                                                                                                                                                                                                                                                                                                                                                                                                                                                                          |
| 25 | Quality Improvement/                                                                                                                                                                                                                                                                                                                                                                                                                                                                                                                                                                                                                                                                                                                                                                                                                               |
| 26 | Quality Indicators, Health Care/                                                                                                                                                                                                                                                                                                                                                                                                                                                                                                                                                                                                                                                                                                                                                                                                                   |
| 27 | "Utilization Review"/                                                                                                                                                                                                                                                                                                                                                                                                                                                                                                                                                                                                                                                                                                                                                                                                                              |
| 28 | Patient Outcome Assessment/                                                                                                                                                                                                                                                                                                                                                                                                                                                                                                                                                                                                                                                                                                                                                                                                                        |



|                                           |                                                                                                                                                                                                                                                                                                                                                                                                                                                                                                                     |
|-------------------------------------------|---------------------------------------------------------------------------------------------------------------------------------------------------------------------------------------------------------------------------------------------------------------------------------------------------------------------------------------------------------------------------------------------------------------------------------------------------------------------------------------------------------------------|
| 29                                        | (quality indicat* or quality metric or quality standard* or quality measure* or quality report* or performance measure* or metric or performance metric or usability or care evaluation or benchmark* or scorecard or balanced scorecard or logic model).tw,kf.                                                                                                                                                                                                                                                     |
| 30                                        | (quality adj3 (indicat* or metric* or standard* or measure*)).tw,kf.                                                                                                                                                                                                                                                                                                                                                                                                                                                |
| 31                                        | 21 or 22 or 23 or 24 or 25 or 26 or 27 or 28 or 29 or 30 or 31                                                                                                                                                                                                                                                                                                                                                                                                                                                      |
| 32                                        | 20 and 32                                                                                                                                                                                                                                                                                                                                                                                                                                                                                                           |
| 33                                        | limit 33 to (english language and yr="2015 -Current")                                                                                                                                                                                                                                                                                                                                                                                                                                                               |
| <b>Embase Classic+Embase 1947 to 2022</b> |                                                                                                                                                                                                                                                                                                                                                                                                                                                                                                                     |
| 1                                         | telecommunication/                                                                                                                                                                                                                                                                                                                                                                                                                                                                                                  |
| 2                                         | (remot* adj2 (consult* or interact* or diagnos* or monitor* or treat* or therap* or care)).tw,kw.                                                                                                                                                                                                                                                                                                                                                                                                                   |
| 3                                         | (telemonitor* or telemedicine* or telecommunication* or telehealth*).tw,kw.                                                                                                                                                                                                                                                                                                                                                                                                                                         |
| 4                                         | ((remote or online or video* or text message* or telephone* or phone or phones or email* or virtual* or technolog* or iphone* or smartphone* or mobile application* or mobile app* or teleconferenc* or messenger or whatsapp or skype or zoom or instant messag* or tablet* or e-mail* or asynchronous messag* or synchronous messag* or Videoconferenc* or hotline* or helpline* or call center*) adj3 (communicat* or engag* or discuss* or care or interact* or clinical guidance)).tw,kw. and patient*.tw, kw. |
| 5                                         | ((remote or online or electronic* or video* or text message* or telephone* or phone* or email* or technolog* or virtual* or iphone* or smartphone* or mobile application* or mobile app* or teleconferenc* or messenger or whatsapp or skype or zoom or instant messag* or tablet* or e-mail* or asynchronous messag* or synchronous messag* or Videoconferenc* or hotline* or helpline* or call center*) adj3 (consult* or appointment* or meet or meeting* or visit*)) or virtual tool*).tw,kw.                   |
| 6                                         | ((virtual* or digital*) adj3 (healthcare or health care or health strategy)) or (virtual care or virtual health) or (rapid* adj3 virtual*).tw,kw.                                                                                                                                                                                                                                                                                                                                                                   |
| 7                                         | ((online or digital* or virtual*) adj3 (doctor* or physician* or clinic or clinics or nurse or nurses or nursing or medicine or medical)).tw,kw.                                                                                                                                                                                                                                                                                                                                                                    |
| 8                                         | (digital health or digital first).tw,kw.                                                                                                                                                                                                                                                                                                                                                                                                                                                                            |
| 9                                         | ("e health*" or ehealth* or evisit* or "e-visit*").tw,kw.                                                                                                                                                                                                                                                                                                                                                                                                                                                           |
| 10                                        | (online adj3 (healthcare or health care)).tw,kw.                                                                                                                                                                                                                                                                                                                                                                                                                                                                    |
| 11                                        | ((virtual* or digital*) adj3 (healthcare or health care or health strategy)).tw,kw.                                                                                                                                                                                                                                                                                                                                                                                                                                 |

|    |                                                                                                                                                                                                                                                                                                                                                                                                                                                                                                                                                                                                                                                                                                                                                                                                                                                                                                                                                                                                                                                                                                                                                                                                                                                                                                                                                              |
|----|--------------------------------------------------------------------------------------------------------------------------------------------------------------------------------------------------------------------------------------------------------------------------------------------------------------------------------------------------------------------------------------------------------------------------------------------------------------------------------------------------------------------------------------------------------------------------------------------------------------------------------------------------------------------------------------------------------------------------------------------------------------------------------------------------------------------------------------------------------------------------------------------------------------------------------------------------------------------------------------------------------------------------------------------------------------------------------------------------------------------------------------------------------------------------------------------------------------------------------------------------------------------------------------------------------------------------------------------------------------|
| 12 | (teleassist* or "tele-assist*" or teleaudiolog* or "tele-audiolog*" or telebased or "tele-based" or telecancer or "tele-cancer" or "tele-cardiolo*" or telecardiolog* or teleconsult* or "tele-consult*" or telecounselling or "tele-counselling" or telecounseling or "tele-counseling" or teledental or "tele-dental" or telederm* or "tele-derm*" or telediagnos* or "tele-diagnos*" or teledialysis or "tele-dialysis" or teleecho* or "tele-echo*" or teleemerg* or "tele-emerg*" or teleepileps* or "tele-epileps*" or telefollow* or "tele-follow*" or teleguidance or "tele-guidance" or "tele-health*" or telehome* or "tele-home*" or teleICU or "tele-ICU" or teleintervention* or "tele-intervention*" or telemanag* or "tele-manag*" or telemedicine or "tele-medicine" or telemental* or "tele-mental*" or telemonitor* or "tele-monitor*" or telenurs* or "tele-nurs*" or teleoncolo* or "tele-oncolo*" or teleophthalm* or "tele-ophthalm*" or telepalliat* or "tele-palliat*" or "tele-patholog*" or teleprocedu* or "tele-procedu*" or telepsych* or "tele-psych*" or teleradiol* or "tele-radiol*" or telerefer* or "tele-refer*" or telerehab* or "tele-rehab*" or telesurger* or "tele-surger*" or telesurgic* or "tele-surgic*" or teletherap* or "tele-therap*" or teletreat* or "tele-treat*" or teletriage or "tele-triage").tw,kw. |
| 13 | (tele adj (care or counselling or counseling or diagnos* or health* or intervention* or manag* or therap* or treat* or medicine or medical or nursing)).tw,kw.                                                                                                                                                                                                                                                                                                                                                                                                                                                                                                                                                                                                                                                                                                                                                                                                                                                                                                                                                                                                                                                                                                                                                                                               |
| 14 | ("e-care" or ecare or "e-consult*" or econsult* or "e-diagnos*" or edagnosis* or "e-medicine" or emedicine or "e-nurse*" or enurse* or "e-nursing" or enursing or "e-physician*" or ephysician* or "e-psych*" or epsych* or "e-therapy" or etherapy or mhHEALTH or "M-HEALTH").tw,kw.                                                                                                                                                                                                                                                                                                                                                                                                                                                                                                                                                                                                                                                                                                                                                                                                                                                                                                                                                                                                                                                                        |
| 15 | ((online or video* or text message* or telephone* or phon* or email* or virtual* or technolog* or iphone* or smartphone* or mobile application* or mobile app* or teleconferenc* or messenger or instant messag* or whatsapp or skype or zoom or tablet* or e-mail* or asynchronous messag* or synchronous messag* or Videoconferenc* or hotline* or helpline* or call center*) adj2 (care or counselling or Counseling or diagnos* or health* or intervention* or manag* or therap* or treat* or medicine or medical or nursing)).tw,kw.                                                                                                                                                                                                                                                                                                                                                                                                                                                                                                                                                                                                                                                                                                                                                                                                                    |
| 16 | (virtual* adj3 monitor*).tw,kw.                                                                                                                                                                                                                                                                                                                                                                                                                                                                                                                                                                                                                                                                                                                                                                                                                                                                                                                                                                                                                                                                                                                                                                                                                                                                                                                              |
| 17 | ((implant* sensor* or body sensor*) adj4 (diagnost* or monitor* or report*)).tw,kw.                                                                                                                                                                                                                                                                                                                                                                                                                                                                                                                                                                                                                                                                                                                                                                                                                                                                                                                                                                                                                                                                                                                                                                                                                                                                          |
| 18 | mobile health monitor*.tw,kw.                                                                                                                                                                                                                                                                                                                                                                                                                                                                                                                                                                                                                                                                                                                                                                                                                                                                                                                                                                                                                                                                                                                                                                                                                                                                                                                                |
| 19 | wearable computer/                                                                                                                                                                                                                                                                                                                                                                                                                                                                                                                                                                                                                                                                                                                                                                                                                                                                                                                                                                                                                                                                                                                                                                                                                                                                                                                                           |
| 20 | or/1-19                                                                                                                                                                                                                                                                                                                                                                                                                                                                                                                                                                                                                                                                                                                                                                                                                                                                                                                                                                                                                                                                                                                                                                                                                                                                                                                                                      |
| 21 | Health care quality/                                                                                                                                                                                                                                                                                                                                                                                                                                                                                                                                                                                                                                                                                                                                                                                                                                                                                                                                                                                                                                                                                                                                                                                                                                                                                                                                         |
| 22 | Benchmarking/                                                                                                                                                                                                                                                                                                                                                                                                                                                                                                                                                                                                                                                                                                                                                                                                                                                                                                                                                                                                                                                                                                                                                                                                                                                                                                                                                |
| 23 | Total quality management/                                                                                                                                                                                                                                                                                                                                                                                                                                                                                                                                                                                                                                                                                                                                                                                                                                                                                                                                                                                                                                                                                                                                                                                                                                                                                                                                    |
| 24 | "utilization review"/                                                                                                                                                                                                                                                                                                                                                                                                                                                                                                                                                                                                                                                                                                                                                                                                                                                                                                                                                                                                                                                                                                                                                                                                                                                                                                                                        |

|                 |                                                                                                                                                                                                                                                                                                                                                                                                                                                                                                                |
|-----------------|----------------------------------------------------------------------------------------------------------------------------------------------------------------------------------------------------------------------------------------------------------------------------------------------------------------------------------------------------------------------------------------------------------------------------------------------------------------------------------------------------------------|
| 25              | (quality indicat* or quality metric or quality standard* or quality measure* or quality report* or performance measure* or metric or performance metric or usability or care evaluation or benchmark* or scorecard or balanced scorecard or logic model).tw,kw                                                                                                                                                                                                                                                 |
| 26              | (quality adj2 (indicat* or metric* or standard* or measure*)).tw,kw.                                                                                                                                                                                                                                                                                                                                                                                                                                           |
| 27              | Or/21-26                                                                                                                                                                                                                                                                                                                                                                                                                                                                                                       |
| 28              | 20 and 27                                                                                                                                                                                                                                                                                                                                                                                                                                                                                                      |
| 29              | limit 28 to (english language and yr="2015 - 2021")                                                                                                                                                                                                                                                                                                                                                                                                                                                            |
| <b>PsycInfo</b> |                                                                                                                                                                                                                                                                                                                                                                                                                                                                                                                |
| 1               | exp telemedicine/                                                                                                                                                                                                                                                                                                                                                                                                                                                                                              |
| 2               | (remot* adj2 (consult* or interact* or diagnos* or monitor* or treat* or therap* or care)).tw,sh.                                                                                                                                                                                                                                                                                                                                                                                                              |
| 3               | (telemonitor* or telemedicine* or telecommunication* or telehealth*).tw,sh.                                                                                                                                                                                                                                                                                                                                                                                                                                    |
| 4               | ((((remote or online or video* or text message* or telephone* or phone or phones or email* or virtual* or technolog* or iphone* or smartphone* or mobile application* or mobile app* or teleconferenc* or messenger or whatsapp or skype or zoom or instant messag* or tablet* or e-mail* or asynchronous messag* or synchronous messag* or Videoconferenc* or hotline* or helpline* or call center*) adj3 (communicat* or engag* or discuss* or care or interact* or clinical guidance)) and patient*).tw,sh. |
| 5               | ((((remote or online or electronic* or video* or text message* or telephone* or phone* or email* or technolog* or virtual* or iphone* or smartphone* or mobile application* or mobile app* or teleconferenc* or messenger or whatsapp or skype or zoom or instant messag* or tablet* or e-mail* or asynchronous messag* or synchronous messag* or Videoconferenc* or hotline* or helpline* or call center*) adj3 (consult* or appointment* or meet or meeting* or visit*)) or virtual tool*).tw,sh.            |
| 6               | ((((virtual* or digital*) adj3 (healthcare or health care or health strategy)) or (virtual care or virtual health) or (rapid* adj3 virtual*)).tw,sh.                                                                                                                                                                                                                                                                                                                                                           |
| 7               | ((online or digital* or virtual*) adj3 (doctor* or physician* or clinic or clinics or nurse or nurses or nursing or medicine or medical)).tw,sh.                                                                                                                                                                                                                                                                                                                                                               |
| 8               | (digital health or digital first).tw,sh.                                                                                                                                                                                                                                                                                                                                                                                                                                                                       |
| 9               | ("e health*" or ehealth* or evisit* or "e-visit*").tw,sh.                                                                                                                                                                                                                                                                                                                                                                                                                                                      |
| 10              | ((virtual* or digital*) adj3 (healthcare or health care or health strategy)).tw,sh.                                                                                                                                                                                                                                                                                                                                                                                                                            |
| 11              | (teleassist* or "tele-assist*" or teleaudiolog* or "tele-audiolog*" or telebased or "tele-based" or telecancer or "tele-cancer" or "tele-cardiolo*" or telecardiolog* or teleconsult* or "tele-consult*" or telecounselling or "tele-counselling" or telecounseling or "tele-counseling" or teledental or                                                                                                                                                                                                      |

|    |                                                                                                                                                                                                                                                                                                                                                                                                                                                                                                                                                                                                                                                                                                                                                                                                                                                                                                                                                                                                                                                    |
|----|----------------------------------------------------------------------------------------------------------------------------------------------------------------------------------------------------------------------------------------------------------------------------------------------------------------------------------------------------------------------------------------------------------------------------------------------------------------------------------------------------------------------------------------------------------------------------------------------------------------------------------------------------------------------------------------------------------------------------------------------------------------------------------------------------------------------------------------------------------------------------------------------------------------------------------------------------------------------------------------------------------------------------------------------------|
|    | "tele-dental" or telederm* or "tele-derm*" or telediagnos* or "tele-diagnos*" or teledialysis or "tele-dialysis" or teleecho* or "tele-echo*" or teleemerg* or "tele-emerg*" or teleepileps* or "tele-epileps*" or telefollow* or "tele-follow*" or teleguidance or "tele-guidance" or "tele-health*" or telehome* or "tele-home*" or teleICU or "tele-ICU" or teleintervention* or "tele-intervention*" or telemanag* or "tele-manag*" or telemedicine or "tele-medicine" or telemental* or "tele-mental*" or telemonitor* or "tele-monitor*" or telenurs* or "tele-nurs*" or teleoncolo* or "tele-oncolo*" or teleophthalm* or "tele-ophthalm*" or telepalliat* or "tele-palliat*" or "tele-patholog*" or teleprocedu* or "tele-procedu*" or telepsych* or "tele-psych*" or teleradiol* or "tele-radiol*" or telerefer* or "tele-refer*" or telerehab* or "tele-rehab*" or telesurger* or "tele-surger*" or telesurgic* or "tele-surgic*" or teletherap* or "tele-therap*" or teletreat* or "tele-treat*" or teletriage or "tele-triage").tw,sh. |
| 12 | (tele adj (care or counselling or counseling or diagnos* or health* or intervention* or manag* or therap* or treat* or medicine or medical or nursing)).tw,sh.                                                                                                                                                                                                                                                                                                                                                                                                                                                                                                                                                                                                                                                                                                                                                                                                                                                                                     |
| 13 | ("e-care" or ecare or "e-consult*" or econsult* or "e-diagnos*" or ediagnosis* or "e-medicine" or emedicine or "e-nurse*" or enurse* or "e-nursing" or enursing or "e-physician*" or ephysician* or "e-psych*" or epsych* or "e-therapy" or etherapy or mhEALTH or "M-HEALTH").tw,sh.                                                                                                                                                                                                                                                                                                                                                                                                                                                                                                                                                                                                                                                                                                                                                              |
| 14 | ((online or video* or text message* or telephone* or phon* or email* or virtual* or technolog* or iphone* or smartphone* or mobile application* or mobile app* or teleconferenc* or messenger or instant messag* or whatsapp or skype or zoom or tablet* or e-mail* or asynchronous messag* or synchronous messag* or Videoconferenc* or hotline* or helpline* or call center*) adj2 (care or counselling or Counseling or diagnos* or health* or intervention* or manag* or therap* or treat* or medicine or medical or nursing)).tw,sh.                                                                                                                                                                                                                                                                                                                                                                                                                                                                                                          |
| 15 | (virtual* adj3 monitor*).tw,sh.                                                                                                                                                                                                                                                                                                                                                                                                                                                                                                                                                                                                                                                                                                                                                                                                                                                                                                                                                                                                                    |
| 16 | ((implant* sensor* or body sensor*) adj4 (diagnost* or monitor* or report*)).tw,sh.                                                                                                                                                                                                                                                                                                                                                                                                                                                                                                                                                                                                                                                                                                                                                                                                                                                                                                                                                                |
| 17 | mobile health monitor*.tw,sh.                                                                                                                                                                                                                                                                                                                                                                                                                                                                                                                                                                                                                                                                                                                                                                                                                                                                                                                                                                                                                      |
| 18 | (online adj3 (healthcare or health care)).tw,sh.                                                                                                                                                                                                                                                                                                                                                                                                                                                                                                                                                                                                                                                                                                                                                                                                                                                                                                                                                                                                   |
| 19 | 1 or 2 or 3 or 4 or 5 or 6 or 7 or 8 or 9 or 10 or 11 or 12 or 13 or 14 or 15 or 16 or 17 or 18 (quality                                                                                                                                                                                                                                                                                                                                                                                                                                                                                                                                                                                                                                                                                                                                                                                                                                                                                                                                           |
| 20 | indicat* or quality metric or quality standard* or quality measure* or quality report* or performance measure* or metric or performance metric or usability or care evaluation or benchmark* or scorecard or balanced scorecard or logic model).tw,sh.                                                                                                                                                                                                                                                                                                                                                                                                                                                                                                                                                                                                                                                                                                                                                                                             |
| 21 | (quality adj3 (indicat* or metric* or standard* or measure*)).tw,sh.                                                                                                                                                                                                                                                                                                                                                                                                                                                                                                                                                                                                                                                                                                                                                                                                                                                                                                                                                                               |
| 22 | exp "quality of services"/                                                                                                                                                                                                                                                                                                                                                                                                                                                                                                                                                                                                                                                                                                                                                                                                                                                                                                                                                                                                                         |
| 23 | exp "Quality of Care"/                                                                                                                                                                                                                                                                                                                                                                                                                                                                                                                                                                                                                                                                                                                                                                                                                                                                                                                                                                                                                             |
| 24 | exp Program Evaluation/                                                                                                                                                                                                                                                                                                                                                                                                                                                                                                                                                                                                                                                                                                                                                                                                                                                                                                                                                                                                                            |

|     |                                                                                                                                                                                                                                                                   |
|-----|-------------------------------------------------------------------------------------------------------------------------------------------------------------------------------------------------------------------------------------------------------------------|
| 25  | 20 or 21 or 22 or 23 or 24                                                                                                                                                                                                                                        |
| 26  | 19 and 25                                                                                                                                                                                                                                                         |
| 27  | limit 26 to (english language and yr="2015 - 2021")                                                                                                                                                                                                               |
|     | Cochrane Library                                                                                                                                                                                                                                                  |
| #1  | MeSH descriptor: [Telemedicine] explode all trees                                                                                                                                                                                                                 |
| #2  | MeSH descriptor: [Internet-Based Intervention] explode all trees                                                                                                                                                                                                  |
| #3  | (remote consult*) or (remote interact*) pr (remote diagnos*) or (remote monitor*) or (remote treat*) or (remote therap*) or (remote care):ti,ab,kw                                                                                                                |
| #4  | (virtual health*) or (digital health*) or (online health*) or (ehealth*) or (mobile health*):ti,ab, kw                                                                                                                                                            |
| #5  | #1 or #2 or #3 or #4                                                                                                                                                                                                                                              |
| #6  | MeSH descriptor: [Quality of Health Care] this term only                                                                                                                                                                                                          |
| #7  | MeSH descriptor: [Outcome and Process Assessment, Health Care] this term only                                                                                                                                                                                     |
| #8  | MeSH descriptor: [Quality Assurance, Health Care] this term only                                                                                                                                                                                                  |
| #9  | MeSH descriptor: [Benchmarking] this term only                                                                                                                                                                                                                    |
| #10 | MeSH descriptor: [Total Quality Management] this term only                                                                                                                                                                                                        |
| #11 | MeSH descriptor: [Quality Improvement] this term only                                                                                                                                                                                                             |
| #12 | MeSH descriptor: [Quality Indicators, Health Care] this term only                                                                                                                                                                                                 |
| #13 | MeSH descriptor: [Utilization Review] this term only                                                                                                                                                                                                              |
| #14 | MeSH descriptor: [Patient Outcome Assessment] this term only                                                                                                                                                                                                      |
| #15 | (quality indicat*) or (quailty metric*) or (quality standard*) or (quality measure*) or (quality report*) or (performance measure*) or (performance metric*) or (usability) or (care evaluation) or (scorecard) or (balanced scorecard) or (logic model):ti,ab,kw |
| #16 | #6 or #7 or #8 or #9 or #10 or #11 or #12 or #13 or #14 or #15                                                                                                                                                                                                    |
| #17 | #5 and #16 with Cochrane Library publication date Between Jan 2015 and Present                                                                                                                                                                                    |

**Table 2 - Grey Literature Search**

|                                  |
|----------------------------------|
| <b>Targeted Website Searches</b> |
|----------------------------------|

| <i>Organization name &amp; website URL</i>                                                                                                                                                                                                                           | <i>Search strategy(s)/ terms searched</i>                                                                                                         |
|----------------------------------------------------------------------------------------------------------------------------------------------------------------------------------------------------------------------------------------------------------------------|---------------------------------------------------------------------------------------------------------------------------------------------------|
| McMaster Health Forum<br><a href="http://www.healthsystemevidence.org">www.healthsystemevidence.org</a>                                                                                                                                                              | 1. (virtual care OR digital health) AND quality<br>2. Telemedicine AND quality indicators                                                         |
| Publications Canada<br><a href="https://publications.gc.ca">https://publications.gc.ca</a>                                                                                                                                                                           | 1. Virtual care<br>2. Telemedicine<br>3. eHealth                                                                                                  |
| Health Quality Ontario<br><a href="http://www.hqontario.ca/Evidence-to-Improve-Care/Health-Technology-Assessment">http://www.hqontario.ca/Evidence-to-Improve-Care/Health-Technology-Assessment</a>                                                                  | 1. Virtual care<br>2. Telemedicine<br>3. Telehealth                                                                                               |
| NICE<br><a href="http://www.nice.org.uk">www.nice.org.uk</a>                                                                                                                                                                                                         | 1. Virtual care<br>2. Telemedicine<br>3. Telehealth<br>4. Digital care                                                                            |
| AHRQ - EPC<br><a href="http://www.ahrq.gov/research/findings/evidence-based-reports/search.html">http://www.ahrq.gov/research/findings/evidence-based-reports/search.html</a>                                                                                        | 1. Virtual care<br>2. Telemedicine<br>3. Telehealth                                                                                               |
| AHRQ – EHC<br><a href="https://effectivehealthcare.ahrq.gov/products-tools/">https://effectivehealthcare.ahrq.gov/products-tools/</a>                                                                                                                                | 1. Virtual care<br>2. Telemedicine<br>3. Telehealth                                                                                               |
| Canadian Medical Association<br><a href="http://www.cma.ca">www.cma.ca</a>                                                                                                                                                                                           | 1. Virtual care<br>2. Telemedicine<br>3. Telehealth                                                                                               |
| Institute for Healthcare Improvement – White Papers<br><a href="http://www.ihc.org">www.ihc.org</a>                                                                                                                                                                  | N/A – no search function, reviewed ‘Publications’ and ‘White Papers’ section of site                                                              |
| Health Quality Council of Alberta<br><a href="http://hqca.ca/studies-and-reviews/completed-reviews/">http://hqca.ca/studies-and-reviews/completed-reviews/</a>                                                                                                       | 1. Virtual care<br>2. Telemedicine<br>3. Telehealth                                                                                               |
| INATHA Secretariat<br><a href="http://www.inahta.org/publications">http://www.inahta.org/publications</a>                                                                                                                                                            | 1. Virtual care<br>2. Telemedicine<br>3. Telehealth                                                                                               |
| WHO Health Evidence Network<br><a href="http://www.euro.who.int/en/what-we-do/data-and-evidence/health-evidence-network-hen/publications/by-keyword">http://www.euro.who.int/en/what-we-do/data-and-evidence/health-evidence-network-hen/publications/by-keyword</a> | 1. Virtual care<br>2. Telemedicine<br>3. Telehealth                                                                                               |
| <b>Targeted Database Searches</b>                                                                                                                                                                                                                                    |                                                                                                                                                   |
| <i>Database name &amp; URL</i>                                                                                                                                                                                                                                       | <i>Search strategy(s)/ terms searched</i>                                                                                                         |
| Google Scholar<br><a href="http://scholar.google.com">scholar.google.com</a>                                                                                                                                                                                         | 1. “virtual care” AND quality indicators<br>2. Telemedicine AND quality indicators<br>3. eHealth AND quality indicators                           |
| MedRXiv<br><a href="http://www.medrxiv.org">www.medrxiv.org</a>                                                                                                                                                                                                      | 1. Virtual care quality indicator<br>2. Telemedicine quality indicator<br>Results screened by 1 reviewer, 23 items selected for further screening |

|                                                                           |                                                                                |
|---------------------------------------------------------------------------|--------------------------------------------------------------------------------|
| OpenGrey<br><a href="http://www.opengrey.eu/">http://www.opengrey.eu/</a> | 1. Virtual care<br>Telemedicine                                                |
| <b>Targeted Journal Search</b>                                            |                                                                                |
| <i>Journal Name</i>                                                       | <i>Search strategy(s)/ terms searched</i>                                      |
| Journal of Medical Internet Research                                      | Hand-searched (reviewed table of contents) of all editions in previous 2 years |
| Lancet Digital Health                                                     | Hand-searched (reviewed table of contents) of all editions in previous 2 years |
| Nature Digital Medicine                                                   | Hand-searched (reviewed table of contents) of all editions in previous 2 years |

**Table: Frequency of NAM quality domain sub-codes.**

| <i>NAM Quality Domain</i>                                         | <b>Patient Experience<br/>(n=200)</b> | <b>Provider Experience<br/>(n=52)</b> |
|-------------------------------------------------------------------|---------------------------------------|---------------------------------------|
| <i>Effective (n=64)<br/>[n (%)]</i>                               | 52 (81)                               | 12 (19)                               |
| <i>Equitable (n=25)<br/>[n (%)]</i>                               | 24 (96)                               | 1 (4)                                 |
| <i>Efficient (n=36)<br/>[n (%)]</i>                               | 30 (83)                               | 6 (17)                                |
| <i>Patient-centered (n=66)<br/>[n (%)]</i>                        | 60 (91)                               | 6 (9)                                 |
| <i>Safe (n=10)<br/>[n (%)]</i>                                    | 8 (80)                                | 2 (20)                                |
| <i>Timely (n=9)<br/>[n (%)]</i>                                   | 7 (78)                                | 2 (22)                                |
| <i>Sustainable (n=36)<br/>[n (%)]</i>                             | 16 (44)                               | 20 (56)                               |
| <i>Composite (n=6)<br/>[n (%)]</i>                                | 3 (50)                                | 3 (50)                                |
| *Indicators that address more than one of the NAM quality domains |                                       |                                       |
