# Supplementary material for: Quality measures of virtual care in ambulatory healthcare environments: a scoping review
Source: PubMed Central journal article supplement — BMJ Open. 2024 Apr 2;14(4):e078214. doi: 10.1136/bmjopen-2023-078214 (PMC10989112; doi:10.1136/bmjopen-2023-078214), 2024-04-02
Supplement: bmjopen-2023-078214supp003.pdf [file bmjopen-2023-078214supp003.pdf]

**Table 1 - Database search strategies**

| <b>Ovid MEDLINE: Epub Ahead of Print, In-Process &amp; Other Non-Indexed Citations, Ovid MEDLINE® Daily and Ovid MEDLINE® 1946-2022</b> |                                                                                                                                                                                                                                                                                                                                                                                                                                                                                                                 |
|-----------------------------------------------------------------------------------------------------------------------------------------|-----------------------------------------------------------------------------------------------------------------------------------------------------------------------------------------------------------------------------------------------------------------------------------------------------------------------------------------------------------------------------------------------------------------------------------------------------------------------------------------------------------------|
| #                                                                                                                                       | Query                                                                                                                                                                                                                                                                                                                                                                                                                                                                                                           |
| 1                                                                                                                                       | exp telemedicine/                                                                                                                                                                                                                                                                                                                                                                                                                                                                                               |
| 2                                                                                                                                       | exp internet-based intervention/                                                                                                                                                                                                                                                                                                                                                                                                                                                                                |
| 3                                                                                                                                       | (remot* adj2 (consult* or interact* or diagnos* or monitor* or treat* or therap* or care)).tw,kf.                                                                                                                                                                                                                                                                                                                                                                                                               |
| 4                                                                                                                                       | (telemonitor* or telemedicine* or telecommunication* or telehealth*).tw,kf.                                                                                                                                                                                                                                                                                                                                                                                                                                     |
| 5                                                                                                                                       | (((((remote or online or video* or text message* or telephone* or phone or phones or email* or virtual* or technolog* or iphone* or smartphone* or mobile application* or mobile app* or teleconferenc* or messenger or whatsapp or skype or zoom or instant messag* or tablet* or e-mail* or asynchronous messag* or synchronous messag* or Videoconferenc* or hotline* or helpline* or call center*) adj3 (communicat* or engag* or discuss* or care or interact* or clinical guidance)) and patient*).tw,kf. |
| 6                                                                                                                                       | (((((remote or online or electronic* or video* or text message* or telephone* or phone* or email* or technolog* or virtual* or iphone* or smartphone* or mobile application* or mobile app* or teleconferenc* or messenger or whatsapp or skype or zoom or instant messag* or tablet* or e-mail* or asynchronous messag* or synchronous messag* or Videoconferenc* or hotline* or helpline* or call center*) adj3 (consult* or appointment* or meet or meeting* or visit*)) or virtual tool*).tw,kf.            |
| 7                                                                                                                                       | ((virtual* or digital*) adj3 (healthcare or health care or health strategy)).tw,kw,kf. or (virtual care or virtual health).tw,kf. or (rapid* adj3 virtual*).tw,kf.                                                                                                                                                                                                                                                                                                                                              |
| 8                                                                                                                                       | ((online or digital* or virtual*) adj3 (doctor* or physician* or clinic or clinics or nurse or nurses or nursing or medicine or medical)).tw,kf.                                                                                                                                                                                                                                                                                                                                                                |
| 9                                                                                                                                       | (digital health or digital first).tw,kf.                                                                                                                                                                                                                                                                                                                                                                                                                                                                        |
| 10                                                                                                                                      | ("e health*" or ehealth* or evisit* or "e-visit*").tw,kf.                                                                                                                                                                                                                                                                                                                                                                                                                                                       |
| 11                                                                                                                                      | (online adj3 (healthcare or health care)).tw,kf.                                                                                                                                                                                                                                                                                                                                                                                                                                                                |
| 12                                                                                                                                      | ((virtual* or digital*) adj3 (healthcare or health care or health strategy)).tw,kf.                                                                                                                                                                                                                                                                                                                                                                                                                             |
| 13                                                                                                                                      | (teleassist* or "tele-assist*" or teleaudiolog* or "tele-audiolog*" or telebased or "tele-based" or telecancer or "tele-cancer" or "tele-cardiolo*" or telecardiolog* or teleconsult* or "tele-consult*" or telecounselling or "tele-counselling" or telecounseling or "tele-counseling" or teledental or "tele-dental" or telederm* or "tele-derm*" or telediagnos* or "tele-diagnos*" or teledialysis or "tele-dialysis" or teleecho* or "tele-echo*" or teleemerg* or "tele-emerg*" or teleepileps* or       |

|    |                                                                                                                                                                                                                                                                                                                                                                                                                                                                                                                                                                                                                                                                                                                                                                                                                                                    |
|----|----------------------------------------------------------------------------------------------------------------------------------------------------------------------------------------------------------------------------------------------------------------------------------------------------------------------------------------------------------------------------------------------------------------------------------------------------------------------------------------------------------------------------------------------------------------------------------------------------------------------------------------------------------------------------------------------------------------------------------------------------------------------------------------------------------------------------------------------------|
|    | "tele-epileps*" or telefollow* or "tele-follow*" or teleguidance or "tele-guidance" or "tele-health*" or telehome* or "tele-home*" or teleICU or "tele-ICU" or teleintervention* or "tele-intervention*" or telemanag* or "tele-manag*" or telemedicine or "tele-medicine" or telemental* or "tele-mental*" or telemonitor* or "tele-monitor*" or telenurs* or "tele-nurs*" or teleoncolo* or "tele-oncolo*" or teleophthalm* or "tele-ophthalm*" or telepalliat* or "tele-palliat*" or "tele-patholog*" or teleprocedu* or "tele-procedu*" or telepsych* or "tele-psych*" or teleradiol* or "tele-radiol*" or telerefer* or "tele-refer*" or telerehab* or "tele-rehab*" or telesurger* or "tele-surger*" or telesurgic* or "tele-surgic*" or teletherap* or "tele-therap*" or teletreat* or "tele-treat*" or teletriage or "tele-triage").tw,kf. |
| 14 | (tele adj (care or counselling or counseling or diagnos* or health* or intervention* or manag* or therap* or treat* or medicine or medical or nursing)).tw,kf.                                                                                                                                                                                                                                                                                                                                                                                                                                                                                                                                                                                                                                                                                     |
| 15 | ("e-care" or ecare or "e-consult*" or econsult* or "e-diagnos*" or ediagnosis* or "e-medicine" or emedicine or "e-nurse*" or enurse* or "e-nursing" or enursing or "e-physician*" or ephysician* or "e-psych*" or epsych* or "e-therapy" or etherapy or mhEALTH or "M-HEALTH").tw,kf.                                                                                                                                                                                                                                                                                                                                                                                                                                                                                                                                                              |
| 16 | ((online or video* or text message* or telephone* or phon* or email* or virtual* or technolog* or iphone* or smartphone* or mobile application* or mobile app* or teleconferenc* or messenger or instant messag* or whatsapp or skype or zoom or tablet* or e-mail* or asynchronous messag* or synchronous messag* or Videoconferenc* or hotline* or helpline* or call center*) adj2 (care or counselling or Counseling or diagnos* or health* or intervention* or manag* or therap* or treat* or medicine or medical or nursing)).tw,kf.                                                                                                                                                                                                                                                                                                          |
| 17 | (virtual* adj3 monitor*).tw,kf.                                                                                                                                                                                                                                                                                                                                                                                                                                                                                                                                                                                                                                                                                                                                                                                                                    |
| 18 | ((implant* sensor* or body sensor*) adj4 (diagnost* or monitor* or report*)).tw,kf.                                                                                                                                                                                                                                                                                                                                                                                                                                                                                                                                                                                                                                                                                                                                                                |
| 19 | mobile health monitor*.tw,kf.                                                                                                                                                                                                                                                                                                                                                                                                                                                                                                                                                                                                                                                                                                                                                                                                                      |
| 20 | 1 or 2 or 3 or 4 or 5 or 6 or 7 or 8 or 9 or 10 or 11 or 12 or 13 or 14 or 15 or 16 or 17 or 18 or 19                                                                                                                                                                                                                                                                                                                                                                                                                                                                                                                                                                                                                                                                                                                                              |
| 21 | "Outcome and Process Assessment, Health Care"/                                                                                                                                                                                                                                                                                                                                                                                                                                                                                                                                                                                                                                                                                                                                                                                                     |
| 22 | Quality Assurance, Health Care/                                                                                                                                                                                                                                                                                                                                                                                                                                                                                                                                                                                                                                                                                                                                                                                                                    |
| 23 | Benchmarking/                                                                                                                                                                                                                                                                                                                                                                                                                                                                                                                                                                                                                                                                                                                                                                                                                                      |
| 24 | Total Quality Management/                                                                                                                                                                                                                                                                                                                                                                                                                                                                                                                                                                                                                                                                                                                                                                                                                          |
| 25 | Quality Improvement/                                                                                                                                                                                                                                                                                                                                                                                                                                                                                                                                                                                                                                                                                                                                                                                                                               |
| 26 | Quality Indicators, Health Care/                                                                                                                                                                                                                                                                                                                                                                                                                                                                                                                                                                                                                                                                                                                                                                                                                   |
| 27 | "Utilization Review"/                                                                                                                                                                                                                                                                                                                                                                                                                                                                                                                                                                                                                                                                                                                                                                                                                              |
| 28 | Patient Outcome Assessment/                                                                                                                                                                                                                                                                                                                                                                                                                                                                                                                                                                                                                                                                                                                                                                                                                        |

|                                           |                                                                                                                                                                                                                                                                                                                                                                                                                                                                                                                     |
|-------------------------------------------|---------------------------------------------------------------------------------------------------------------------------------------------------------------------------------------------------------------------------------------------------------------------------------------------------------------------------------------------------------------------------------------------------------------------------------------------------------------------------------------------------------------------|
| 29                                        | (quality indicat* or quality metric or quality standard* or quality measure* or quality report* or performance measure* or metric or performance metric or usability or care evaluation or benchmark* or scorecard or balanced scorecard or logic model).tw,kf.                                                                                                                                                                                                                                                     |
| 30                                        | (quality adj3 (indicat* or metric* or standard* or measure*)).tw,kf.                                                                                                                                                                                                                                                                                                                                                                                                                                                |
| 31                                        | 21 or 22 or 23 or 24 or 25 or 26 or 27 or 28 or 29 or 30 or 31                                                                                                                                                                                                                                                                                                                                                                                                                                                      |
| 32                                        | 20 and 32                                                                                                                                                                                                                                                                                                                                                                                                                                                                                                           |
| 33                                        | limit 33 to (english language and yr="2015 -Current")                                                                                                                                                                                                                                                                                                                                                                                                                                                               |
| <b>Embase Classic+Embase 1947 to 2022</b> |                                                                                                                                                                                                                                                                                                                                                                                                                                                                                                                     |
| 1                                         | telecommunication/                                                                                                                                                                                                                                                                                                                                                                                                                                                                                                  |
| 2                                         | (remot* adj2 (consult* or interact* or diagnos* or monitor* or treat* or therap* or care)).tw,kw.                                                                                                                                                                                                                                                                                                                                                                                                                   |
| 3                                         | (telemonitor* or telemedicine* or telecommunication* or telehealth*).tw,kw.                                                                                                                                                                                                                                                                                                                                                                                                                                         |
| 4                                         | ((remote or online or video* or text message* or telephone* or phone or phones or email* or virtual* or technolog* or iphone* or smartphone* or mobile application* or mobile app* or teleconferenc* or messenger or whatsapp or skype or zoom or instant messag* or tablet* or e-mail* or asynchronous messag* or synchronous messag* or Videoconferenc* or hotline* or helpline* or call center*) adj3 (communicat* or engag* or discuss* or care or interact* or clinical guidance)).tw,kw. and patient*.tw, kw. |
| 5                                         | ((remote or online or electronic* or video* or text message* or telephone* or phone* or email* or technolog* or virtual* or iphone* or smartphone* or mobile application* or mobile app* or teleconferenc* or messenger or whatsapp or skype or zoom or instant messag* or tablet* or e-mail* or asynchronous messag* or synchronous messag* or Videoconferenc* or hotline* or helpline* or call center*) adj3 (consult* or appointment* or meet or meeting* or visit*)) or virtual tool*).tw,kw.                   |
| 6                                         | ((virtual* or digital*) adj3 (healthcare or health care or health strategy)) or (virtual care or virtual health) or (rapid* adj3 virtual*).tw,kw.                                                                                                                                                                                                                                                                                                                                                                   |
| 7                                         | ((online or digital* or virtual*) adj3 (doctor* or physician* or clinic or clinics or nurse or nurses or nursing or medicine or medical)).tw,kw.                                                                                                                                                                                                                                                                                                                                                                    |
| 8                                         | (digital health or digital first).tw,kw.                                                                                                                                                                                                                                                                                                                                                                                                                                                                            |
| 9                                         | ("e health*" or ehealth* or evisit* or "e-visit").tw,kw.                                                                                                                                                                                                                                                                                                                                                                                                                                                            |
| 10                                        | (online adj3 (healthcare or health care)).tw,kw.                                                                                                                                                                                                                                                                                                                                                                                                                                                                    |
| 11                                        | ((virtual* or digital*) adj3 (healthcare or health care or health strategy)).tw,kw.                                                                                                                                                                                                                                                                                                                                                                                                                                 |

|    |                                                                                                                                                                                                                                                                                                                                                                                                                                                                                                                                                                                                                                                                                                                                                                                                                                                                                                                                                                                                                                                                                                                                                                                                                                                                                                                                                           |
|----|-----------------------------------------------------------------------------------------------------------------------------------------------------------------------------------------------------------------------------------------------------------------------------------------------------------------------------------------------------------------------------------------------------------------------------------------------------------------------------------------------------------------------------------------------------------------------------------------------------------------------------------------------------------------------------------------------------------------------------------------------------------------------------------------------------------------------------------------------------------------------------------------------------------------------------------------------------------------------------------------------------------------------------------------------------------------------------------------------------------------------------------------------------------------------------------------------------------------------------------------------------------------------------------------------------------------------------------------------------------|
| 12 | (teleassist* or "tele-assist*" or teleaudiolog* or "tele-audiolog*" or telebased or "tele-based" or telecancer or "tele-cancer" or "tele-cardiolo*" or telecardiolog* or teleconsult* or "tele-consult*" or telecounselling or "tele-counselling" or telecounseling or "tele-counseling" or teledental or "tele-dental" or telederm* or "tele-derm*" or telediagnos* or "tele-diagnos*" or teledialysis or "tele-dialysis" or teleecho* or "tele-echo*" or teleemerg* or "tele-emerg*" or teleepileps* or "tele-epileps*" or telefollow* or "tele-follow*" or teleguidance or "tele-guidance" or "tele-health*" or telehome* or "tele-home*" or tel ICU or "tele-ICU" or teleintervention* or "tele-intervention*" or telemanag* or "tele-manag*" or telemedicine or "tele-medicine" or telemental* or "tele-mental*" or telemonitor* or "tele-monitor*" or telenurs* or "tele-nurs*" or teleoncolo* or "tele-oncolo*" or teleophthalm* or "tele-ophthalm*" or telepalliat* or "tele-palliat*" or telepatholog* or teleprocedu* or "tele-procedu*" or telepsych* or "tele-psych*" or teleradiol* or "tele-radiol*" or telerefer* or "tele-refer*" or telerehab* or "tele-rehab*" or telesurger* or "tele-surger*" or telesurgic* or "tele-surgic*" or teletherap* or "tele-therap*" or teletreat* or "tele-treat*" or teletriage or "tele-triage").tw,kw. |
| 13 | (tele adj (care or counselling or counseling or diagnos* or health* or intervention* or manag* or therap* or treat* or medicine or medical or nursing)).tw,kw.                                                                                                                                                                                                                                                                                                                                                                                                                                                                                                                                                                                                                                                                                                                                                                                                                                                                                                                                                                                                                                                                                                                                                                                            |
| 14 | ("e-care" or ecare or "e-consult*" or econsult* or "e-diagnos*" or ediagnosis* or "e-medicine" or emedicine or "e-nurse*" or enurse* or "e-nursing" or enursing or "e-physician*" or ephysician* or "e-psych*" or epsych* or "e-therapy" or etherapy or mhEALTH or "M-HEALTH").tw,kw.                                                                                                                                                                                                                                                                                                                                                                                                                                                                                                                                                                                                                                                                                                                                                                                                                                                                                                                                                                                                                                                                     |
| 15 | ((online or video* or text message* or telephone* or phon* or email* or virtual* or technolog* or iphone* or smartphone* or mobile application* or mobile app* or teleconferenc* or messenger or instant messag* or whatsapp or skype or zoom or tablet* or e-mail* or asynchronous messag* or synchronous messag* or Videoconferenc* or hotline* or helpline* or call center*) adj2 (care or counselling or Counseling or diagnos* or health* or intervention* or manag* or therap* or treat* or medicine or medical or nursing)).tw,kw.                                                                                                                                                                                                                                                                                                                                                                                                                                                                                                                                                                                                                                                                                                                                                                                                                 |
| 16 | (virtual* adj3 monitor*).tw,kw.                                                                                                                                                                                                                                                                                                                                                                                                                                                                                                                                                                                                                                                                                                                                                                                                                                                                                                                                                                                                                                                                                                                                                                                                                                                                                                                           |
| 17 | ((implant* sensor* or body sensor*) adj4 (diagnost* or monitor* or report*)).tw,kw.                                                                                                                                                                                                                                                                                                                                                                                                                                                                                                                                                                                                                                                                                                                                                                                                                                                                                                                                                                                                                                                                                                                                                                                                                                                                       |
| 18 | mobile health monitor*.tw,kw.                                                                                                                                                                                                                                                                                                                                                                                                                                                                                                                                                                                                                                                                                                                                                                                                                                                                                                                                                                                                                                                                                                                                                                                                                                                                                                                             |
| 19 | wearable computer/                                                                                                                                                                                                                                                                                                                                                                                                                                                                                                                                                                                                                                                                                                                                                                                                                                                                                                                                                                                                                                                                                                                                                                                                                                                                                                                                        |
| 20 | or/1-19                                                                                                                                                                                                                                                                                                                                                                                                                                                                                                                                                                                                                                                                                                                                                                                                                                                                                                                                                                                                                                                                                                                                                                                                                                                                                                                                                   |
| 21 | Health care quality/                                                                                                                                                                                                                                                                                                                                                                                                                                                                                                                                                                                                                                                                                                                                                                                                                                                                                                                                                                                                                                                                                                                                                                                                                                                                                                                                      |
| 22 | Benchmarking/                                                                                                                                                                                                                                                                                                                                                                                                                                                                                                                                                                                                                                                                                                                                                                                                                                                                                                                                                                                                                                                                                                                                                                                                                                                                                                                                             |
| 23 | Total quality management/                                                                                                                                                                                                                                                                                                                                                                                                                                                                                                                                                                                                                                                                                                                                                                                                                                                                                                                                                                                                                                                                                                                                                                                                                                                                                                                                 |
| 24 | "utilization review" /                                                                                                                                                                                                                                                                                                                                                                                                                                                                                                                                                                                                                                                                                                                                                                                                                                                                                                                                                                                                                                                                                                                                                                                                                                                                                                                                    |

|                 |                                                                                                                                                                                                                                                                                                                                                                                                                                                                                                                |
|-----------------|----------------------------------------------------------------------------------------------------------------------------------------------------------------------------------------------------------------------------------------------------------------------------------------------------------------------------------------------------------------------------------------------------------------------------------------------------------------------------------------------------------------|
| 25              | (quality indicat* or quality metric or quality standard* or quality measure* or quality report* or performance measure* or metric or performance metric or usability or care evaluation or benchmark* or scorecard or balanced scorecard or logic model).tw,kw                                                                                                                                                                                                                                                 |
| 26              | (quality adj2 (indicat* or metric* or standard* or measure*)).tw,kw.                                                                                                                                                                                                                                                                                                                                                                                                                                           |
| 27              | Or/21-26                                                                                                                                                                                                                                                                                                                                                                                                                                                                                                       |
| 28              | 20 and 27                                                                                                                                                                                                                                                                                                                                                                                                                                                                                                      |
| 29              | limit 28 to (english language and yr="2015 - 2021")                                                                                                                                                                                                                                                                                                                                                                                                                                                            |
| <b>PsycInfo</b> |                                                                                                                                                                                                                                                                                                                                                                                                                                                                                                                |
| 1               | exp telemedicine/                                                                                                                                                                                                                                                                                                                                                                                                                                                                                              |
| 2               | (remot* adj2 (consult* or interact* or diagnos* or monitor* or treat* or therap* or care)).tw,sh.                                                                                                                                                                                                                                                                                                                                                                                                              |
| 3               | (telemonitor* or telemedicine* or telecommunication* or telehealth*).tw,sh.                                                                                                                                                                                                                                                                                                                                                                                                                                    |
| 4               | ((((remote or online or video* or text message* or telephone* or phone or phones or email* or virtual* or technolog* or iphone* or smartphone* or mobile application* or mobile app* or teleconferenc* or messenger or whatsapp or skype or zoom or instant messag* or tablet* or e-mail* or asynchronous messag* or synchronous messag* or Videoconferenc* or hotline* or helpline* or call center*) adj3 (communicat* or engag* or discuss* or care or interact* or clinical guidance)) and patient*).tw,sh. |
| 5               | ((((remote or online or electronic* or video* or text message* or telephone* or phone* or email* or technolog* or virtual* or iphone* or smartphone* or mobile application* or mobile app* or teleconferenc* or messenger or whatsapp or skype or zoom or instant messag* or tablet* or e-mail* or asynchronous messag* or synchronous messag* or Videoconferenc* or hotline* or helpline* or call center*) adj3 (consult* or appointment* or meet or meeting* or visit*)) or virtual tool*).tw,sh.            |
| 6               | ((((virtual* or digital*) adj3 (healthcare or health care or health strategy)) or (virtual care or virtual health) or (rapid* adj3 virtual*)).tw,sh.                                                                                                                                                                                                                                                                                                                                                           |
| 7               | ((online or digital* or virtual*) adj3 (doctor* or physician* or clinic or clinics or nurse or nurses or nursing or medicine or medical)).tw,sh.                                                                                                                                                                                                                                                                                                                                                               |
| 8               | (digital health or digital first).tw,sh.                                                                                                                                                                                                                                                                                                                                                                                                                                                                       |
| 9               | ("e health*" or ehealth* or evisit* or "e-visit*").tw,sh.                                                                                                                                                                                                                                                                                                                                                                                                                                                      |
| 10              | ((virtual* or digital*) adj3 (healthcare or health care or health strategy)).tw,sh.                                                                                                                                                                                                                                                                                                                                                                                                                            |
| 11              | (teleassist* or "tele-assist*" or teleaudiolog* or "tele-audiolog*" or telebased or "tele-based" or telecancer or "tele-cancer" or "tele-cardiolo*" or telecardiolog* or teleconsult* or "tele-consult*" or telecounselling or "tele-counselling" or telecounseling or "tele-counseling" or teledental or                                                                                                                                                                                                      |

|    |                                                                                                                                                                                                                                                                                                                                                                                                                                                                                                                                                                                                                                                                                                                                                                                                                                                                                                                                                                                                                                                    |
|----|----------------------------------------------------------------------------------------------------------------------------------------------------------------------------------------------------------------------------------------------------------------------------------------------------------------------------------------------------------------------------------------------------------------------------------------------------------------------------------------------------------------------------------------------------------------------------------------------------------------------------------------------------------------------------------------------------------------------------------------------------------------------------------------------------------------------------------------------------------------------------------------------------------------------------------------------------------------------------------------------------------------------------------------------------|
|    | "tele-dental" or telederm* or "tele-derm*" or telediagnos* or "tele-diagnos*" or teledialysis or "tele-dialysis" or teleecho* or "tele-echo*" or teleemerg* or "tele-emerg*" or teleepileps* or "tele-epileps*" or telefollow* or "tele-follow*" or teleguidance or "tele-guidance" or "tele-health*" or telehome* or "tele-home*" or teleICU or "tele-ICU" or teleintervention* or "tele-intervention*" or telemanag* or "tele-manag*" or telemedicine or "tele-medicine" or telemental* or "tele-mental*" or telemonitor* or "tele-monitor*" or telenurs* or "tele-nurs*" or teleoncolo* or "tele-oncolo*" or teleophthalm* or "tele-ophthalm*" or telepalliat* or "tele-palliat*" or "tele-patholog*" or teleprocedu* or "tele-procedu*" or telepsych* or "tele-psych*" or teleradiol* or "tele-radiol*" or telerefer* or "tele-refer*" or telerehab* or "tele-rehab*" or telesurger* or "tele-surger*" or telesurgic* or "tele-surgic*" or teletherap* or "tele-therap*" or teletreat* or "tele-treat*" or teletriage or "tele-triage").tw,sh. |
| 12 | (tele adj (care or counselling or counseling or diagnos* or health* or intervention* or manag* or therap* or treat* or medicine or medical or nursing)).tw,sh.                                                                                                                                                                                                                                                                                                                                                                                                                                                                                                                                                                                                                                                                                                                                                                                                                                                                                     |
| 13 | ("e-care" or ecare or "e-consult*" or econsult* or "e-diagnos*" or edagnosis* or "e-medicine" or emedicine or "e-nurse*" or enurse* or "e-nursing" or enursing or "e-physician*" or ephysician* or "e-psych*" or epsych* or "e-therapy" or etherapy or mhEALTH or "M-HEALTH").tw,sh.                                                                                                                                                                                                                                                                                                                                                                                                                                                                                                                                                                                                                                                                                                                                                               |
| 14 | ((online or video* or text message* or telephone* or phon* or email* or virtual* or technolog* or iphone* or smartphone* or mobile application* or mobile app* or teleconferenc* or messenger or instant messag* or whatsapp or skype or zoom or tablet* or e-mail* or asynchronous messag* or synchronous messag* or Videoconferenc* or hotline* or helpline* or call center*) adj2 (care or counselling or Counseling or diagnos* or health* or intervention* or manag* or therap* or treat* or medicine or medical or nursing)).tw,sh.                                                                                                                                                                                                                                                                                                                                                                                                                                                                                                          |
| 15 | (virtual* adj3 monitor*).tw,sh.                                                                                                                                                                                                                                                                                                                                                                                                                                                                                                                                                                                                                                                                                                                                                                                                                                                                                                                                                                                                                    |
| 16 | ((implant* sensor* or body sensor*) adj4 (diagnost* or monitor* or report*)).tw,sh.                                                                                                                                                                                                                                                                                                                                                                                                                                                                                                                                                                                                                                                                                                                                                                                                                                                                                                                                                                |
| 17 | mobile health monitor*.tw,sh.                                                                                                                                                                                                                                                                                                                                                                                                                                                                                                                                                                                                                                                                                                                                                                                                                                                                                                                                                                                                                      |
| 18 | (online adj3 (healthcare or health care)).tw,sh.                                                                                                                                                                                                                                                                                                                                                                                                                                                                                                                                                                                                                                                                                                                                                                                                                                                                                                                                                                                                   |
| 19 | 1 or 2 or 3 or 4 or 5 or 6 or 7 or 8 or 9 or 10 or 11 or 12 or 13 or 14 or 15 or 16 or 17 or 18 (quality                                                                                                                                                                                                                                                                                                                                                                                                                                                                                                                                                                                                                                                                                                                                                                                                                                                                                                                                           |
| 20 | indicat* or quality metric or quality standard* or quality measure* or quality report* or performance measure* or metric or performance metric or usability or care evaluation or benchmark* or scorecard or balanced scorecard or logic model).tw,sh.                                                                                                                                                                                                                                                                                                                                                                                                                                                                                                                                                                                                                                                                                                                                                                                             |
| 21 | (quality adj3 (indicat* or metric* or standard* or measure*)).tw,sh.                                                                                                                                                                                                                                                                                                                                                                                                                                                                                                                                                                                                                                                                                                                                                                                                                                                                                                                                                                               |
| 22 | exp "quality of services"/                                                                                                                                                                                                                                                                                                                                                                                                                                                                                                                                                                                                                                                                                                                                                                                                                                                                                                                                                                                                                         |
| 23 | exp "Quality of Care"/                                                                                                                                                                                                                                                                                                                                                                                                                                                                                                                                                                                                                                                                                                                                                                                                                                                                                                                                                                                                                             |
| 24 | exp Program Evaluation/                                                                                                                                                                                                                                                                                                                                                                                                                                                                                                                                                                                                                                                                                                                                                                                                                                                                                                                                                                                                                            |

|     |                                                                                                                                                                                                                                                                   |
|-----|-------------------------------------------------------------------------------------------------------------------------------------------------------------------------------------------------------------------------------------------------------------------|
| 25  | 20 or 21 or 22 or 23 or 24                                                                                                                                                                                                                                        |
| 26  | 19 and 25                                                                                                                                                                                                                                                         |
| 27  | limit 26 to (english language and yr="2015 - 2021")                                                                                                                                                                                                               |
|     | Cochrane Library                                                                                                                                                                                                                                                  |
| #1  | MeSH descriptor: [Telemedicine] explode all trees                                                                                                                                                                                                                 |
| #2  | MeSH descriptor: [Internet-Based Intervention] explode all trees                                                                                                                                                                                                  |
| #3  | (remote consult*) or (remote interact*) pr (remote diagnos*) or (remote monitor*) or (remote treat*) or (remote therap*) or (remote care):ti,ab,kw                                                                                                                |
| #4  | (virtual health*) or (digital health*) or (online health*) or (ehealth*) or (mobile health*):ti,ab, kw                                                                                                                                                            |
| #5  | #1 or #2 or #3 or #4                                                                                                                                                                                                                                              |
| #6  | MeSH descriptor: [Quality of Health Care] this term only                                                                                                                                                                                                          |
| #7  | MeSH descriptor: [Outcome and Process Assessment, Health Care] this term only                                                                                                                                                                                     |
| #8  | MeSH descriptor: [Quality Assurance, Health Care] this term only                                                                                                                                                                                                  |
| #9  | MeSH descriptor: [Benchmarking] this term only                                                                                                                                                                                                                    |
| #10 | MeSH descriptor: [Total Quality Management] this term only                                                                                                                                                                                                        |
| #11 | MeSH descriptor: [Quality Improvement] this term only                                                                                                                                                                                                             |
| #12 | MeSH descriptor: [Quality Indicators, Health Care] this term only                                                                                                                                                                                                 |
| #13 | MeSH descriptor: [Utilization Review] this term only                                                                                                                                                                                                              |
| #14 | MeSH descriptor: [Patient Outcome Assessment] this term only                                                                                                                                                                                                      |
| #15 | (quality indicat*) or (quailty metric*) or (quality standard*) or (quality measure*) or (quality report*) or (performance measure*) or (performance metric*) or (usability) or (care evaluation) or (scorecard) or (balanced scorecard) or (logic model):ti,ab,kw |
| #16 | #6 or #7 or #8 or #9 or #10 or #11 or #12 or #13 or #14 or #15                                                                                                                                                                                                    |
| #17 | #5 and #16 with Cochrane Library publication date Between Jan 2015 and Present                                                                                                                                                                                    |

**Table 2 - Grey Literature Search**

|                           |
|---------------------------|
| Targeted Website Searches |
|---------------------------|

| <i>Organization name &amp; website URL</i>                                                                                                                                                                                                                         | <i>Search strategy(s)/ terms searched</i>                                                                                                         |
|--------------------------------------------------------------------------------------------------------------------------------------------------------------------------------------------------------------------------------------------------------------------|---------------------------------------------------------------------------------------------------------------------------------------------------|
| McMaster Health Forum<br><a href="http://www.healthsystemevidence.org">www.healthsystemevidence.org</a>                                                                                                                                                            | 1. (virtual care OR digital health) AND quality<br>2. Telemedicine AND quality indicators                                                         |
| Publications Canada<br><a href="https://publications.gc.ca">https://publications.gc.ca</a>                                                                                                                                                                         | 1. Virtual care<br>2. Telemedicine<br>3. eHealth                                                                                                  |
| Health Quality Ontario<br><a href="http://www.hqontario.ca/Evidence-to-Improve-Care/Health-Technology-Assessment">http://www.hqontario.ca/Evidence-to-Improve-Care/Health-Technology-Assessment</a>                                                                | 1. Virtual care<br>2. Telemedicine<br>3. Telehealth                                                                                               |
| NICE<br><a href="http://www.nice.org.uk">www.nice.org.uk</a>                                                                                                                                                                                                       | 1. Virtual care<br>2. Telemedicine<br>3. Telehealth<br>4. Digital care                                                                            |
| AHRQ - EPC<br><a href="http://www.ahrq.gov/research/findings/evidence-based-reports/search.html">http://www.ahrq.gov/research/findings/evidence-based-reports/search.html</a>                                                                                      | 1. Virtual care<br>2. Telemedicine<br>3. Telehealth                                                                                               |
| AHRQ – EHC<br><a href="https://effectivehealthcare.ahrq.gov/products-tools/">https://effectivehealthcare.ahrq.gov/products-tools/</a>                                                                                                                              | 1. Virtual care<br>2. Telemedicine<br>3. Telehealth                                                                                               |
| Canadian Medical Association<br><a href="http://www.cma.ca">www.cma.ca</a>                                                                                                                                                                                         | 1. Virtual care<br>2. Telemedicine<br>3. Telehealth                                                                                               |
| Institute for Healthcare Improvement – White Papers<br><a href="http://www.ihl.org">www.ihl.org</a>                                                                                                                                                                | N/A – no search function, reviewed ‘Publications’ and ‘White Papers’ section of site                                                              |
| Health Quality Council of Alberta<br><a href="http://hqca.ca/studies-and-reviews/completed-reviews/">http://hqca.ca/studies-and-reviews/completed-reviews/</a>                                                                                                     | 1. Virtual care<br>2. Telemedicine<br>3. Telehealth                                                                                               |
| INATHA Secretariat<br><a href="http://www.inahta.org/publications">http://www.inahta.org/publications</a>                                                                                                                                                          | 1. Virtual care<br>2. Telemedicine<br>3. Telehealth                                                                                               |
| WHO Health Evidence Network<br><a href="http://www.euro.who.int/en/what-we-do/data-and-evidence/health-evidence-network/en/publications/by-keyword">http://www.euro.who.int/en/what-we-do/data-and-evidence/health-evidence-network/en/publications/by-keyword</a> | 1. Virtual care<br>2. Telemedicine<br>3. Telehealth                                                                                               |
| <b>Targeted Database Searches</b>                                                                                                                                                                                                                                  |                                                                                                                                                   |
| <i>Database name &amp; URL</i>                                                                                                                                                                                                                                     | <i>Search strategy(s)/ terms searched</i>                                                                                                         |
| Google Scholar<br><a href="http://scholar.google.com">scholar.google.com</a>                                                                                                                                                                                       | 1. “virtual care” AND quality indicators<br>2. Telemedicine AND quality indicators<br>3. eHealth AND quality indicators                           |
| MedRxiv<br><a href="http://www.medrxiv.org">www.medrxiv.org</a>                                                                                                                                                                                                    | 1. Virtual care quality indicator<br>2. Telemedicine quality indicator<br>Results screened by 1 reviewer, 23 items selected for further screening |



|                                                                           |                                                                                |
|---------------------------------------------------------------------------|--------------------------------------------------------------------------------|
| OpenGrey<br><a href="http://www.opengrey.eu/">http://www.opengrey.eu/</a> | 1. Virtual care<br>Telemedicine                                                |
| <b>Targeted Journal Search</b>                                            |                                                                                |
| <i>Journal Name</i>                                                       | <i>Search strategy(s)/ terms searched</i>                                      |
| Journal of Medical Internet Research                                      | Hand-searched (reviewed table of contents) of all editions in previous 2 years |
| Lancet Digital Health                                                     | Hand-searched (reviewed table of contents) of all editions in previous 2 years |
| Nature Digital Medicine                                                   | Hand-searched (reviewed table of contents) of all editions in previous 2 years |
