# Supplementary material for: Quality measures of virtual care in ambulatory healthcare environments: a scoping review
Source: PubMed Central journal article supplement — BMJ Open. 2024 Apr 2;14(4):e078214. doi: 10.1136/bmjopen-2023-078214 (PMC10989112; doi:10.1136/bmjopen-2023-078214), 2024-04-02
Supplement: bmjopen-2023-078214supp004.pdf [file bmjopen-2023-078214supp004.pdf]

**Table: Frequency of NAM quality domain sub-codes.**

| <i>NAM Quality Domain</i>                                         | <b>Patient Experience<br/>(n=200)</b> | <b>Provider Experience<br/>(n=52)</b> |
|-------------------------------------------------------------------|---------------------------------------|---------------------------------------|
| <i>Effective (n=64)<br/>[n (%)]</i>                               | 52 (81)                               | 12 (19)                               |
| <i>Equitable (n=25)<br/>[n (%)]</i>                               | 24 (96)                               | 1 (4)                                 |
| <i>Efficient (n=36)<br/>[n (%)]</i>                               | 30 (83)                               | 6 (17)                                |
| <i>Patient-centered (n=66)<br/>[n (%)]</i>                        | 60 (91)                               | 6 (9)                                 |
| <i>Safe (n=10)<br/>[n (%)]</i>                                    | 8 (80)                                | 2 (20)                                |
| <i>Timely (n=9)<br/>[n (%)]</i>                                   | 7 (78)                                | 2 (22)                                |
| <i>Sustainable (n=36)<br/>[n (%)]</i>                             | 16 (44)                               | 20 (56)                               |
| <i>Composite (n=6)<br/>[n (%)]</i>                                | 3 (50)                                | 3 (50)                                |
| *Indicators that address more than one of the NAM quality domains |                                       |                                       |
