# Supplementary figures and images for: Quality measures of virtual care in ambulatory healthcare environments: a scoping review
Source: PubMed Central journal article supplement — BMJ Open. 2024 Apr 2;14(4):e078214. doi: 10.1136/bmjopen-2023-078214 (PMC10989112; doi:10.1136/bmjopen-2023-078214), 2024-04-02

## Screening Criteria

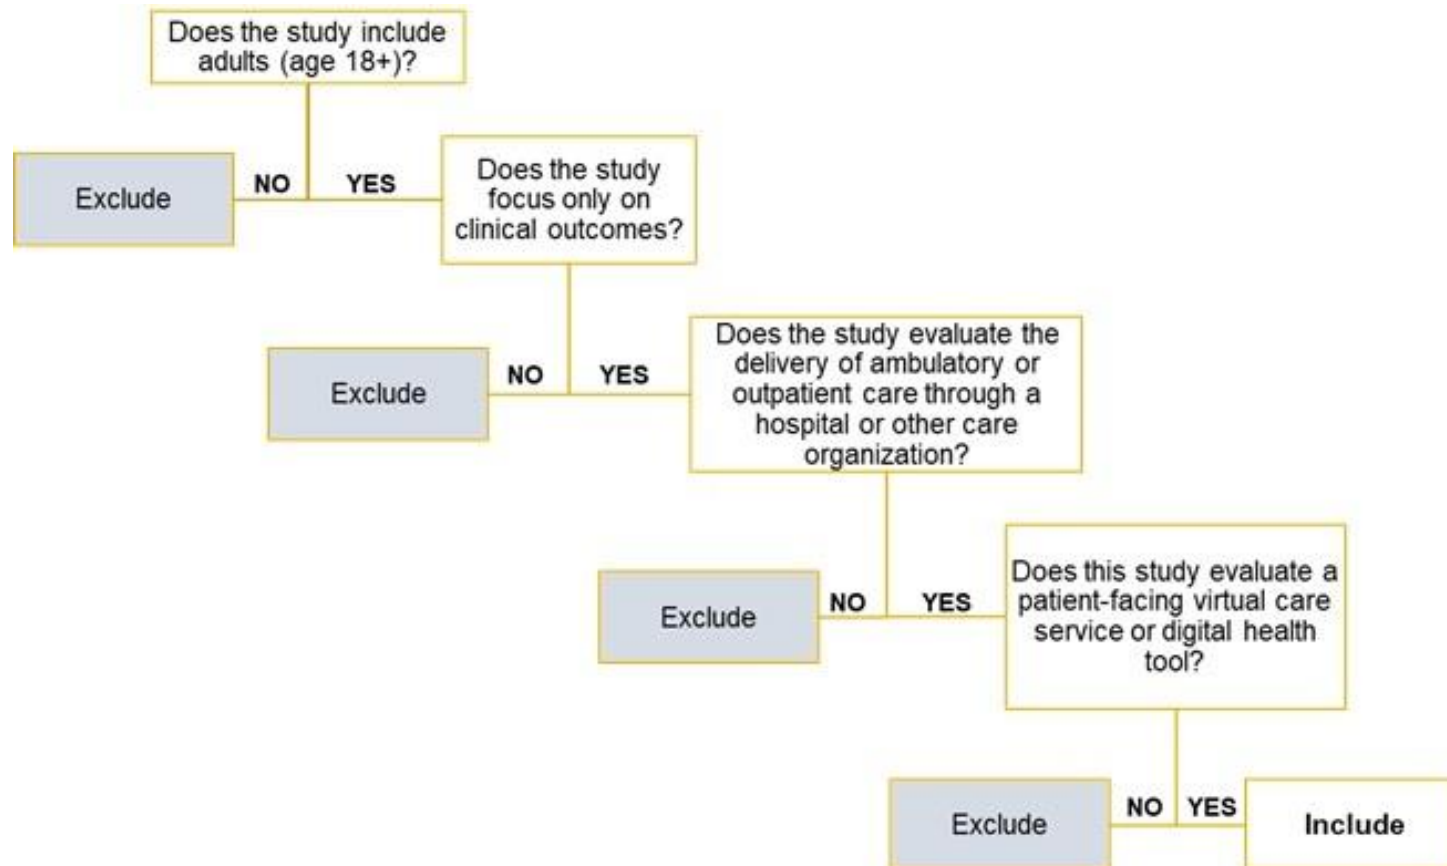

Supplement: bmjopen-2023-078214supp002.pdf [file bmjopen-2023-078214supp002.pdf]
